# Supplementary material for: To which extent are socio-hydrology studies truly integrative? The case of natural hazards and disaster research
Source: Copernicus journal article supplement (doi:10.5194/hess-26-2301-2022), 2022-05-02
Supplement: Supplementary file 1 [file hess-26-2301-2022-supplement.zip]

Archive with 3 entries (3 files):
- hess-26-2301-2022-supplement-title-page.pdf
- Supplementary material-Systematic_Review.xlsx
- Supplementary material-Table S1 S2 and FigS1.pdf
