# Supplementary material for: To which extent are socio-hydrology studies truly integrative? The case of natural hazards and disaster research
Source: Copernicus journal article supplement (doi:10.5194/hess-26-2301-2022), 2022-05-02
Supplement: Supplementary file 1 [file hess-26-2301-2022-supplement.zip › hess-26-2301-2022-supplement-title-page.pdf]

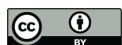

## *Supplement of*

# **To which extent are socio-hydrology studies truly integrative? The case of natural hazards and disaster research**

**Franciele Maria Vanelli et al.**

*Correspondence to:* Franciele Maria Vanelli ([franciele.vanelli@ufrgs.br](mailto:franciele.vanelli@ufrgs.br)) and Mariana Madruga de Brito ([mariana.brito@ufz.de](mailto:mariana.brito@ufz.de))

- [hess-26-2301-2022-supplement-title-page.pdf](#)
- [Supplementary material-Systematic\\_Review.xlsx](#)
- [Supplementary material-Table S1 S2 and FigS1.pdf](#)

The copyright of individual parts of the supplement might differ from the article licence.
