# Supplementary material for: To which extent are socio-hydrology studies truly integrative? The case of natural hazards and disaster research
Source: Copernicus journal article supplement (doi:10.5194/hess-26-2301-2022), 2022-05-02
Supplement: Supplementary file 1 [file hess-26-2301-2022-supplement.zip › Supplementary material-Systematic_Review.xlsx]

## Sheet: Systematic Review Procedures
	Results of each step of review systematic (Figure 1) are described in this file.
	1-Searching: Total records identified through Web of Science and Scopus.
	2-Screening:
	Column Duplicate: Total records after duplicates removed. Codes: [0 =no duplicate; 1 =WoS; 2 =Scopus; 3= Duplicate in Scopus]
	Column Title+Abstract Screening: Total records after screened title and abstract considering inclusion and exclusion criteria. Codes: [1=include; 0=exclude]
	Column Articles retrieved: Total records of full-text articles retrieved. Codes: [1=available; 0= no available]
	Column Full text screening: Total records after screened full-text articles considering inclusion and exclusion criteria. Codes: [1=include; 0=exclude] and in the classification codes: [1=yes; 0=no]

## Sheet: 1-Searching
1-Searching: Total records identified through Web of Science and Scopus.
Authors	Article Title	Source Title	Author Keywords	Abstract	Email Addresses	Publication Year	Volume	Issue	Start Page	End Page	Article Number	DOI	WoS Categories	Research Areas	Fonte
Mohorjy A.M.	MULTIDISCIPLINARY PLANNING AND MANAGING OF WATER REUSE	JAWRA Journal of the American Water Resources Association		ABSTRACT: This paper examines a rapidly expanding area of water supplies, specifically water reclamation and reuse, and provides a comprehensive planning methodology for developing and evaluating water reuse alternatives. The methodology uses five phases: goal setting, identification of reuse opportunities, development and evaluation of planning alternatives, assessment of water reuse linkages, a…	Mohorjy, A.M.; Civil Engineering Department, P.O. Box 9027, Jeddah, 21413, Saudi Arabia	1989	25	2	433	442		10.1111/j.1752-1688.1989.tb03080.x			Scopus
Lele, S	Watershed services of tropical forests: from hydrology to economic valuation to integrated analysis	CURRENT OPINION IN ENVIRONMENTAL SUSTAINABILITY		Watershed services' provided by forest ecosystems are receiving increasing attention in the research and policy arena. Changes in forest cover in tropical regions take many different forms and result in multi-dimensional changes in watershed processes: soil erosion rates, peak and low-flow levels, groundwater recharge rates, and water quality. These changes are in turn mediated by the socio-techn…	slele@atree.org	2009	1	2	148	155		10.1016/j.cosust.2009.10.007	Green & Sustainable Science & Technology; Environmental Sciences	Science & Technology - Other Topics; Environmental Sciences & Ecology	WoS
Sivakumar, B	Socio-hydrology: not a new science, but a recycled and re-worded hydrosociology	HYDROLOGICAL PROCESSES			s.bellie@unsw.edu.au	2012	26	24	3788	3790		10.1002/hyp.9511	Water Resources	Water Resources	WoS
Sivapalan, M; Savenije, HHG; Bloschl, G	Socio-hydrology: A new science of people and water	HYDROLOGICAL PROCESSES	humans; global change; predictions; social sciences; co-evolution; emergent patterns		sivapala@illinois.edu	2012	26	8	1270	1276		10.1002/hyp.8426	Water Resources	Water Resources	WoS
Nusser, M; Schmidt, S; Dame, J	Irrigation and Development in the Upper Indus Basin Characteristics and Recent Changes of a Socio-hydrological System in Central Ladakh, India	MOUNTAIN RESEARCH AND DEVELOPMENT	Irrigation systems; land use change; socio-hydrology; high mountains; Ladakh; Trans-Himalaya; India	This article deals with the development of irrigated agriculture in the Upper Indus Basin of Central Ladakh in Northern India. Artificial irrigation, fed by meltwater from glaciers and snow cover, forms the backbone of regional food production in this semiarid Trans-Himalayan environment. Following an integrated socio-hydrological approach, we present 2 local case studies on the village level and…	marcus.nuesser@uni-heidelberg.de	2012	32	1	51	61		10.1659/MRD-JOURNAL-D-11-00091.1	Environmental Sciences; Geography, Physical	Environmental Sciences & Ecology; Physical Geography	WoS
Montanari, A; Young, G; Savenije, HHG; Hughes, D; Wagener, T; Ren, LL; Koutsoyiannis, D; Cudennec, C; Toth, E; Grimaldi, S; Bloschl, G; Sivapalan, M; Beven, K; Gupta, H; Hipsey, M; Schaefli, B; Arheimer, B; Boegh, E; Schymanski, S; Di Baldassarre, G; Yu, B; Hubert, P; Huang, Y; Schumann, A; Post, DA; Srinivasan, V; Harman, C; Thompson, S; Rogger, M; Viglione, A; McMillan, H; Characklis, G; Pang, …	Panta Rhei-Everything Flows: Change in hydrology and society-The IAHS Scientific Decade 2013-2022	HYDROLOGICAL SCIENCES JOURNAL-JOURNAL DES SCIENCES HYDROLOGIQUES	hydrology; environment; socio-hydrology; change; IAHS decade	The new Scientific Decade 2013-2022 of IAHS, entitled Panta RheiEverything Flows, is dedicated to research activities on change in hydrology and society. The purpose of Panta Rhei is to reach an improved interpretation of the processes governing the water cycle by focusing on their changing dynamics in connection with rapidly changing human systems. The practical aim is to improve our capability …	alberto.montanari@unibo.it	2013	58	6	1256	1275		10.1080/02626667.2013.809088	Water Resources	Water Resources	WoS
Wescoat, JL	Reconstructing the duty of water: a study of emergent norms in socio-hydrology	HYDROLOGY AND EARTH SYSTEM SCIENCES		This paper assesses the changing norms of water use known as the duty of water. It is a case study in historical socio-hydrology, or more precisely the history of socio-hydrologic ideas, a line of research that is useful for interpreting and anticipating changing social values with respect to water. The duty of water is currently defined as the amount of water reasonably required to irrigate a su…	wescoat@mit.edu	2013	17	12	4759	4768		10.5194/hess-17-4759-2013	Geosciences, Multidisciplinary; Water Resources	Geology; Water Resources	WoS
Zlinszky, A; Timar, G	Historic maps as a data source for socio-hydrology: a case study of the Lake Balaton wetland system, Hungary	HYDROLOGY AND EARTH SYSTEM SCIENCES		Socio-hydrology is the science of human influence on hydrology and the influence of the water cycle on human social systems. This newly emerging discipline inherently involves a historic perspective, often focusing on timescales of several centuries. While data on human history is typically available for this time frame, gathering information on the hydrological situation during such a period can…	andras.zlinszky@okologia.mta.hu	2013	17	11	4589	4606		10.5194/hess-17-4589-2013	Geosciences, Multidisciplinary; Water Resources	Geology; Water Resources	WoS
Di Baldassarre, G; Viglione, A; Carr, G; Kuil, L; Salinas, JL; Bloschl, G	Socio-hydrology: conceptualising human-flood interactions	HYDROLOGY AND EARTH SYSTEM SCIENCES		Over history, humankind has tended to settle near streams because of the role of rivers as transportation corridors and the fertility of riparian areas. However, human settlements in floodplains have been threatened by the risk of flooding. Possible responses have been to resettle away and/or modify the river system by building flood control structures. This has led to a complex web of interactio…	g.dibaldassarre@unesco-ihe.org; viglione@hydro.tuwien.ac.at	2013	17	8	3295	3303		10.5194/hess-17-3295-2013	Geosciences, Multidisciplinary; Water Resources	Geology; Water Resources	WoS
Thompson, SE; Sivapalan, M; Harman, CJ; Srinivasan, V; Hipsey, MR; Reed, P; Montanari, A; Bloschl, G	Developing predictive insight into changing water systems: use-inspired hydrologic science for the Anthropocene	HYDROLOGY AND EARTH SYSTEM SCIENCES		Globally, many different kinds of water resources management issues call for policy-and infrastructure-based responses. Yet responsible decision-making about water resources management raises a fundamental challenge for hydrologists: making predictions about water resources on decadal- to century-long timescales. Obtaining insight into hydrologic futures over 100 yr timescales forces researchers …	sally.thompson@berkeley.edu	2013	17	12	5013	5039		10.5194/hess-17-5013-2013	Geosciences, Multidisciplinary; Water Resources	Geology; Water Resources	WoS
Thompson S.E., Sivapalan M., Harman C.J., Srinivasan V., Hipsey M.R., Reed P., Montanari A., Blöschl G.	Developing predictive insight into changing water systems: Use-inspired hydrologic science for the anthropocene	Hydrology and Earth System Sciences		Globally, many different kinds of water resources management issues call for policy- and infrastructure-based responses. Yet responsible decision-making about water resources management raises a fundamental challenge for hydrologists: making predictions about water resources on decadal- to century-long timescales. Obtaining insight into hydrologic futures over 100 yr timescales forces researchers…	Thompson, S.E.; Department of Civil and Environmental Engineering, , Berkeley, CA, 94720, United States; email: sally.thompson@berkeley.edu	2013	17	12	5013	5039		10.5194/hess-17-5013-2013			Scopus
Wescoat J.L.	Reconstructing the duty of water: A study of emergent norms in socio-hydrology	Hydrology and Earth System Sciences		This paper assesses the changing norms of water use known as the duty of water. It is a case study in historical socio-hydrology, or more precisely the history of socio-hydrologic ideas, a line of research that is useful for interpreting and anticipating changing social values with respect to water. The duty of water is currently defined as the amount of water reasonably required to irrigate a su…	Wescoat, J.L.; Massachusetts Institute of Technology, Cambridge, MA, United States; email: wescoat@mit.edu	2013	17	12	4759	4768		10.5194/hess-17-4759-2013			Scopus
Zlinszky A., Timár G.	Historic maps as a data source for socio-hydrology: A case study of the Lake Balaton wetland system, Hungary	Hydrology and Earth System Sciences		Socio-hydrology is the science of human influence on hydrology and the influence of the water cycle on human social systems. This newly emerging discipline inherently involves a historic perspective, often focusing on timescales of several centuries. While data on human history is typically available for this time frame, gathering information on the hydrological situation during such a period can…	Zlinszky, A.; Balaton Limnological Institute, Klebelsberg Kuno út 3, 8237 Tihany, Hungary; email: andras.zlinszky@okologia.mta.hu	2013	17	11	4589	4606		10.5194/hess-17-4589-2013			Scopus
Di Baldassarre G., Viglione A., Carr G., Kuil L., Salinas J.L., Blöschl G.	Socio-hydrology: Conceptualising human-flood interactions	Hydrology and Earth System Sciences		Over history, humankind has tended to settle near streams because of the role of rivers as transportation corridors and the fertility of riparian areas. However, human settlements in floodplains have been threatened by the risk of flooding. Possible responses have been to resettle away and/or modify the river system by building flood control structures. This has led to a complex web of interactio…	Di Baldassarre, G.; Department of Integrated Water Systems and Governance, , Delft, Netherlands; email: g.dibaldassarre@unesco-ihe.org	2013	17	8	3295	3303		10.5194/hess-17-3295-2013			Scopus
Montanari A., Young G., Savenije H.H.G., Hughes D., Wagener T., Ren L.L., Koutsoyiannis D., Cudennec C., Toth E., Grimaldi S., Blöschl G., Sivapalan M., Beven K., Gupta H., Hipsey M., Schaefli B., Arheimer B., Boegh E., Schymanski S.J., Di Baldassarre G., Yu B., Hubert P., Huang Y., Schumann A., Post D.A., Srinivasan V., Harman C., Thompson S., Rogger M., Viglione A., McMillan H., Characklis G., …	"Panta Rhei-Everything Flows": Change in hydrology and society-The IAHS Scientific Decade 2013-2022	Hydrological Sciences Journal	change; environment; hydrology; IAHS decade; socio-hydrology	The new Scientific Decade 2013-2022 of IAHS, entitled "Panta Rhei-Everything Flows", is dedicated to research activities on change in hydrology and society. The purpose of Panta Rhei is to reach an improved interpretation of the processes governing the water cycle by focusing on their changing dynamics in connection with rapidly changing human systems. The practical aim is to improve our capabili…	Montanari, A.; Department DICAM, , Bologna, Italy; email: alberto.montanari@unibo.it	2013	58	6	1256	1275		10.1080/02626667.2013.809088			Scopus
Fernandez, S; Bouleau, G; Treyer, S	Bringing politics back into water planning scenarios in Europe	JOURNAL OF HYDROLOGY	Scenarios; DPSIR; Biopolitics; Indicators; Political geography; Water management planning	The shift from government to governance in European water policies conveys a pluralist conception of stakeholder participation in planning. This article argues that the current Driving forces-Pressures-State-Impact-Response (DPSIR) approach to the planning of natural resource use, developed by the Organisation for Economic Cooperation and Development (OECD) and the European Environmental Agency (…	sara.fernandez@engees.unistra.fr; gabrielle.bouleau@irstea.fr; sebastien.treyer@iddri.org	2014	518		17	27		10.1016/j.jhydrol.2014.01.010	Engineering, Civil; Geosciences, Multidisciplinary; Water Resources	Engineering; Geology; Water Resources	WoS
Naughton, O; Hynds, PD	Public awareness, behaviours and attitudes towards domestic wastewater treatment systems in the Republic of Ireland	JOURNAL OF HYDROLOGY	Socio-hydrology; Domestic wastewater treatment; Water management; Public health	Numerous studies have highlighted and quantified the role of domestic wastewater treatment systems (DWWTSs) as significant sources of human-specific aquatic contaminants in both developed and developing regions, particularly with respect to private and municipal groundwater supplies. However, from a socio-hydrological perspective, little work has focused on these systems and the potential environ…	naughto@tcd.ie	2014	518		108	119		10.1016/j.jhydrol.2013.08.049	Engineering, Civil; Geosciences, Multidisciplinary; Water Resources	Engineering; Geology; Water Resources	WoS
Viglione, A; Di Baldassarre, G; Brandimarte, L; Kuil, L; Carr, G; Salinas, JL; Scolobig, A; Bloschl, G	Insights from socio-hydrology modelling on dealing with flood risk - Roles of collective memory, risk-taking attitude and trust	JOURNAL OF HYDROLOGY	Floodplain; Feedback; Human-flood interaction; Risk coping culture; Dynamic modelling	The risk coping culture of a community plays a major role in the development of urban floodplains. In this paper we analyse, in a conceptual way, the interplay of community risk coping culture, flooding damage and economic growth. We particularly focus on three aspects: (i) collective memory, i.e., the capacity of the community to keep risk awareness high; (ii) risk-taking attitude, i.e., the amo…	viglione@hydro.tuwien.ac.at	2014	518		71	82		10.1016/j.jhydrol.2014.01.018	Engineering, Civil; Geosciences, Multidisciplinary; Water Resources	Engineering; Geology; Water Resources	WoS
Sivapalan, M; Konar, M; Srinivasan, V; Chhatre, A; Wutich, A; Scott, CA; Wescoat, JL; Rodriguez-Iturbe, I	Socio-hydrology: Use-inspired water sustainability science for the Anthropocene	EARTHS FUTURE	Sociohydrology; Use-inspired; Water systems; Human systems; Sustainability; Anthropocene	Water is at the core of the most difficult sustainability challenges facing humans in the modern era, involving feedbacks across multiple scales, sectors, and agents. We suggest that a transformative new discipline is necessary to address many and varied water-related challenges in the Anthropocene. Specifically, we propose socio-hydrology as a use-inspired scientific discipline to focus on under…	mkonar@illinois.edu	2014	2	4	225	230		10.1002/2013EF000164	Environmental Sciences; Geosciences, Multidisciplinary; Meteorology & Atmospheric Sciences	Environmental Sciences & Ecology; Geology; Meteorology & Atmospheric Sciences	WoS
van Emmerik, THM; Li, Z; Sivapalan, M; Pande, S; Kandasamy, J; Savenije, HHG; Chanan, A; Vigneswaran, S	Socio-hydrologic modeling to understand and mediate the competition for water between agriculture development and environmental health: Murrumbidgee River basin, Australia	HYDROLOGY AND EARTH SYSTEM SCIENCES		Competition for water between humans and ecosystems is set to become a flash point in the coming decades in many parts of the world. An entirely new and comprehensive quantitative framework is needed to establish a holistic understanding of that competition, thereby enabling the development of effective mediation strategies. This paper presents a modeling study centered on the Murrumbidgee River …	t.h.m.vanemmerik@tudelft.nl	2014	18	10	4239	4259		10.5194/hess-18-4239-2014	Geosciences, Multidisciplinary; Water Resources	Geology; Water Resources	WoS
Neto, AR; Scott, CA; Lima, EA; Montenegro, SMGL; Cirilo, JA	Infrastructure sufficiency in meeting water demand under climate-induced socio-hydrological transition in the urbanizing Capibaribe River basin - Brazil	HYDROLOGY AND EARTH SYSTEM SCIENCES		Water availability for a range of human uses will increasingly be affected by climate change, especially in the arid and semiarid tropics. The main objective of this study is to evaluate the infrastructure sufficiency in meeting water demand under climate-induced socio-hydrological transition in the Capibaribe River basin (CRB). The basin has experienced spatial and sectoral (agriculture-to-urban…	alfredoribeiro@ufpe.br	2014	18	9	3449	3459		10.5194/hess-18-3449-2014	Geosciences, Multidisciplinary; Water Resources	Geology; Water Resources	WoS
Pande, S; Ertsen, M; Sivapalan, M	Endogenous technological and population change under increasing water scarcity	HYDROLOGY AND EARTH SYSTEM SCIENCES		Ancient civilizations may have dispersed or collapsed under extreme dry conditions. There are indications that the same may hold for modern societies. However, hydroclimatic change cannot be the sole predictor of the fate of contemporary societies in water-scarce regions. This paper focuses on technological change as a factor that may ameliorate the effects of increasing water scarcity and as suc…	s.pande@tudelft.nl	2014	18	8	3239	3258		10.5194/hess-18-3239-2014	Geosciences, Multidisciplinary; Water Resources	Geology; Water Resources	WoS
Elshafei, Y; Sivapalan, M; Tonts, M; Hipsey, MR	A prototype framework for models of socio-hydrology: identification of key feedback loops and parameterisation approach	HYDROLOGY AND EARTH SYSTEM SCIENCES		It is increasingly acknowledged that, in order to sustainably manage global freshwater resources, it is critical that we better understand the nature of human-hydrology interactions at the broader catchment system scale. Yet to date, a generic conceptual framework for building models of catchment systems that include adequate representation of socioeconomic systems - and the dynamic feedbacks bet…	yasmina.elshafei@research.uwa.edu.au	2014	18	6	2141	2166		10.5194/hess-18-2141-2014	Geosciences, Multidisciplinary; Water Resources	Geology; Water Resources	WoS
Ertsen, MW; Murphy, JT; Purdue, LE; Zhu, T	A journey of a thousand miles begins with one small step - human agency, hydrological processes and time in socio-hydrology	HYDROLOGY AND EARTH SYSTEM SCIENCES		When simulating social action in modeling efforts, as in socio-hydrology, an issue of obvious importance is how to ensure that social action by human agents is well-represented in the analysis and the model. Generally, human decision-making is either modeled on a yearly basis or lumped together as collective social structures. Both responses are problematic, as human decision-making is more compl…	m.w.ertsen@tudelft.nl	2014	18	4	1369	1382		10.5194/hess-18-1369-2014	Geosciences, Multidisciplinary; Water Resources	Geology; Water Resources	WoS
Gober, P; Wheater, HS	Socio-hydrology and the science-policy interface: a case study of the Saskatchewan River basin	HYDROLOGY AND EARTH SYSTEM SCIENCES		While there is a popular perception that Canada is a water-rich country, the Saskatchewan River basin (SRB) in Western Canada exemplifies the multiple threats to water security seen worldwide. It is Canada's major food-producing region and home to globally significant natural resource development. The SRB faces current water challenges stemming from (1) a series of extreme events, including major…	patricia.gober@usask.ca; howard.wheater@usask.ca	2014	18	4	1413	1422		10.5194/hess-18-1413-2014	Geosciences, Multidisciplinary; Water Resources	Geology; Water Resources	WoS
Lane, SN	Acting, predicting and intervening in a socio-hydrological world	HYDROLOGY AND EARTH SYSTEM SCIENCES		This paper asks a simple question: if humans and their actions co-evolve with hydrological systems (Sivapalan et al., 2012), what is the role of hydrological scientists, who are also humans, within this system? To put it more directly, as traditionally there is a supposed separation of scientists and society, can we maintain this separation as socio-hydrologists studying a socio-hydrological worl…	stuart.lane@unil.ch	2014	18	3	927	952		10.5194/hess-18-927-2014	Geosciences, Multidisciplinary; Water Resources	Geology; Water Resources	WoS
Kandasamy, J; Sounthararajah, D; Sivabalan, P; Chanan, A; Vigneswaran, S; Sivapalan, M	Socio-hydrologic drivers of the pendulum swing between agricultural development and environmental health: a case study from Murrumbidgee River basin, Australia	HYDROLOGY AND EARTH SYSTEM SCIENCES		This paper presents a case study centred on the Murrumbidgee River basin in eastern Australia. It illustrates the dynamics of the balance between water extraction and use for food production, and efforts to mitigate and reverse consequent degradation of the riparian environment. In particular, the paper traces the history of a pendulum swing between an exclusive focus on agricultural development …	jaya.kandasamy@uts.edu.au	2014	18	3	1027	1041		10.5194/hess-18-1027-2014	Geosciences, Multidisciplinary; Water Resources	Geology; Water Resources	WoS
Savenije, HHG; Hoekstra, AY; van der Zaag, P	Evolving water science in the Anthropocene	HYDROLOGY AND EARTH SYSTEM SCIENCES		This paper reviews the changing relation between human beings and water since the Industrial Revolution, a period that has been called the Anthropocene because of the unprecedented scale at which humans have altered the planet during this time. We show how the rapidly changing world urges us to continuously improve our understanding of the complex interactions between humans and the water system.…	h.h.g.savenije@tudelft.nl	2014	18	1	319	332		10.5194/hess-18-319-2014	Geosciences, Multidisciplinary; Water Resources	Geology; Water Resources	WoS
Liu, Y; Tian, F; Hu, H; Sivapalan, M	Socio-hydrologic perspectives of the co-evolution of humans and water in the Tarim River basin, Western China: the Taiji-Tire model	HYDROLOGY AND EARTH SYSTEM SCIENCES		This paper presents a historical socio-hydrological analysis of the Tarim River basin (TRB), Xinjiang Uyghur Autonomous Region, in Western China, from the time of the opening of the Silk Road to the present. The analysis is aimed at exploring the historical co-evolution of coupled human-water systems and at identifying common patterns or organizing principles underpinning socio-hydrological syste…	tianfq@tsinghua.edu.cn	2014	18	4	1289	1303		10.5194/hess-18-1289-2014	Geosciences, Multidisciplinary; Water Resources	Geology; Water Resources	WoS
Van Emmerik T.H.M., Li Z., Sivapalan M., Pande S., Kandasamy J., Savenije H.H.G., Chanan A., Vigneswaran S.	Socio-hydrologic modeling to understand and mediate the competition for water between agriculture development and environmental health: Murrumbidgee River basin, Australia	Hydrology and Earth System Sciences		Competition for water between humans and ecosystems is set to become a flash point in the coming decades in many parts of the world. An entirely new and comprehensive quantitative framework is needed to establish a holistic understanding of that competition, thereby enabling the development of effective mediation strategies. This paper presents a modeling study centered on the Mur-rumbidgee River…	Van Emmerik, T.H.M.; Department of Water Management, Netherlands	2014	18	10	4239	4259		10.5194/hess-18-4239-2014			Scopus
Ribeiro Neto A., Scott C.A., Lima E.A., L. Montenegro S.M.G., Cirilo J.A.	Infrastructure sufficiency in meeting water demand under climate-induced socio-hydrological transition in the urbanizing Capibaribe River basin &ndash; Brazil	Hydrology and Earth System Sciences		Water availability for a range of human uses will increasingly be affected by climate change, especially in the arid and semiarid tropics. The main objective of this study is to evaluate the infrastructure sufficiency in meeting water demand under climate-induced socio-hydrological transition in the Capibaribe River basin (CRB). The basin has experienced spatial and sectoral (agriculture-to-urban…		2014	18	9	3449	3459		10.5194/hess-18-3449-2014			Scopus
Pande S., Ertsen M., Sivapalan M.	Endogenous technological and population change under increasing water scarcity	Hydrology and Earth System Sciences		Ancient civilizations may have dispersed or collapsed under extreme dry conditions. There are indications that the same may hold for modern societies. However, hydroclimatic change cannot be the sole predictor of the fate of contemporary societies in water-scarce regions. This paper focuses on technological change as a factor that may ameliorate the effects of increasing water scarcity and as suc…	Pande, S.; Department of Water Management, Delft University of Technology, Delft, Netherlands; email: s.pande@tudelft.nl	2014	18	8	3239	3258		10.5194/hess-18-3239-2014			Scopus
Naughton O., Hynds P.D.	Public awareness, behaviours and attitudes towards domestic wastewater treatment systems in the Republic of Ireland	Journal of Hydrology	Domestic wastewater treatment; Public health; Socio-hydrology; Water management	Numerous studies have highlighted and quantified the role of domestic wastewater treatment systems (DWWTSs) as significant sources of human-specific aquatic contaminants in both developed and developing regions, particularly with respect to private and municipal groundwater supplies. However, from a socio-hydrological perspective, little work has focused on these systems and the potential environ…	Naughton, O.; Department of Civil, Structural and Environmental Engineering, Trinity College DublinIreland	2014	518	PA	108	119		10.1016/j.jhydrol.2013.08.049			Scopus
Elshafei Y., Sivapalan M., Tonts M., Hipsey M.R.	A prototype framework for models of socio-hydrology: Identification of key feedback loops and parameterisation approach	Hydrology and Earth System Sciences		It is increasingly acknowledged that, in order to sustainably manage global freshwater resources, it is critical that we better understand the nature of human-hydrology interactions at the broader catchment system scale. Yet to date, a generic conceptual framework for building models of catchment systems that include adequate representation of socioeconomic systems - and the dynamic feedbacks bet…	Elshafei, Y.; School of Earth and Environment, University of Western Australia, Crawley WA 6009, Australia; email: yasmina.elshafei@research.uwa.edu.au	2014	18	6	2141	2166		10.5194/hess-18-2141-2014			Scopus
Gober P., Wheater H.S.	Socio-hydrology and the science&ndash;policy interface: A case study of the Saskatchewan River basin	Hydrology and Earth System Sciences		While there is a popular perception that Canada is a water-rich country, the Saskatchewan River basin (SRB) in Western Canada exemplifies the multiple threats to water security seen worldwide. It is Canada's major food-producing region and home to globally significant natural resource development. The SRB faces current water challenges stemming from (1) a series of extreme events, including major…	Gober, P.; Johnson-Shoyama Graduate School of Public Policy, University of Saskatchewan, 101 Diefenbaker Place, Canada	2014	18	4	1413	1422		10.5194/hess-18-1413-2014			Scopus
Ertsen M.W., Murphy J.T., Purdue L.E., Zhu T.	A journey of a thousand miles begins with one small step-human agency, hydrological processes and time in socio-hydrology	Hydrology and Earth System Sciences		When simulating social action in modeling efforts, as in socio-hydrology, an issue of obvious importance is how to ensure that social action by human agents is well-represented in the analysis and the model. Generally, human decision-making is either modeled on a yearly basis or lumped together as collective social structures. Both responses are problematic, as human decision-making is more compl…	Ertsen, M.W.; Delft University of Technology, Water Resources Department, Delft, Netherlands; email: m.w.ertsen@tudelft.nl	2014	18	4	1369	1382		10.5194/hess-18-1369-2014			Scopus
Liu Y., Tian F., Hu H., Sivapalan M.	Socio-hydrologic perspectives of the co-evolution of humans and water in the Tarim River basin, Western China: The Taiji-Tire model	Hydrology and Earth System Sciences		This paper presents a historical socio-hydrological analysis of the Tarim River basin (TRB), Xinjiang Uyghur Autonomous Region, in Western China, from the time of the opening of the Silk Road to the present. The analysis is aimed at exploring the historical co-evolution of coupled human-water systems and at identifying common patterns or organizing principles underpinning socio-hydrological syste…	Tian, F.; State Key Laboratory of Hydroscience and Engineering, Department of Hydraulic Engineering, Tsinghua University, Beijing 100084, China; email: tianfq@tsinghua.edu.cn	2014	18	4	1289	1303		10.5194/hess-18-1289-2014			Scopus
Kandasamy J., Sounthararajah D., Sivabalan P., Chanan A., Vigneswaran S., Sivapalan M.	Socio-hydrologic drivers of the pendulum swing between agricultural development and environmental health: A case study from Murrumbidgee River basin, Australia	Hydrology and Earth System Sciences		This paper presents a case study centred on the Murrumbidgee River basin in eastern Australia. It illustrates the dynamics of the balance between water extraction and use for food production, and efforts to mitigate and reverse consequent degradation of the riparian environment. In particular, the paper traces the history of a pendulum swing between an exclusive focus on agricultural development …	Kandasamy, J.; University of Technology Sydney, Sydney, Australia; email: jaya.kandasamy@uts.edu.au	2014	18	3	1027	1041		10.5194/hess-18-1027-2014			Scopus
Lane S.N.	Acting, predicting and intervening in a socio-hydrological world	Hydrology and Earth System Sciences		This paper asks a simple question: if humans and their actions co-evolve with hydrological systems (Sivapalan et al., 2012), what is the role of hydrological scientists, who are also humans, within this system? To put it more directly, as traditionally there is a supposed separation of scientists and society, can we maintain this separation as socio-hydrologists studying a socio-hydrological worl…	Lane, S.N.; Institute of Earth Surface Dynamics, , Lausanne, Switzerland; email: stuart.lane@unil.ch	2014	18	3	927	952		10.5194/hess-18-927-2014			Scopus
Savenije H.H.G., Hoekstra A.Y., Van Der Zaag P.	Evolving water science in the Anthropocene	Hydrology and Earth System Sciences		This paper reviews the changing relation between human beings and water since the Industrial Revolution, a period that has been called the Anthropocene because of the unprecedented scale at which humans have altered the planet during this time. We show how the rapidly changing world urges us to continuously improve our understanding of the complex interactions between humans and the water system.…	Savenije, H.H.G.; Water Resources Section, , Delft, Netherlands; email: h.h.g.savenije@tudelft.nl	2014	18	1	319	332		10.5194/hess-18-319-2014			Scopus
Viglione A., Di Baldassarre G., Brandimarte L., Kuil L., Carr G., Salinas J.L., Scolobig A., Blöschl G.	Insights from socio-hydrology modelling on dealing with flood risk - Roles of collective memory, risk-taking attitude and trust	Journal of Hydrology	Dynamic modelling; Feedback; Floodplain; Human-flood interaction; Risk coping culture	The risk coping culture of a community plays a major role in the development of urban floodplains. In this paper we analyse, in a conceptual way, the interplay of community risk coping culture, flooding damage and economic growth. We particularly focus on three aspects: (i) collective memory, i.e., the capacity of the community to keep risk awareness high; (ii) risk-taking attitude, i.e., the amo…	Viglione, A.; Institute of Hydraulic Engineering and Water Resources Management, Austria	2014	518	PA	71	82		10.1016/j.jhydrol.2014.01.018			Scopus
Fernandez S., Bouleau G., Treyer S.	Bringing politics back into water planning scenarios in Europe	Journal of Hydrology	Biopolitics; DPSIR; Indicators; Political geography; Scenarios; Water management planning	The shift from government to governance in European water policies conveys a pluralist conception of stakeholder participation in planning. This article argues that the current Driving forces-Pressures-State-Impact-Response (DPSIR) approach to the planning of natural resource use, developed by the Organisation for Economic Cooperation and Development (OECD) and the European Environmental Agency (…	Fernandez, S.; Institut national de recherche en sciences et tech. pour l'environnement et l'agriculture (Irstea), 1 quai Koch, BP 61039, France	2014	518	PA	17	27		10.1016/j.jhydrol.2014.01.010			Scopus
Boelens R., Hoogesteger J., Rodriguez De Francisco J.C.	Commoditizing water territories: The clash between Andean water rights cultures and payment for environmental services policies	Capitalism, Nature, Socialism		The article examines the clash between and Andean water rights cultures and payment for environmental services policies. Positivist science disciplines tend to conflate the concept with the units comprised by watershed or catchment boundaries. Others would emphasize the fact that a geopolitical space constitutes a socio-cultural construction, based on a group's historical, context-based appropria…		2014	25	3	84	102		10.1080/10455752.2013.876867			Scopus
Ashmore, P	Towards a sociogeomorphology of rivers	GEOMORPHOLOGY	Rivers; Socio-nature; Sociogeomorphology; Anthropo-geomorphology; Urban; River restoration	While human impacts on rivers and other landforms have long been a component of geomorphic research, little of this work explicitly includes insights into human agency from social science or recognises that in many cases rivers can be considered to be hybrid co-productions or 'socio-natures'. A socio-geomorphic approach proposed here has parallels with some aspects of sociohydrology and can exten…	pashmore@uwo.ca	2015	251		149	156		10.1016/j.geomorph.2015.02.020	Geography, Physical; Geosciences, Multidisciplinary	Physical Geography; Geology	WoS
Allaire, MC; Vogel, RM; Kroll, CN	The hydromorphology of an urbanizing watershed using multivariate elasticity	ADVANCES IN WATER RESOURCES	Urbanization; Streamflow; Socio-hydrology; Land use; Baseflow; Sensitivity	A wide range of environmental damages have been linked to the urbanization of watersheds. While much is known about the impacts of urbanization on floods, there remains considerable uncertainty regarding the impact on average and low flows. We introduce a generalized multivariate approach for exploring hydro-morphological problems that involves estimation of the multivariate sensitivity (or elast…	ma3536@columbia.edu; Richard.vogel@tufts.edu; cnkroll@esf.edu	2015	86		147	154		10.1016/j.advwatres.2015.09.022	Water Resources	Water Resources	WoS
Hunter, C; Gironas, J; Bolster, D; Karavitis, CA	A Dynamic, Multivariate Sustainability Measure for Robust Analysis of Water Management under Climate and Demand Uncertainty in an Arid Environment	WATER	sustainability assessment; arid zone hydrology; watershed modeling; groundwater; water supply; system analysis; predicative modeling; climate change; sociohydrology; vulnerability	Considering water resource scarcity and uncertainty in climate and demand futures, decision-makers require techniques for sustainability analysis in resource management. Through unclear definitions of sustainability, however, traditional indices for resource evaluation propose options of limited flexibility by adopting static climate and demand scenarios, limiting analysis variables to a particul…	ckhunter@uc.cl; jgironas@ing.puc.cl; dbolster@nd.edu; ckaravitis@aua.gr	2015	7	11	5928	5958		10.3390/w7115928	Environmental Sciences; Water Resources	Environmental Sciences & Ecology; Water Resources	WoS
Hu, Y; Garcia-Cabrejo, O; Cai, XM; Valocchi, AJ; DuPont, B	Global sensitivity analysis for large-scale socio-hydrological models using Hadoop	ENVIRONMENTAL MODELLING & SOFTWARE	Multi-agent system; Socio-hydrological model; Global Sensitivity Analysis; Hadoop; Polynomial Chaos Expansion	A multi-agent system (MAS) model is coupled with a physically-based groundwater model to understand the declining water table in the heavily irrigated Republican River basin. Each agent in the MAS model is associated with five behavioral parameters, and we estimate their influences on the coupled models using Global Sensitivity Analysis (GSA). This paper utilizes Hadoop-based Cloud Computing tech…	yaohu2@illinois.edu	2015	73		231	243		10.1016/j.envsoft.2015.08.015	Computer Science, Interdisciplinary Applications; Engineering, Environmental; Environmental Sciences; Water Resources	Computer Science; Engineering; Environmental Sciences & Ecology; Water Resources	WoS
Elshafei, Y; Coletti, JZ; Sivapalan, M; Hipsey, MR	A model of the socio-hydrologic dynamics in a semiarid catchment: Isolating feedbacks in the coupled human-hydrology system	WATER RESOURCES RESEARCH		The challenge of sustainable freshwater management requires identification and characterization of the underlying components and dynamic interactions within the coupled human-hydrology system. This paper builds a model that captures the dynamic water balance evolution and coupled human response within the Lake Toolibin catchment in West Australia's wheatbelt region. Two subcatchments in different…	yasmina.elshafei@research.uwa.edu.au	2015	51	8	6442	6471		10.1002/2015WR017048	Environmental Sciences; Limnology; Water Resources	Environmental Sciences & Ecology; Marine & Freshwater Biology; Water Resources	WoS
Baker, TJ; Cullen, B; Debevec, L; Abebe, Y	A socio-hydrological approach for incorporating gender into biophysical models and implications for water resources research	APPLIED GEOGRAPHY	Participatory mapping; Ethiopia; Women; SWAT; Ecosystem services	Men and women interact with water resources and landscapes in different ways, and there are frequent criticisms that little research is undertaken across disciplines to address this issue. Biophysical scientists in particular struggle with how to integrate gendered water uses into models that are necessarily based on prevailing laws and equations that describe the movement of water through the hy…	T.Baker@cgiar.org	2015	62		325	338		10.1016/j.apgeog.2015.05.008	Geography	Geography	WoS
Rushforth, RR; Ruddell, BL	The Hydro-Economic Interdependency of Cities: Virtual Water Connections of the Phoenix, Arizona Metropolitan Area	SUSTAINABILITY	urban water footprint; virtual water; water infrastructure; commodity flows; metropolitan area; cooperative water resources management; science of cities; economic networks; urban metabolism; socio-hydrology; hydro-economics; coupled natural-human systems	Water footprinting has revealed hydro-economic interdependencies between distant global geographies via trade, especially of agricultural and manufactured goods. However, for metropolitan areas, trade not only entails commodity flows at many scales from intra-municipal to global, but also substantial intra-metropolitan flows of the skilled labor that is essential to a city's high-value economy. V…	Richard.Rushforth@asu.edu; bruddell@asu.edu	2015	7	7	8522	8547		10.3390/su7078522	Green & Sustainable Science & Technology; Environmental Sciences; Environmental Studies	Science & Technology - Other Topics; Environmental Sciences & Ecology	WoS
Klassert, C; Sigel, K; Gawel, E; Klauer, B	Modeling Residential Water Consumption in Amman: The Role of Intermittency, Storage, and Pricing for Piped and Tanker Water	WATER	household water consumption; intermittent supply; water tankers; socio-hydrology; hydro-economics; agent-based model; water scarcity; demand-side policies; consumer surplus; long-term sustainability; Jordan	Jordan faces an archetypal combination of high water scarcity, with a per capita water availability of around 150 m(3) per year significantly below the absolute scarcity threshold of 500 m(3), and strong population growth, especially due to the Syrian refugee crisis. A transition to more sustainable water consumption patterns will likely require Jordan's water authorities to rely more strongly on…	christian.klassert@ufz.de; katja.sigel@ufz.de; erik.gawel@ufz.de; bernd.klauer@ufz.de	2015	7	7	3643	3670		10.3390/w7073643	Environmental Sciences; Water Resources	Environmental Sciences & Ecology; Water Resources	WoS
Wheater, HS; Gober, P	Water security and the science agenda	WATER RESOURCES RESEARCH	water security; trans-disciplinary water science; large-scale observatory; science-policy interface; socio-hydrology; modeling and decision support systems	The freshwater environment is facing unprecedented global pressures. Unsustainable use of surface and groundwater is ubiquitous. Gross pollution is seen in developing economies, nutrient pollution is a global threat to aquatic ecosystems, and flood damage is increasing. Droughts have severe local consequences, but effects on food can be global. These current pressures are set in the context of ra…	howard.wheater@usask.ca	2015	51	7	5406	5424		10.1002/2015WR016892	Environmental Sciences; Limnology; Water Resources	Environmental Sciences & Ecology; Marine & Freshwater Biology; Water Resources	WoS
Doyle, MW; Singh, J; Lave, R; Robertson, MM	The morphology of streams restored for market and nonmarket purposes: Insights from a mixed natural-social science approach	WATER RESOURCES RESEARCH	sociohydrology; geomorphology; restoration	We use geomorphic surveys to quantify the differences between restored and nonrestored streams, and the difference between streams restored for market purposes (compensatory mitigation) from those restored for nonmarket programs. We also analyze the social and political-economic drivers of the stream restoration and mitigation industry using analysis of policy documents and interviews with key pe…	Martin.doyle@duke.edu	2015	51	7	5603	5622		10.1002/2015WR017030	Environmental Sciences; Limnology; Water Resources	Environmental Sciences & Ecology; Marine & Freshwater Biology; Water Resources	WoS
Vogel, RM; Lall, U; Cai, XM; Rajagopalan, B; Weiskel, PK; Hooper, RP; Matalas, NC	Hydrology: The interdisciplinary science of water	WATER RESOURCES RESEARCH		We live in a world where biophysical and social processes are tightly coupled. Hydrologic systems change in response to a variety of natural and human forces such as climate variability and change, water use and water infrastructure, and land cover change. In turn, changes in hydrologic systems impact socioeconomic, ecological, and climate systems at a number of scales, leading to a coevolution o…	richard.vogel@tufts.edu	2015	51	6	4409	4430		10.1002/2015WR017049	Environmental Sciences; Limnology; Water Resources	Environmental Sciences & Ecology; Marine & Freshwater Biology; Water Resources	WoS
Wilson, NJ; Walter, MT; Waterhouse, J	Indigenous Knowledge of Hydrologic Change in the Yukon River Basin: A Case Study of Ruby, Alaska	ARCTIC	climate change; Indigenous knowledge of water; socio-hydrology; river dynamics; water resources	In the Arctic and Subarctic, the contribution of Indigenous knowledge to understanding environmental change has been established over the last several decades. This paper explores the role of Indigenous knowledge of water in understanding hydrologic change within complex social-ecological systems. Observations of hydrology in the Yukon River Basin, contributed by 20 community experts from Ruby Vi…	n.wilson@alumni.ubc.ca	2015	68	1	93	106		10.14430/arctic4459	Environmental Sciences; Geography, Physical	Environmental Sciences & Ecology; Physical Geography	WoS
Hale, RL; Armstrong, A; Baker, MA; Bedingfield, S; Betts, D; Buahin, C; Buchert, M; Crowl, T; Dupont, RR; Ehleringer, JR; Endter-Wada, J; Flint, C; Grant, J; Hinners, S; Horsburgh, JS; Jackson-Smith, D; Jones, AS; Licon, C; Null, SE; Odame, A; Pataki, DE; Rosenberg, D; Runburg, M; Stoker, P; Strong, C	iSAW: Integrating Structure, Actors, and Water to study socio-hydro-ecological systems	EARTHS FUTURE	human-water system; sociohydrology; framework	Urbanization, climate, and ecosystem change represent major challenges for managing water resources. Although water systems are complex, a need exists for a generalized representation of these systems to identify important components and linkages to guide scientific inquiry and aid water management. We developed an integrated Structure-Actor-Water framework (iSAW) to facilitate the understanding …	rebecca.l.hale@utah.edu	2015	3	3	110	132		10.1002/2014EF000295	Environmental Sciences; Geosciences, Multidisciplinary; Meteorology & Atmospheric Sciences	Environmental Sciences & Ecology; Geology; Meteorology & Atmospheric Sciences	WoS
Smidt, E; Assaf, K; Tamimi, A; ter Horst, R; Zayed, O	The Israeli-Palestinian Water Distribution Revisited: Can Hydro-Entropy be a Useful Tool to Understand The Complexity of Hydropolitics?	INTERNATIONAL JOURNAL OF WATER GOVERNANCE	Palestine - Israel water case; chaos and order; hydro-entropy; hydrolectics; hydropolitics; water governance; water management	Against the background of a failed Kerry peace initiative, severe militarization of the Gaza conflict in the summer of 2014 and an overall rise of tensions in the region and between superpowers, the question is posed if and how existing and new tools can help in fostering future water negotiations between Palestine and Israel. We reflect on the narrative using a number of concepts. The Transbound…	e.h.smidt@tudelft.nl; dr.karan.assaf@gmail.com; a.tamimi@phg.org; roosterhorst@gmail.com; zayed2001@yahoo.com	2015	3	2	37	58		10.7564/13-IJWG24	Water Resources	Water Resources	WoS
Bhattacharya, S	Traditional water harvesting structures and sustainable water management in India: A socio-hydrological review	INTERNATIONAL LETTERS OF NATURAL SCIENCES	water management; rainwater harvesting; sustainability; traditional	Water harvesting systems are traditional technologies that have met the needs of local populations for many centuries indicating the systems are clearly sustainable. It is simply defined as a method for inducing, collecting, storing and conserving local surface run-off for future productive use. It is one of the oldest and most commonly used sustainable water management systems in India. There ar…	sayan.evs@gmail.com	2015	37		30	38		10.18052/www.scipress.com/ILNS.37.30	Multidisciplinary Sciences	Science & Technology - Other Topics	WoS
Srinivasan, V	Reimagining the past - use of counterfactual trajectories in socio-hydrological modelling: the case of Chennai, India	HYDROLOGY AND EARTH SYSTEM SCIENCES		The developing world is rapidly urbanizing. One of the challenges associated with this growth will be to supply water to growing cities of the developing world. Traditional planning tools fare poorly over 30-50 year time horizons because these systems are changing so rapidly. Models that hold land use, economic patterns, governance systems or technology static over a long planning horizon could r…	veena.srinivasan@atree.org	2015	19	2	785	801		10.5194/hess-19-785-2015	Geosciences, Multidisciplinary; Water Resources	Geology; Water Resources	WoS
Parveen, S; Winiger, M; Schmidt, S; Nusser, M	IRRIGATION IN UPPER HUNZA: EVOLUTION OF SOCIO-HYDROLOGICAL INTERACTIONS IN THE KARAKORAM, NORTHERN PAKISTAN	ERDKUNDE	Irrigation systems; glacier change; livelihoods; high mountains; Pakistan	Based on three case studies, this paper describes and analyzes the structure and dynamics of irrigation systems in Upper Hunza, located in the western Karakoram, Pakistan. In these deeply incised and arid valleys, glacier and snow melt-water are the primary water sources for agricultural production. The study shows how glacio-fluvial dynamics impact upon irrigation systems and land use practices,…	parveen@uni-bonn.de; winiger@uni-bonn.de; s.schmidt@sai.uni-heidelberg.de; marcus.nuesser@uni-heidelberg.de	2015	69	1	69	85		10.3112/erdkunde.2015.01.05	Geography; Geography, Physical	Geography; Physical Geography	WoS
Liu, D; Tian, F; Lin, M; Sivapalan, M	A conceptual socio-hydrological model of the co-evolution of humans and water: case study of the Tarim River basin, western China	HYDROLOGY AND EARTH SYSTEM SCIENCES		The complex interactions and feedbacks between humans and water are critically important issues but remain poorly understood in the newly proposed discipline of socio-hydrology (Sivapalan et al., 2012). An exploratory model with the appropriate level of simplification can be valuable for improving our understanding of the co-evolution and self-organization of socio-hydrological systems driven by …	tianfq@tsinghua.edu.cn	2015	19	2	1035	1054		10.5194/hess-19-1035-2015	Geosciences, Multidisciplinary; Water Resources	Geology; Water Resources	WoS
Srinivasan, V; Thompson, S; Madhyastha, K; Penny, G; Jeremiah, K; Lele, S	Why is the Arkavathy River drying? A multiple-hypothesis approach in a data-scarce region	HYDROLOGY AND EARTH SYSTEM SCIENCES		Water planning decisions are only as good as our ability to explain historical trends and make reasonable predictions of future water availability. But predicting water availability can be a challenge in rapidly growing regions, where human modifications of land and waterscapes are changing the hydrologic system. Yet, many regions of the world lack the long-term hydrologic monitoring records need…	veena.srinivasan@atree.org	2015	19	4	1905	1917		10.5194/hess-19-1905-2015	Geosciences, Multidisciplinary; Water Resources	Geology; Water Resources	WoS
Troy, TJ; Konar, M; Srinivasan, V; Thompson, S	Moving sociohydrology forward: a synthesis across studies	HYDROLOGY AND EARTH SYSTEM SCIENCES		Sociohydrology is the study of coupled human-water systems, building on the premise that water and human systems co-evolve: the state of the water system feeds back onto the human system, and vice versa, a situation denoted as two-way coupling. A recent special issue in HESS/ESD, Predictions under change: water, earth, and biota in the Anthropocene, includes a number of sociohydrologic publicatio…	tara.troy@lehigh.edu	2015	19	8	3667	3679		10.5194/hess-19-3667-2015	Geosciences, Multidisciplinary; Water Resources	Geology; Water Resources	WoS
Zhou, S; Huang, Y; Wei, Y; Wang, G	Socio-hydrological water balance for water allocation between human and environmental purposes in catchments	HYDROLOGY AND EARTH SYSTEM SCIENCES		Rebalancing water allocation between human consumptive uses and the environment in water catchments is a global challenge. This paper proposes a socio-hydrological water balance framework by partitioning catchment total evapotranspiration (ET) into ET for society and ET for natural ecological systems, and establishing the linkage between the changes of water balance and its social drivers and res…	ywei@unimelb.edu.au	2015	19	8	3715	3726		10.5194/hess-19-3715-2015	Geosciences, Multidisciplinary; Water Resources	Geology; Water Resources	WoS
Ashmore P.	Towards a sociogeomorphology of rivers	Geomorphology	Anthropo-geomorphology; River restoration; Rivers; Socio-nature; Sociogeomorphology; Urban	While human impacts on rivers and other landforms have long been a component of geomorphic research, little of this work explicitly includes insights into human agency from social science or recognises that in many cases rivers can be considered to be hybrid co-productions or 'socio-natures'. A socio-geomorphic approach proposed here has parallels with some aspects of sociohydrology and can exten…	Ashmore, P.; Department of Geography, Canada; email: pashmore@uwo.ca	2015	251		149	156		10.1016/j.geomorph.2015.02.020			Scopus
Allaire M.C., Vogel R.M., Kroll C.N.	The hydromorphology of an urbanizing watershed using multivariate elasticity	Advances in Water Resources	Baseflow; Land use; Sensitivity; Socio-hydrology; Streamflow; Urbanization	A wide range of environmental damages have been linked to the urbanization of watersheds. While much is known about the impacts of urbanization on floods, there remains considerable uncertainty regarding the impact on average and low flows. We introduce a generalized multivariate approach for exploring hydromorphological problems that involves estimation of the multivariate sensitivity (or elasti…	Allaire, M.C.; Columbia Water Center, Columbia UniversityUnited States	2015	86		147	154		10.1016/j.advwatres.2015.09.022			Scopus
Gonzales P., Ajami N.K.	Urban water sustainability: An integrative framework for regional water management	Hydrology and Earth System Sciences Discussions		Traditional urban water supply portfolios have proven to be unsustainable under the uncertainties associated with growth and long-term climate variability. Introducing alternative water supplies such as recycled water, captured runoff, desalination, as well as demand management strategies such as conservation and efficiency measures, has been widely proposed to address the long-term sustainabilit…	Gonzales, P.; Department of Civil and Environmental Engineering, United States	2015	12	11	11291	11329		10.5194/hessd-12-11291-2015			Scopus
Hu Y., Garcia-Cabrejo O., Cai X., Valocchi A.J., DuPont B.	Global sensitivity analysis for large-scale socio-hydrological models using Hadoop	Environmental Modelling and Software	Global Sensitivity Analysis; Hadoop; Multi-agent system; Polynomial Chaos Expansion; Socio-hydrological model	A multi-agent system (MAS) model is coupled with a physically-based groundwater model to understand the declining water table in the heavily irrigated Republican River basin. Each agent in the MAS model is associated with five behavioral parameters, and we estimate their influences on the coupled models using Global Sensitivity Analysis (GSA). This paper utilizes Hadoop-based Cloud Computing tech…	Hu, Y.; Hydrosystems Lab., 205 N. Mathews Ave., 2527D, United States; email: yaohu2@illinois.edu	2015	73		231	243		10.1016/j.envsoft.2015.08.015			Scopus
Zhou S., Huang Y., Wei Y., Wang G.	Socio-hydrological water balance for water allocation between human and environmental purposes in catchments	Hydrology and Earth System Sciences		Rebalancing water allocation between human consumptive uses and the environment in water catchments is a global challenge. This paper proposes a socio-hydrological water balance framework by partitioning catchment total evapotranspiration (ET) into ET for society and ET for natural ecological systems, and establishing the linkage between the changes of water balance and its social drivers and res…	Wei, Y.; Australia-China Joint Research Centre on River Basin Management, Australia; email: ywei@unimelb.edu.au	2015	19	8	3715	3726		10.5194/hess-19-3715-2015			Scopus
Troy T.J., Konar M., Srinivasan V., Thompson S.	Moving sociohydrology forward: A synthesis across studies	Hydrology and Earth System Sciences		Sociohydrology is the study of coupled human-water systems, building on the premise that water and human systems co-evolve: the state of the water system feeds back onto the human system, and vice versa, a situation denoted as "two-way coupling". A recent special issue in HESS/ESD, "Predictions under change: water, earth, and biota in the Anthropocene", includes a number of sociohydrologic public…	Troy, T.J.; Department of Civil and Environmental Engineering, STEPS 9A, 1 W. Packer Ave, United States; email: tara.troy@lehigh.edu	2015	19	8	3667	3679		10.5194/hess-19-3667-2015			Scopus
Garcia M., Portney K., Islam S.	A question driven socio-hydrological modeling process	Hydrology and Earth System Sciences Discussions		Human and hydrological systems are coupled: human activity impacts the hydrological cycle and hydrological conditions can, but do not always, trigger changes in human systems. Traditional modeling approaches with no feedback between hydrological and human systems typically cannot offer insight into how different patterns of natural variability or human induced changes may propagate through this c…	Garcia, M.; Civil and Environmental Engineering Department, 200 College Avenue, United States	2015	12	8	8289	8335		10.5194/hessd-12-8289-2015			Scopus
Elshafei Y., Coletti J.Z., Sivapalan M., Hipsey M.R.	A model of the socio-hydrologic dynamics in a semiarid catchment: Isolating feedbacks in the coupled human-hydrology system	Water Resources Research	catchment systems model; coupled system feedbacks; land use change; socio-hydrology; water resources management	The challenge of sustainable freshwater management requires identification and characterization of the underlying components and dynamic interactions within the coupled human-hydrology system. This paper builds a model that captures the dynamic water balance evolution and coupled human response within the Lake Toolibin catchment in West Australia's wheatbelt region. Two subcatchments in different…	Elshafei, Y.; School of Earth and Environment, University of Western AustraliaAustralia	2015	51	8	6442	6471		10.1002/2015WR017048			Scopus
Vogel R.M., Lall U., Cai X., Rajagopalan B., Weiskel P.K., Hooper R.P., Matalas N.C.	Hydrology: The interdisciplinary science of water	Water Resources Research	coupled human and natural systems; integrated water resources management; sociohydrology; transdisciplinary; water resource systems	We live in a world where biophysical and social processes are tightly coupled. Hydrologic systems change in response to a variety of natural and human forces such as climate variability and change, water use and water infrastructure, and land cover change. In turn, changes in hydrologic systems impact socioeconomic, ecological, and climate systems at a number of scales, leading to a coevolution o…	Vogel, R.M.; Department of Civil and Environmental Engineering, Tufts UniversityUnited States	2015	51	6	4409	4430		10.1002/2015WR017049			Scopus
Baker T.J., Cullen B., Debevec L., Abebe Y.	A socio-hydrological approach for incorporating gender into biophysical models and implications for water resources research	Applied Geography	Ecosystem services; Ethiopia; Participatory mapping; SWAT; Women	Men and women interact with water resources and landscapes in different ways, and there are frequent criticisms that little research is undertaken across disciplines to address this issue. Biophysical scientists in particular struggle with how to integrate "gendered" water uses into models that are necessarily based on prevailing laws and equations that describe the movement of water through the …	Baker, T.J.; IWMI-East Africa and Nile Basin, C/o ILRI, P.O. Box 5689, Ethiopia	2015	62		325	338		10.1016/j.apgeog.2015.05.008			Scopus
Doyle M.W., Singh J., Lave R., Robertson M.M.	The morphology of streams restored for market and nonmarket purposes: Insights from a mixed natural-social science approach	Water Resources Research	geomorphology; restoration; sociohydrology	We use geomorphic surveys to quantify the differences between restored and nonrestored streams, and the difference between streams restored for market purposes (compensatory mitigation) from those restored for nonmarket programs. We also analyze the social and political-economic drivers of the stream restoration and mitigation industry using analysis of policy documents and interviews with key pe…	Doyle, M.W.; Nicholas School of the Environment, Duke UniversityUnited States	2015	51	7	5603	5622		10.1002/2015WR017030			Scopus
Bierkens M.F.P.	Global hydrology 2015: State, trends, and directions	Water Resources Research	climate; global hydrology; review; sociohydrology; vegetation	Global hydrology has come a long way since the first introduction of the primitive land surface model of Manabe (1969) and the declaration of the "Emergence of Global Hydrology" by Eagleson (1986). Hydrological submodels of varying complexity are now part of global climate models, of models calculating global terrestrial carbon sequestration, of earth system models, and even of integrated assessm…	Bierkens, M.F.P.; Department of Physical Geography, Utrecht UniversityNetherlands	2015	51	7	4923	4947		10.1002/2015WR017173			Scopus
Wheater H.S., Gober P.	Water security and the science agenda	Water Resources Research	large-scale observatory; modeling and decision support systems; science-policy interface; socio-hydrology; trans-disciplinary water science; water security	The freshwater environment is facing unprecedented global pressures. Unsustainable use of surface and groundwater is ubiquitous. Gross pollution is seen in developing economies, nutrient pollution is a global threat to aquatic ecosystems, and flood damage is increasing. Droughts have severe local consequences, but effects on food can be global. These current pressures are set in the context of ra…	Wheater, H.S.; Global Institute for Water Security, National Hydrology Research Centre, University of SaskatchewanCanada	2015	51	7	5406	5424		10.1002/2015WR016892			Scopus
Troy T.J., Pavao-Zuckerman M., Evans T.P.	Debates - Perspectives on socio-hydrology: Socio-hydrologic modeling: Tradeoffs, hypothesis testing, and validation	Water Resources Research	coupled dynamics; hydrologic modeling; socio-hydrology	Socio-hydrology focuses on studying the dynamics and co-evolution of coupled human and water systems. Recently, several new socio-hydrologic models have been published that explore these dynamics, and these models offer unique opportunities to better understand these coupled systems and to understand how water problems evolve similarly in different regions. These models also offer challenges, as …	Troy, T.J.; Department of Civil and Environmental Engineering, Lehigh UniversityUnited States	2015	51	6	4806	4814		10.1002/2015WR017046			Scopus
Gober P., Wheater H.S.	Debates - Perspectives on socio-hydrology: Modeling flood risk as a public policy problem	Water Resources Research	decision making under uncertainty; floodplain management; knowledge translation; natural hazards; simulation modeling; socio-hydrology	Socio-hydrology views human activities as endogenous to water system dynamics; it is the interaction between human and biophysical processes that threatens the viability of current water systems through positive feedbacks and unintended consequences. Di Baldassarre et al. implement socio-hydrology as a flood risk problem using the concept of social memory as a vehicle to link human perceptions to…	Gober, P.; School of Geographical Sciences and Urban Planning, Decision Center for A Desert City, Arizona State UniversityUnited States	2015	51	6	4782	4788		10.1002/2015WR016945			Scopus
Sivapalan M.	Debates - Perspectives on socio-hydrology: Changing water systems and the "tyranny of small problems" - Socio-hydrology	Water Resources Research	coupled human-water systems; long-term dynamics; modeling; predictions and predictability; socio-hydrology	We are well and truly in the Anthropocene. Humans can no longer be considered as mere external drivers or boundary conditions in the hydrologic systems we study. The interactions and feedbacks between human actions and water cycle dynamics on the planet, combined with the evolution of human norms/values in relation to water, are throwing up a range of emergent "big problems." Understanding and of…	Sivapalan, M.; Hydrosystems Laboratory, Department of Civil and Environmental Engineering, University of Illinois at Urbana-ChampaignUnited States	2015	51	6	4795	4805		10.1002/2015WR017080			Scopus
Srinivasan V., Thompson S., Madhyastha K., Penny G., Jeremiah K., Lele S.	Why is the Arkavathy River drying? A multiple-hypothesis approach in a data-scarce region	Hydrology and Earth System Sciences		Water planning decisions are only as good as our ability to explain historical trends and make reasonable predictions of future water availability. But predicting water availability can be a challenge in rapidly growing regions, where human modifications of land and waterscapes are changing the hydrologic system. Yet, many regions of the world lack the long-term hydrologic monitoring records need…	Srinivasan, V.; Ashoka Trust for Research in Ecology and the Environment, Jakkur Post, India; email: veena.srinivasan@atree.org	2015	19	4	1905	1917		10.5194/hess-19-1905-2015			Scopus
Hale R.L., Armstrong A., Baker M.A., Bedingfield S., Betts D., Buahin C., Buchert M., Crowl T., Dupont R.R., Ehleringer J.R., Endter-Wada J., Flint C., Grant J., Hinners S., Horsburgh J.S., Jackson-Smith D., Jones A.S., Licon C., Null S.E., Odame A., Pataki D.E., Rosenberg D., Runburg M., Stoker P., Strong C.	iSAW: Integrating Structure, Actors, and Water to study socio-hydro-ecological systems	Earth's Future	framework; human-water system; sociohydrology	Urbanization, climate, and ecosystem change represent major challenges for managing water resources. Although water systems are complex, a need exists for a generalized representation of these systems to identify important components and linkages to guide scientific inquiry and aid water management. We developed an integrated Structure-Actor-Water framework (iSAW) to facilitate the understanding …	Hale, R.L.; Global Change and Sustainability Center, United States; email: rebecca.l.hale@utah.edu	2015	3	3	110	132		10.1002/2014EF000295			Scopus
Liu D., Tian F., Lin M., Sivapalan M.	A conceptual socio-hydrological model of the co-evolution of humans and water: Case study of the Tarim River basin, western China	Hydrology and Earth System Sciences		The complex interactions and feedbacks between humans and water are critically important issues but remain poorly understood in the newly proposed discipline of socio-hydrology (Sivapalan et al., 2012). An exploratory model with the appropriate level of simplification can be valuable for improving our understanding of the co-evolution and self-organization of socio-hydrological systems driven by …	Tian, F.; Department of Hydraulic Engineering, State Key Laboratory of Hydroscience and Engineering, Tsinghua UniversityChina	2015	19	2	1035	1054		10.5194/hess-19-1035-2015			Scopus
Srinivasan V.	Reimagining the past - Use of counterfactual trajectories in socio-hydrological modelling: The case of Chennai, India	Hydrology and Earth System Sciences		The developing world is rapidly urbanizing. One of the challenges associated with this growth will be to supply water to growing cities of the developing world. Traditional planning tools fare poorly over 30-50 year time horizons because these systems are changing so rapidly. Models that hold land use, economic patterns, governance systems or technology static over a long planning horizon could r…	Srinivasan, V.; Ashoka Trust for Research in Ecology and the Environment, India; email: veena.srinivasan@atree.org	2015	19	2	785	801		10.5194/hess-19-785-2015			Scopus
Parveen S., Winiger M., Schmidt S., Nüsser M.	Irrigation in Upper Hunza: Evolution of socio-hydrological interactions in the Karakoram, northern Pakistan	Erdkunde	Glacier change; High mountains; Irrigation systems; Livelihoods; Pakistan	Based on three case studies, this paper describes and analyzes the structure and dynamics of irrigation systems in Upper Hunza, located in the western Karakoram, Pakistan. In these deeply incised and arid valleys, glacier and snow melt-water are the primary water sources for agricultural production. The study shows how glacio-fluvial dynamics impact upon irrigation systems and land use practices,…		2015	69	1	69	85		10.3112/erdkunde.2015.01.05			Scopus
Wilson N.J., Todd Walter M., Waterhouse J.	Indigenous knowledge of hydrologic change in the Yukon river basin: A case study of Ruby, Alaska	Arctic	Climate change; Indigenous knowledge of water; River dynamics; Socio-hydrology; Water resources	In the Arctic and Subarctic, the contribution of Indigenous knowledge to understanding environmental change has been established over the last several decades. This paper explores the role of Indigenous knowledge of water in understanding hydrologic change within complex social-ecological systems. Observations of hydrology in the Yukon River Basin, contributed by 20 community experts from Ruby Vi…		2015	68	1	93	106		10.14430/arctic4459			Scopus
Hunter C., Gironás J., Bolster D., Karavitis C.A.	A dynamic, multivariate sustainability measure for robust analysis of water management under climate and demand uncertainty in an arid environment	Water (Switzerland)	Arid zone hydrology; Climate change; Groundwater; Predicative modeling; Sociohydrology; Sustainability assessment; System analysis; Vulnerability; Water supply; Watershed modeling	Considering water resource scarcity and uncertainty in climate and demand futures, decision-makers require techniques for sustainability analysis in resource management. Through unclear definitions of "sustainability", however, traditional indices for resource evaluation propose options of limited flexibility by adopting static climate and demand scenarios, limiting analysis variables to a partic…	Hunter, C.; Departamento de Ingeniería Hidráulica y Ambiental, Av. Vicuña Mackenna, Chile; email: ckhunter@uc.cl	2015	7	11	5928	5958		10.3390/w7115928			Scopus
Klassert C., Sigel K., Gawel E., Klauer B.	Modeling residential water consumption in amman: The role of intermittency, storage, and pricing for piped and tanker water	Water (Switzerland)	Agent-based model; Consumer surplus; Demand-side policies; Household water consumption; Hydro-economics; Intermittent supply; Jordan; Long-term sustainability; Socio-hydrology; Water scarcity; Water tankers	Jordan faces an archetypal combination of high water scarcity, with a per capita water availability of around 150 m3 per year significantly below the absolute scarcity threshold of 500 m3, and strong population growth, especially due to the Syrian refugee crisis. A transition to more sustainable water consumption patterns will likely require Jordan's water authorities to rely more strongly on wat…	Klassert, C.; Department of Economics, Permoserstr. 15, Germany	2015	7	7	3643	3670		10.3390/w7073643			Scopus
Rushforth R.R., Ruddell B.L.	The hydro-economic interdependency of cities: Virtual water connections of the Phoenix, Arizona Metropolitan Area	Sustainability (Switzerland)	Commodity flows; Cooperative water resources management; Coupled natural-human systems; Economic networks; Hydro-economics; Metropolitan area; Science of cities; Socio-hydrology; Urban metabolism; Urban water footprint; Virtual water; Water infrastructure	Water footprinting has revealed hydro-economic interdependencies between distant global geographies via trade, especially of agricultural and manufactured goods. However, for metropolitan areas, trade not only entails commodity flows at many scales from intra-municipal to global, but also substantial intra-metropolitan flows of the skilled labor that is essential to a city's high-value economy. V…	Rushforth, R.R.; Fulton Schools of Engineering, Arizona State UniversityUnited States	2015	7	7	8522	8547		10.3390/su7078522			Scopus
Zhang, HB; Singh, VP; Bin Wang, B; Yu, YH	CEREF: A hybrid data-driven model for forecasting annual streamflow from a socio-hydrological system	JOURNAL OF HYDROLOGY	Hybrid forecasting model; Empirical mode decomposition; Non-stationary time series; Annual streamflow; Water demand; Wuding River basin	Hydrological forecasting is complicated by flow regime alterations in a coupled socio-hydrologic system, encountering increasingly non-stationary, nonlinear and irregular changes, which make decision support difficult for future water resources management. Currently, many hybrid data-driven models, based on the decomposition-prediction-reconstruction principle, have been developed to improve the …	hbzhang@chd.edu.cn; vsingh@tamu.edu; likekobe2009@qq.com; 470451650@qq.com	2016	540		246	256		10.1016/j.jhydrol.2016.06.029	Engineering, Civil; Geosciences, Multidisciplinary; Water Resources	Engineering; Geology; Water Resources	WoS
Grames, J; Prskawetz, A; Grass, D; Viglione, A; Bloschl, G	Modeling the interaction between flooding events and economic growth	ECOLOGICAL ECONOMICS	Flood; Socio-hydrology; Dynamic optimization; Investment strategy	Recently socio-hydrology models have been proposed to analyze the interplay of community risk-coping culture, flooding damage and economic growth. These models descriptively explain the feedbacks between socio-economic development and natural disasters such as floods. Complementary to these descriptive models, we develop a dynamic optimization model, where the inter-temporal decision of an econom…	johanna.grames@tuwien.ac.at	2016	129		193	209		10.1016/j.ecolecon.2016.06.014	Ecology; Economics; Environmental Sciences; Environmental Studies	Environmental Sciences & Ecology; Business & Economics	WoS
Kuil, L; Carr, G; Viglione, A; Prskawetz, A; Bloschl, G	Conceptualizing socio-hydrological drought processes: The case of the Maya collapse	WATER RESOURCES RESEARCH	socio-hydrology; Ancient Maya; drought; vulnerability	With population growth, increasing water demands and climate change the need to understand the current and future pathways to water security is becoming more pressing. To contribute to addressing this challenge, we examine the link between water stress and society through socio-hydrological modeling. We conceptualize the interactions between an agricultural society with its environment in a styli…	kuil@waterresources.at	2016	52	8	6222	6242		10.1002/2015WR018298	Environmental Sciences; Limnology; Water Resources	Environmental Sciences & Ecology; Marine & Freshwater Biology; Water Resources	WoS
Di Baldassarre, G; Brandimarte, L; Beven, K	The seventh facet of uncertainty: wrong assumptions, unknowns and surprises in the dynamics of human-water systems	HYDROLOGICAL SCIENCES JOURNAL-JOURNAL DES SCIENCES HYDROLOGIQUES	Epistemic uncertainty; socio-hydrology; black swans; disaster risk reduction; resilience	The scientific literature has focused on uncertainty as randomness, while limited credit has been given to what we call here the seventh facet of uncertainty, i.e. lack of knowledge. This paper identifies three types of lack of understanding: (i) known unknowns, which are things we know we don't know; (ii) unknown unknowns, which are things we don't know we don't know; and (iii) wrong assumptions…	giuliano.dibaldassarre@geo.uu.se	2016	61	9	1748	1758		10.1080/02626667.2015.1091460	Water Resources	Water Resources	WoS
Bark, RH; Robinson, CJ; Flessa, KW	Tracking cultural ecosystem services: water chasing the Colorado River restoration pulse flow	ECOLOGICAL ECONOMICS	Transboundary; Restoration; Pulse flow; Social values; Socio-hydrology; Monitoring; Cultural ecosystem services; Public good	The release of environmental flows for ecological restoration is a challenge for water policymakers and managers as it involves complex trade-offs between productive and ecosystem uses of water. While it is crucial to demonstrate that such environmental flows produce the desired hydro-ecological results, allocation of environmental water is also influenced by perceived social values of this water…	R.H.Bark@leeds.ac.uk; Catherine.Robinson@csiro.au; kflessa@email.arizona.edu	2016	127		165	172		10.1016/j.ecolecon.2016.03.009	Ecology; Economics; Environmental Sciences; Environmental Studies	Environmental Sciences & Ecology; Business & Economics	WoS
Elshafei, Y; Tonts, M; Sivapalan, M; Hipsey, MR	Sensitivity of emergent sociohydrologic dynamics to internal system properties and external sociopolitical factors: Implications for water management	WATER RESOURCES RESEARCH	sociohydrology; threshold behavior; adaptive water resource management; social responses; coupled system feedbacks; coupled human-water systems	It is increasingly acknowledged that effective management of water resources requires a holistic understanding of the coevolving dynamics inherent in the coupled human-hydrology system. One of the fundamental information gaps concerns the sensitivity of coupled system feedbacks to various endogenous system properties and exogenous societal contexts. This paper takes a previously calibrated socioh…	yasmina.elshafei@research.uwa.edu.au	2016	52	6	4944	4966		10.1002/2015WR017944	Environmental Sciences; Limnology; Water Resources	Environmental Sciences & Ecology; Marine & Freshwater Biology; Water Resources	WoS
Jeong, H; Adamowski, J	A system dynamics based socio-hydrological model for agricultural wastewater reuse at the watershed scale	AGRICULTURAL WATER MANAGEMENT	System dynamics modeling; Korea; Socio-hydrology; Socio-hydrological modeling; Urbanization; Wastewater reuse	The purpose of this study was to develop and verify a socio-hydrological model using system dynamics (SD), thereby combining a deterministic conceptual hydrological model and a social model incorporating population, land use, economics, technology, and policy dimensions. Applied to a central South Korean watershed where wastewater is reused for paddy irrigation, the present model was verified in …	jan.adamowski@mcgill.ca	2016	171		89	107		10.1016/j.agwat.2016.03.019	Agronomy; Water Resources	Agriculture; Water Resources	WoS
Pande, S; Savenije, HHG	A sociohydrological model for smallholder farmers in Maharashtra, India	WATER RESOURCES RESEARCH	smallholder; sociohydrology	We present a sociohydrological model that can help us to better understand the system dynamics of a smallholder farmer. It couples the dynamics of the six main assets of a typical smallholder farmer: water storage capacity, capital, livestock, soil fertility, grazing access, and labor. The hydroclimatic variability, which is a main driver and source of uncertainty of the smallholder system, is ac…	s.pande@tudelft.nl	2016	52	3	1923	1947		10.1002/2015WR017841	Environmental Sciences; Limnology; Water Resources	Environmental Sciences & Ecology; Marine & Freshwater Biology; Water Resources	WoS
Chen, X; Wang, DB; Tian, FQ; Sivapalan, M	From channelization to restoration: Sociohydrologic modeling with changing community preferences in the Kissimmee River Basin, Florida	WATER RESOURCES RESEARCH	sociohydrology; human values; modeling; power dynamics; flooding; wetland restoration	The Kissimmee River Basin (Florida, USA) underwent river channelization in the 1960s and subsequent restoration in the 1990s, revealing a shift in management emphasis from flood protection to wetland health. In this paper, this shift is hypothesized to result from changing human values and preferences, and a power differential between the more numerous and affluent upstream urban residents (who p…	xchen554@wisc.edu	2016	52	2	1227	1244		10.1002/2015WR018194	Environmental Sciences; Limnology; Water Resources	Environmental Sciences & Ecology; Marine & Freshwater Biology; Water Resources	WoS
Garcia, M; Portney, K; Islam, S	A question driven socio-hydrological modeling process	HYDROLOGY AND EARTH SYSTEM SCIENCES		Human and hydrological systems are coupled: human activity impacts the hydrological cycle and hydrological conditions can, but do not always, trigger changes in human systems. Traditional modeling approaches with no feedback between hydrological and human systems typically cannot offer insight into how different patterns of natural variability or human-induced changes may propagate through this c…	margaret.garcia@tufts.edu	2016	20	1	73	92		10.5194/hess-20-73-2016	Geosciences, Multidisciplinary; Water Resources	Geology; Water Resources	WoS
McMillan, H; Montanari, A; Cudennec, C; Savenije, H; Kreibich, H; Krueger, T; Liu, J; Mejia, A; Van Loon, A; Aksoy, H; Di Baldassarre, G; Huang, Y; Mazvimavi, D; Rogger, M; Sivakumar, B; Bibikova, T; Castellarin, A; Chen, YB; Finger, D; Gelfan, A; Hannah, DM; Hoekstra, AY; Li, HY; Maskey, S; Mathevet, T; Mijic, A; Acuna, AP; Polo, MJ; Rosales, V; Smith, P; Viglione, A; Srinivasan, V; Toth, E; Van…	Panta Rhei 2013-2015: global perspectives on hydrology, society and change	HYDROLOGICAL SCIENCES JOURNAL-JOURNAL DES SCIENCES HYDROLOGIQUES	Panta Rhei; hydrological decade; socio-hydrology; climate change; human impacts; global hydrology; water resources; water security; society	In 2013, the International Association of Hydrological Sciences (IAHS) launched the hydrological decade 2013-2022 with the theme Panta Rhei: Change in Hydrology and Society. The decade recognizes the urgency of hydrological research to understand and predict the interactions of society and water, to support sustainable water resource use under changing climatic and environmental conditions. This …	h.mcmillan@niwa.co.nz	2016	61	7	1174	1191		10.1080/02626667.2016.1159308	Water Resources	Water Resources	WoS
Mount, NJ; Maier, HR; Toth, E; Elshorbagy, A; Solomatine, D; Chang, FJ; Abrahart, RJ	Data-driven modelling approaches for socio-hydrology: opportunities and challenges within the Panta Rhei Science Plan	HYDROLOGICAL SCIENCES JOURNAL-JOURNAL DES SCIENCES HYDROLOGIQUES	data-driven; hydrologic modelling; socio-hydrology; hypothesis; conceptual modelling; knowledge extraction	Panta Rhei - Everything Flows is the science plan for the International Association of Hydrological Sciences scientific decade 2013-2023. It is founded on the need for improved understanding of the mutual, two-way interactions occurring at the interface of hydrology and society, and their role in influencing future hydrologic system change. It calls for strategic research effort focused on the de…	nick.mount@nottingham.ac.uk	2016	61	7	1192	1208		10.1080/02626667.2016.1159683	Water Resources	Water Resources	WoS
Ceola S., Montanari A., Krueger T., Dyer F., Kreibich H., Westerberg I., Carr G., Cudennec C., Elshorbagy A., Savenije H., Van Der Zaag P., Rosbjerg D., Aksoy H., Viola F., Petrucci G., MacLeod K., Croke B., Ganora D., Hermans L., Polo M.J., Xu Z., Borga M., Helmschrot J., Toth E., Ranzi R., Castellarin A., Hurford A., Brilly M., Viglione A., Blöschl G., Sivapalan M., Domeneghetti A., Marinelli A…	Adaptation of water resources systems to changing society and environment: a statement by the International Association of Hydrological Sciences	Hydrological Sciences Journal	bottom-up approach; catchment; resilient design; socio-hydrology; water resources systems	We explore how to address the challenges of adaptation of water resources systems under changing conditions by supporting flexible, resilient and low-regret solutions, coupled with on-going monitoring and evaluation. This will require improved understanding of the linkages between biophysical and social aspects in order to better anticipate the possible future co-evolution of water systems and so…	Ceola, S.; Department of Civil, Italy; email: serena.ceola@unibo.it	2016	61	16	2803	2817		10.1080/02626667.2016.1230674			Scopus
Grames J., Prskawetz A., Grass D., Viglione A., Blöschl G.	Modeling the interaction between flooding events and economic growth	Ecological Economics	Dynamic optimization; Flood; Investment strategy; Socio-hydrology	Recently socio-hydrology models have been proposed to analyze the interplay of community risk-coping culture, flooding damage and economic growth. These models descriptively explain the feedbacks between socio-economic development and natural disasters such as floods. Complementary to these descriptive models, we develop a dynamic optimization model, where the inter-temporal decision of an econom…	Grames, J.; Centre for Water Resource Systems, Austria; email: johanna.grames@tuwien.ac.at	2016	129		193	209		10.1016/j.ecolecon.2016.06.014			Scopus
Zhang H., Singh V.P., Wang B., Yu Y.	CEREF: A hybrid data-driven model for forecasting annual streamflow from a socio-hydrological system	Journal of Hydrology	Annual streamflow; Empirical mode decomposition; Hybrid forecasting model; Non-stationary time series; Water demand; Wuding River basin	Hydrological forecasting is complicated by flow regime alterations in a coupled socio-hydrologic system, encountering increasingly non-stationary, nonlinear and irregular changes, which make decision support difficult for future water resources management. Currently, many hybrid data-driven models, based on the decomposition–prediction-reconstruction principle, have been developed to improve the …	Zhang, H.No. 126 Yanta RoadYanta District, China; email: hbzhang@chd.edu.cn	2016	540		246	256		10.1016/j.jhydrol.2016.06.029			Scopus
Kuil L., Carr G., Viglione A., Prskawetz A., Blöschl G.	Conceptualizing socio-hydrological drought processes: The case of the Maya collapse	Water Resources Research	Ancient Maya; drought; socio-hydrology; vulnerability	With population growth, increasing water demands and climate change the need to understand the current and future pathways to water security is becoming more pressing. To contribute to addressing this challenge, we examine the link between water stress and society through socio-hydrological modeling. We conceptualize the interactions between an agricultural society with its environment in a styli…	Kuil, L.; Centre for Water Resource Systems, Austria; email: kuil@waterresources.at	2016	52	8	6222	6242		10.1002/2015WR018298			Scopus
Di Baldassarre G., Brandimarte L., Beven K.	The seventh facet of uncertainty: Wrong assumptions, unknowns and surprises in the dynamics of human–water systems	Hydrological Sciences Journal	Black swans; Disaster risk reduction; Epistemic uncertainty; Resilience; Socio-hydrology	The scientific literature has focused on uncertainty as randomness, while limited credit has been given to what we call here the “seventh facet of uncertainty”, i.e. lack of knowledge. This paper identifies three types of lack of understanding: (i) known unknowns, which are things we know we don’t know; (ii) unknown unknowns, which are things we don’t know we don’t know; and (iii) wrong assumptio…	Di Baldassarre, G.; Department of Earth Sciences, Sweden; email: giuliano.dibaldassarre@geo.uu.se	2016	61	9	1748	1758		10.1080/02626667.2015.1091460			Scopus
Bark R.H., Robinson C.J., Flessa K.W.	Tracking cultural ecosystem services: Water chasing the Colorado River restoration pulse flow	Ecological Economics	Cultural ecosystem services; Monitoring; Public good; Pulse flow; Restoration; Social values; Socio-hydrology; Transboundary	The release of environmental flows for ecological restoration is a challenge for water policymakers and managers as it involves complex trade-offs between productive and ecosystem uses of water. While it is crucial to demonstrate that such environmental flows produce the desired hydro-ecological results, allocation of environmental water is also influenced by perceived social values of this water…	Bark, R.H.; Marie Skłodowska-Curie Fellow, United Kingdom; email: R.H.Bark@leeds.ac.uk	2016	127		165	172		10.1016/j.ecolecon.2016.03.009			Scopus
Jeong H., Adamowski J.	A system dynamics based socio-hydrological model for agricultural wastewater reuse at the watershed scale	Agricultural Water Management	Korea; Socio-hydrological modeling; Socio-hydrology; System dynamics modeling; Urbanization; Wastewater reuse	The purpose of this study was to develop and verify a socio-hydrological model using system dynamics (SD), thereby combining a deterministic conceptual hydrological model and a social model incorporating population, land use, economics, technology, and policy dimensions. Applied to a central South Korean watershed where wastewater is reused for paddy irrigation, the present model was verified in …	Adamowski, J.; Department of Bioresource Engineering, 21 111 Lakeshore Road, Canada; email: jan.adamowski@mcgill.ca	2016	171		89	107		10.1016/j.agwat.2016.03.019			Scopus
Elshafei Y., Tonts M., Sivapalan M., Hipsey M.R.	Sensitivity of emergent sociohydrologic dynamics to internal system properties and external sociopolitical factors: Implications for water management	Water Resources Research	adaptive water resource management; coupled human-water systems; coupled system feedbacks; social responses; sociohydrology; threshold behavior	It is increasingly acknowledged that effective management of water resources requires a holistic understanding of the coevolving dynamics inherent in the coupled human-hydrology system. One of the fundamental information gaps concerns the sensitivity of coupled system feedbacks to various endogenous system properties and exogenous societal contexts. This paper takes a previously calibrated socioh…	Elshafei, Y.; School of Earth and Environment, Australia; email: yasmina.elshafei@research.uwa.edu.au	2016	52	6	4944	4966		10.1002/2015WR017944			Scopus
Levy M.C., Garcia M., Blair P., Chen X., Gomes S.L., Gower D.B., Grames J., Kuil L., Liu Y., Marston L., Mccord P.F., Roobavannan M., Zeng R.	Wicked but worth it: Student perspectives on socio-hydrology	Hydrological Processes		[No abstract available]	Levy, M.C.; Energy and Resources Group, United States; email: mclevy@berkeley.edu	2016	30	9	1467	1472		10.1002/hyp.10791			Scopus
McMillan H., Montanari A., Cudennec C., Savenije H., Kreibich H., Krueger T., Liu J., Mejia A., Van Loon A., Aksoy H., Di Baldassarre G., Huang Y., Mazvimavi D., Rogger M., Sivakumar B., Bibikova T., Castellarin A., Chen Y., Finger D., Gelfan A., Hannah D.M., Hoekstra A.Y., Li H., Maskey S., Mathevet T., Mijic A., Acuña A.P., Polo M.J., Rosales V., Smith P., Viglione A., Srinivasan V., Toth E., v…	Panta Rhei 2013-2015: Global perspectives on hydrology, society and change	Hydrological Sciences Journal	Climate change; Global hydrology; Human impacts; Hydrological decade; Panta Rhei; Society; Socio-hydrology; Water resources; Water security	In 2013, the International Association of Hydrological Sciences (IAHS) launched the hydrological decade 2013-2022 with the theme “Panta Rhei: Change in Hydrology and Society”. The decade recognizes the urgency of hydrological research to understand and predict the interactions of society and water, to support sustainable water resource use under changing climatic and environmental conditions. Thi…	McMillan, H.; National Institute for Water and Atmospheric ResearchNew Zealand; email: h.mcmillan@niwa.co.nz	2016	61	7	1174	1191		10.1080/02626667.2016.1159308			Scopus
Pande S., Savenije H.H.G.	A sociohydrological model for smallholder farmers in Maharashtra, India	Water Resources Research	smallholder; sociohydrology	We present a sociohydrological model that can help us to better understand the system dynamics of a smallholder farmer. It couples the dynamics of the six main assets of a typical smallholder farmer: water storage capacity, capital, livestock, soil fertility, grazing access, and labor. The hydroclimatic variability, which is a main driver and source of uncertainty of the smallholder system, is ac…	Pande, S.; Department of Water Management, Netherlands; email: s.pande@tudelft.nl	2016	52	3	1923	1947		10.1002/2015WR017841			Scopus
Chen X., Wang D., Tian F., Sivapalan M.	From channelization to restoration: Sociohydrologic modeling with changing community preferences in the Kissimmee River Basin, Florida	Water Resources Research	flooding; human values; modeling; power dynamics; sociohydrology; wetland restoration	The Kissimmee River Basin (Florida, USA) underwent river channelization in the 1960s and subsequent restoration in the 1990s, revealing a shift in management emphasis from flood protection to wetland health. In this paper, this shift is hypothesized to result from changing human values and preferences, and a power differential between the more numerous and affluent upstream urban residents (who p…	Chen, X.; Center for Sustainability and the Global Environment, United States; email: xchen554@wisc.edu	2016	52	2	1227	1244		10.1002/2015WR018194			Scopus
Blair P., Buytaert W.	Socio-hydrological modelling: A review asking "why, what and how?"	Hydrology and Earth System Sciences		Interactions between humans and the environment are occurring on a scale that has never previously been seen; the scale of human interaction with the water cycle, along with the coupling present between social and hydrological systems, means that decisions that impact water also impact people. Models are often used to assist in decision-making regarding hydrological systems, and so in order for e…	Blair, P.; Grantham Institute, United Kingdom; email: peter.blair14@imperial.ac.uk	2016	20	1	443	478		10.5194/hess-20-443-2016			Scopus
Garcia M., Portney K., Islam S.	A question driven socio-hydrological modeling process	Hydrology and Earth System Sciences		Human and hydrological systems are coupled: human activity impacts the hydrological cycle and hydrological conditions can, but do not always, trigger changes in human systems. Traditional modeling approaches with no feedback between hydrological and human systems typically cannot offer insight into how different patterns of natural variability or human-induced changes may propagate through this c…	Garcia, M.; Civil and Environmental Engineering Department, 200 College Avenue, United States; email: margaret.garcia@tufts.edu	2016	20	1	73	92		10.5194/hess-20-73-2016			Scopus
Mount N.J., Maier H.R., Toth E., Elshorbagy A., Solomatine D., Chang F.-J., Abrahart R.J.	Data-driven modelling approaches for socio-hydrology: Opportunities and challenges within the Panta Rhei Science Plan	Hydrological Sciences Journal	Conceptual modelling; Data-driven; Hydrologic modelling; Hypothesis; Knowledge extraction; Socio-hydrology	“Panta Rhei - Everything Flows” is the science plan for the International Association of Hydrological Sciences scientific decade 2013-2023. It is founded on the need for improved understanding of the mutual, two-way interactions occurring at the interface of hydrology and society, and their role in influencing future hydrologic system change. It calls for strategic research effort focused on the …	Mount, N.J.; School of Geography, University Park, United Kingdom; email: nick.mount@nottingham.ac.uk	2016	61	7	1192	1208		10.1080/02626667.2016.1159683			Scopus
Alifujiang, Y; Abuduwaili, J; Ma, L; Samat, A; Groll, M	System Dynamics Modeling of Water Level Variations of Lake Issyk-Kul, Kyrgyzstan	WATER	main driving factors; water level simulation; SD model; sensitivity analysis; scenario analysis; Lake Issyk-Kul; arid Central Asia	Lake Issyk-Kul is an important endorheic lake in arid Central Asia. Climate change, anthropogenic water consumption and a complex basin hydrology with interlocked driving forces have led to a high variability of the water balance and an overall trend of decreasing lake water levels. The main objective of this study was to investigate these main driving forces and their interactions with the lake'…	yilinueralifujiang15@mails.ucas.ac.cn; jilil@ms.xjb.ac.cn; malong@ms.xjb.ac.cn; alim_smt@ms.xjb.ac.cn; mgroll@gmx.net	2017	9	12			989	10.3390/w9120989	Environmental Sciences; Water Resources	Environmental Sciences & Ecology; Water Resources	WoS
Evers, M; Hollermann, B; Almoradie, ADS; Santos, GG; Taft, L	The Pluralistic Water Research Concept: A New Human-Water System Research Approach	WATER	human-water research; socio-hydrology; pluralistic approach; conceptual model	The use and management of water systems is influenced by a number of factors, such as economic growth, global change (e.g., urbanization, hydrological-climatic changes), politics, history and culture. Despite noteworthy efforts to develop integrative approaches to analyze water-related problems, human-water research remains a major challenge for scholars and decision makers due to the increasing …	mariele.evers@uni-bonn.de; bhoellermann@uni-bonn.de; adrian.almoradie@uni-bonn.de; Glenda.GarciaSantos@aau.at; ltaft@uni-bonn.de	2017	9	12			933	10.3390/w9120933	Environmental Sciences; Water Resources	Environmental Sciences & Ecology; Water Resources	WoS
Schifman, LA; Herrmann, DL; Shuster, WD; Ossola, A; Garmestani, A; Hopton, ME	Situating Green Infrastructure in Context: A Framework for Adaptive Socio-Hydrology in Cities	WATER RESOURCES RESEARCH		Management of urban hydrologic processes using green infrastructure (GI) has largely focused on storm water management. Thus, design and implementation of GI usually rely on physical site characteristics and local rainfall patterns, and do not typically account for human or social dimensions. This traditional approach leads to highly centralized storm water management in a disconnected urban land…	shuster.william@epa.gov	2017	53	12	10139	10154		10.1002/2017WR020926	Environmental Sciences; Limnology; Water Resources	Environmental Sciences & Ecology; Marine & Freshwater Biology; Water Resources	WoS
Apurv, T; Sivapalan, M; Cai, XM	Understanding the Role of Climate Characteristics in Drought Propagation	WATER RESOURCES RESEARCH	drought propagation; groundwater depletion; socio-hydrology; climate controls; seasonality; model diagnostics	In this study, we use numerical experiments with a simple water balance model to understand the roles of key climate characteristics in hydrologic drought propagation and the consequence of human responses to drought events under different climates. The experiments use climate inputs from a range of places with a hypothetical catchment of fixed properties to study drought propagation under differ…	apurv2@illinois.edu	2017	53	11	9304	9329		10.1002/2017WR021445	Environmental Sciences; Limnology; Water Resources	Environmental Sciences & Ecology; Marine & Freshwater Biology; Water Resources	WoS
Ramsey, E; Berglund, EZ; Goyal, R	The Impact of Demographic Factors, Beliefs, and Social Influences on Residential Water Consumption and Implications for Non-Price Policies in Urban India	WATER	residential water consumption; water conservation; water scarcity; water demand management; non-price policies; socio-hydrology; household survey; social norms; South Asia; India	In rapidly growing urban areas in India and the developing world, water demands typically exceed supply. While local governments may implement management programs to reduce demand for freshwater, water savings are dependent on the conservation behaviors of individuals. A household survey is presented here to examine residential water end uses and conservation behaviors in Jaipur, India. The surve…	evramsey@ncsu.edu; emily_berglund@ncsu.edu; rgoyal.ce@mnit.ac.in	2017	9	11			844	10.3390/w9110844	Environmental Sciences; Water Resources	Environmental Sciences & Ecology; Water Resources	WoS
Farjad, B; Pooyandeh, M; Gupta, A; Motamedi, M; Marceau, D	Modelling Interactions between Land Use, Climate, and Hydrology along with Stakeholders' Negotiation for Water Resources Management	SUSTAINABILITY	river basin management; integrated modelling system; land-use change; climate change; watershed modelling; hydrological modelling; socio-hydrology	This paper describes the main functionalities of an integrated framework to model the interactions between land use, climate, and hydrology along with stakeholders' negotiation. Its novelty lies in the combination of individual-based and spatially distributed models within the Socio-Hydrology paradigm to capture the complexity and uncertainty inherent to these systems. It encompasses a land-use/l…	bfarjad@ucalgary.ca; majeed.pooyandeh@ucalgary.ca; Anil.Gupta@gov.ab.ca; motamedi@urdeveloper.com; dmarceau@ucalgary.ca	2017	9	11			2022	10.3390/su9112022	Green & Sustainable Science & Technology; Environmental Sciences; Environmental Studies	Science & Technology - Other Topics; Environmental Sciences & Ecology	WoS
Thompson, S; MacVean, L; Sivapalan, M	A Stochastic Water Balance Framework for Lowland Watersheds	WATER RESOURCES RESEARCH	lowlands; water balance; flood; stochastic; analytic; levee	The water balance dynamics in lowland watersheds are influenced not only by local hydroclimatic controls on energy and water availability, but also by imports of water from the upstream watershed. These imports result in a stochastic extent of inundation in lowland watersheds that is determined by the local flood regime, watershed topography, and the rate of loss processes such as drainage and ev…	sally.thompson@berkeley.edu	2017	53	11	9564	9579		10.1002/2017WR021193	Environmental Sciences; Limnology; Water Resources	Environmental Sciences & Ecology; Marine & Freshwater Biology; Water Resources	WoS
Roobavannan, M; Kandasamy, J; Panda, S; Vigneswaran, S; Sivapalan, M	Role of Sectoral Transformation in the Evolution of Water Management Norms in Agricultural Catchments: A Sociohydrologic Modeling Analysis	WATER RESOURCES RESEARCH		This study is focused on the water-agriculture-environment nexus as it played out in the Murrumbidgee River Basin, eastern Australia, and how coevolution of society and water management actually transpired. Over 100 years of agricultural development the Murrumbidgee Basin experienced a pendulum swing in terms of water allocation, initially exclusively for agriculture production changing over to r…	jaya.kandasamy@uts.edu.au	2017	53	10	8344	8365		10.1002/2017WR020671	Environmental Sciences; Limnology; Water Resources	Environmental Sciences & Ecology; Marine & Freshwater Biology; Water Resources	WoS
Bakarji, J; O'Malley, D; Vesselinov, VV	Agent-Based Socio-Hydrological Hybrid Modeling for Water Resource Management	WATER RESOURCES MANAGEMENT	Sociohydrology; Decision support systems; Computational social dynamics	Hybrid socio-hydrological modeling has become indispensable for managing water resources in an increasingly unstable ecology caused by human activity. Most work on the subject has been focused on either qualitative socio-political recommendations with an unbounded list of vague factors or complex sociological and hydrological models with many assumptions and specialized usability. In this paper, …	jbakarji@stanford.edu	2017	31	12	3881	3898		10.1007/s11269-017-1713-7	Engineering, Civil; Water Resources	Engineering; Water Resources	WoS
Sanderson, MR; Bergtold, JS; Stamm, JLH; Caldas, MM; Ramsey, SM	Bringing the social into sociohydrology: Conservation policy support in the Central Great Plains of Kansas, USA	WATER RESOURCES RESEARCH	sociohydrology; values; culture; conservation; policy	Identifying means of empirically modeling the human component of a coupled, human-water system becomes critically important to further advances in sociohydrology. We develop a social-psychological model of environmental decision making that addresses four key challenges of incorporating social science into integrated models. We use the model to explain preferences for three conservation policies …	mattrs@ksu.edu	2017	53	8	6725	6743		10.1002/2017WR020659	Environmental Sciences; Limnology; Water Resources	Environmental Sciences & Ecology; Marine & Freshwater Biology; Water Resources	WoS
Mao, F; Clark, J; Karpouzoglou, T; Dewulf, A; Buytaert, W; Hannah, D	HESS Opinions: A conceptual framework for assessing socio-hydrological resilience under change	HYDROLOGY AND EARTH SYSTEM SCIENCES		Despite growing interest in resilience, there is still significant scope for increasing its conceptual clarity and practical relevance in socio-hydrological contexts: specifically, questions of how socio-hydrological systems respond to and cope with perturbations and how these connect to resilience remain unanswered. In this opinion paper, we propose a novel conceptual framework for understanding…	f.mao@bham.ac.uk	2017	21	7	3655	3670		10.5194/hess-21-3655-2017	Geosciences, Multidisciplinary; Water Resources	Geology; Water Resources	WoS
Han, SJ; Tian, FQ; Liu, Y; Duan, XH	Socio-hydrological perspectives of the co-evolution of humans and groundwater in Cangzhou, North China Plain	HYDROLOGY AND EARTH SYSTEM SCIENCES		This paper presents a historical analysis from socio-hydrological perspectives of the coupled humangroundwater system of the Cangzhou region in the North China Plain (NCP). The history of the pendulum swing for water allocation between the economic development and aquifer environmental health of the system is divided into five eras (i.e., natural, exploitation, degradation and restoration, drough…	hansj@iwhr.com; tianfq@tsinghua.edu.cn	2017	21	7	3619	3633		10.5194/hess-21-3619-2017	Geosciences, Multidisciplinary; Water Resources	Geology; Water Resources	WoS
Pande, S; Sivapalan, M	Progress in socio-hydrology: a meta-analysis of challenges and opportunities	WILEY INTERDISCIPLINARY REVIEWS-WATER		Socio-hydrology was introduced 4 years ago into the scientific lexicon, and elicited several reactions about the meaning and originality of the concept. However, there has also been much activity triggered by the original paper, including further commentaries that clarified the definitions, and several papers that acted on the definitions, and through these activities further clarified and illust…	s.pande@tudelft.nl	2017	4	4			e1193	10.1002/wat2.1193	Environmental Sciences; Water Resources	Environmental Sciences & Ecology; Water Resources	WoS
Seidl, R; Barthel, R	Linking scientific disciplines: Hydrology and social sciences	JOURNAL OF HYDROLOGY	Interdisciplinarity; Hydrology; Social sciences; Survey; Review; Socio-hydrology	The integration of interdisciplinary scientific and societal knowledge plays an increasing role in sustain ability science and more generally, in global change research. In the field of water resources, interdisciplinarity has long been recognized as crucial. Recently, new concepts and ideas about how to approach water resources management more holistically have been discussed. The emergence of c…	roman.seidl@usys.ethz.ch; roland.barthel@gvc.gu.se	2017	550		441	452		10.1016/j.jhydrol.2017.05.008	Engineering, Civil; Geosciences, Multidisciplinary; Water Resources	Engineering; Geology; Water Resources	WoS
Fuchs, S; Karagiorgos, K; Kitikidou, K; Maris, F; Paparrizos, S; Thaler, T	Flood risk perception and adaptation capacity: a contribution to the socio-hydrology debate	HYDROLOGY AND EARTH SYSTEM SCIENCES		Dealing with flood hazard and risk requires approaches rooted in both natural and social sciences, which provided the nexus for the ongoing debate on sociohydrology. Various combinations of non-structural and structural flood risk reduction options are available to communities. Focusing on flood risk and the information associated with it, developing risk management plans is required but often ov…	sven.fuchs@boku.ac.at	2017	21	6	3183	3198		10.5194/hess-21-3183-2017	Geosciences, Multidisciplinary; Water Resources	Geology; Water Resources	WoS
Roobavannan, M; Kandasamy, J; Pande, S; Vigneswaran, S; Sivapalan, M	Allocating Environmental Water and Impact on Basin Unemployment: Role of A Diversified Economy	ECOLOGICAL ECONOMICS	Socio-hydrology; Agriculture; Environmental water allocation; Unemployment; Diversified economy; Migration	Water diversion for environmental purposes threatens many agricultural communities. This paper focuses on the water-agriculture-environment nexus in the Murrumbidgee River Basin, Australia, and attempts to explain how reduced water allocation to agriculture aimed at protecting the environment in turn impacted the wider economy and the community. Predictably reduced water allocation saw declines i…	jaya.kandasamy@uts.edu.au	2017	136		178	188		10.1016/j.ecolecon.2017.02.006	Ecology; Economics; Environmental Sciences; Environmental Studies	Environmental Sciences & Ecology; Business & Economics	WoS
Ciullo, A; Viglione, A; Castellarin, A; Crisci, M; Di Baldassarre, G	Socio-hydrological modelling of flood-risk dynamics: comparing the resilience of green and technological systems	HYDROLOGICAL SCIENCES JOURNAL-JOURNAL DES SCIENCES HYDROLOGIQUES	flood risk; socio-hydrology; resilience; city of Rome; People's Republic of Bangladesh	This work aims to provide a dynamic assessment of flood risk and community resilience by explicitly accounting for variable human behaviour, e.g. risk-taking and awareness-raising attitudes. We consider two different types of socio-hydrological systems: green systems, whereby societies deal with risk only via non-structural measures, and technological systems, whereby risk is dealt with also by s…	alessio.ciullo@deltares.nl	2017	62	6	880	891		10.1080/02626667.2016.1273527	Water Resources	Water Resources	WoS
McCurley, KL; Jawitz, JW	Hyphenated hydrology: Interdisciplinary evolution of water resource science	WATER RESOURCES RESEARCH		Hydrology has advanced considerably as a scientific discipline since its recognized inception in the mid-twentieth century. Modern water resource related questions have forced adaptation from exclusively physical or engineering science viewpoints toward a deliberate interdisciplinary context. Over the past few decades, many of the eventual manifestations of this evolution were foreseen by promine…	jawitz@ufl.edu	2017	53	4	2972	2982		10.1002/2016WR019835	Environmental Sciences; Limnology; Water Resources	Environmental Sciences & Ecology; Marine & Freshwater Biology; Water Resources	WoS
Srinivasan, V; Sanderson, M; Garcia, M; Konar, M; Bloschl, G; Sivapalan, M	Prediction in a socio-hydrological world	HYDROLOGICAL SCIENCES JOURNAL-JOURNAL DES SCIENCES HYDROLOGIQUES	prediction; socio-hydrology; trajectories; safe operating; modelling; water resources	Water resource management involves public investments with long-ranging impacts that traditional prediction approaches cannot address. These are increasingly being critiqued because (1) there is an absence of feedbacks between water and society; (2) the models are created by domain experts who hand them to decision makers to implement; and (3) they fail to account for global forces on local water…	veena.srinivasan@atree.org	2017	62	3	338	345		10.1080/02626667.2016.1253844	Water Resources	Water Resources	WoS
Wesselink, A; Kooy, M; Warner, J	Socio-hydrology and hydrosocial analysis: toward dialogues across disciplines	WILEY INTERDISCIPLINARY REVIEWS-WATER		In this study, we review the ways in which water has recently been conceptualized by both natural and social scientists as either hydro-social or socio-hydrological. We do this in order to discuss whether and how they can be compatible, in order to enable dialogue across disciplines that seek to address the ecological and social challenges related to the complex human/water interactions. Through …	a.wesselink@unesco-ihe.org	2017	4	2			e1196	10.1002/wat2.1196	Environmental Sciences; Water Resources	Environmental Sciences & Ecology; Water Resources	WoS
Neumann, A; Kim, DK; Perhar, G; Arhonditsis, GB	Integrative analysis of the Lake Simcoe watershed (Ontario, Canada) as a socio-ecological system	JOURNAL OF ENVIRONMENTAL MANAGEMENT	Self-organizing maps; Lake Simcoe; Sustainability; Urbanization; Environmental policy; Integrated watershed management	Striving for long-term sustainability in catchments dominated by human activities requires development of interdisciplinary research methods to account for the interplay between environmental concerns and socio-economic pressures. In this study, we present an integrative analysis of the Lake Simcoe watershed, Ontario, Canada, as viewed from the perspective of a socio-ecological system. Key featur…	georgea@utsc.utoronto.ca	2017	188		308	321		10.1016/j.jenvman.2016.11.073	Environmental Sciences	Environmental Sciences & Ecology	WoS
Yu, DJ; Sangwan, N; Sung, K; Chen, X; Merwade, V	Incorporating institutions and collective action into a sociohydrological model of flood resilience	WATER RESOURCES RESEARCH		Stylized sociohydrological models have mainly used social memory aspects such as community awareness or sensitivity to connect hydrologic change and social response. However, social memory alone does not satisfactorily capture the details of how human behavior is translated into collective action for water resources governance. Nor is it the only social mechanism by which the two-way feedbacks of…	davidyu@purdue.edu	2017	53	2	1336	1353		10.1002/2016WR019746	Environmental Sciences; Limnology; Water Resources	Environmental Sciences & Ecology; Marine & Freshwater Biology; Water Resources	WoS
Nusser, M; Schmidt, S	Nanga Parbat Revisited: Evolution and Dynamics of Sociohydrological Interactions in the Northwestern Himalaya	ANNALS OF THE AMERICAN ASSOCIATION OF GEOGRAPHERS	glacier change; Himalaya; mountain agriculture; Nanga Parbat; sociohydrology	Regular availability of glacier and snow meltwater is essential for irrigated crop cultivation in the northwestern Himalaya. Based on a case study from the Nanga Parbat region in Gilgit-Baltistan, Pakistan, general patterns and site-specific particularities of irrigation networks in semiarid high mountain regions are conceptualized as continuously evolving sociohydrological interactions. These in…	marcus.nuesser@uni-heidelberg.de; s.schmidt@sai.uni-heidelberg.de	2017	107	2	403	415		10.1080/24694452.2016.1235495	Geography	Geography	WoS
Ishtiaque, A; Sangwan, N; Yu, DJ	Robust-yet-fragile nature of partly engineered social-ecological systems: a case study of coastal Bangladesh	ECOLOGY AND SOCIETY	coastal resilience; coastal vulnerability; cyclone; embankments; flooding; infrastructure; land subsidence; polder; robustness; robustness-fragility trade-offs; saline water intrusion; social-ecological systems; socio-hydrology; storm	Modern social-ecological systems are often partly engineered to enhance the robustness (or reduce the variance) of human welfare to environmental fluctuations over a foreseeable time horizon. Recent studies show, however, that subtle trade-offs are usually inherent in such efforts of enhancing short-term robustness. Managing variance on short time scales is likely to be associated with the buildu…		2017	22	3			5	10.5751/ES-09186-220305	Ecology; Environmental Studies	Environmental Sciences & Ecology	WoS
Westerberg, IK; Di Baldassarre, G; Beven, KJ; Coxon, G; Krueger, T	Perceptual models of uncertainty for socio-hydrological systems: a flood risk change example	HYDROLOGICAL SCIENCES JOURNAL-JOURNAL DES SCIENCES HYDROLOGIQUES	Uncertainty; socio-hydrology; perceptual model; flood risk; change analysis	Characterizing, understanding and better estimating uncertainties are key concerns for drawing robust conclusions when analyzing changing socio-hydrological systems. Here we suggest developing a perceptual model of uncertainty that is complementary to the perceptual model of the socio-hydrological system and we provide an example application to flood risk change analysis.Such a perceptual model a…	giuliano.dibaldassarre@geo.uu.se	2017	62	11	1705	1713		10.1080/02626667.2017.1356926	Water Resources	Water Resources	WoS
Sekhar M., Tomer S.K., Thiyaku S., Giriraj P., Murthy S., Mehta V.K.	Groundwater level dynamics in Bengaluru City, India	Sustainability (Switzerland)	Bengaluru; Groundwater balance; Groundwater dynamics; India; Monitoring	Groundwater accounts for half of Indian urban water use. However, little is known about its sustainability, because of inadequate monitoring and evaluation. We deployed a dense monitoring network in 154 locations in Bengaluru, India between 2015 and 2017. Groundwater levels collected at these locations were analyzed to understand the behavior of the city's groundwater system. At a local scale, gr…	Mehta, V.K.; Stockholm Environment Institute, 400 F St, United States; email: vishal.mehta@sei-us.org	2017	10	1			26	10.3390/su10010026			Scopus
Alifujiang Y., Abuduwaili J., Ma L., Samat A., Groll M.	System dynamics modeling of water level variations of lake Issyk-Kul, Kyrgyzstan	Water (Switzerland)	Arid Central Asia; Lake Issyk-Kul; Main driving factors; Scenario analysis; SD model; Sensitivity analysis; Water level simulation	Lake Issyk-Kul is an important endorheic lake in arid Central Asia. Climate change, anthropogenic water consumption and a complex basin hydrology with interlocked driving forces have led to a high variability of the water balance and an overall trend of decreasing lake water levels. The main objective of this study was to investigate these main driving forces and their interactions with the lake'…	Abuduwaili, J.; State Key Laboratory of Desert and Oasis Ecology, 818 South Beijing Road, China; email: jilil@ms.xjb.ac.cn	2017	9	12			989	10.3390/w9120989			Scopus
Schifman L.A., Herrmann D.L., Shuster W.D., Ossola A., Garmestani A., Hopton M.E.	Situating Green Infrastructure in Context: A Framework for Adaptive Socio-Hydrology in Cities	Water Resources Research	adaptive governance; coupled human-water systems; green space; stakeholder engagement; urban planning	Management of urban hydrologic processes using green infrastructure (GI) has largely focused on storm water management. Thus, design and implementation of GI usually rely on physical site characteristics and local rainfall patterns, and do not typically account for human or social dimensions. This traditional approach leads to highly centralized storm water management in a disconnected urban land…	Shuster, W.D.; National Risk Management Research Laboratory, United States; email: shuster.william@epa.gov	2017	53	12	10139	10154		10.1002/2017WR020926			Scopus
Evers M., Höllermann B., Almoradie A.D.S., Santos G.G., Taft L.	The pluralistic water research concept: A new human-water system research approach	Water (Switzerland)	Conceptual model; Human-water research; Pluralistic approach; Socio-hydrology	The use and management of water systems is influenced by a number of factors, such as economic growth, global change (e.g., urbanization, hydrological-climatic changes), politics, history and culture. Despite noteworthy efforts to develop integrative approaches to analyze water-related problems, human-water research remains a major challenge for scholars and decision makers due to the increasing …	Evers, M.; Department of Geography, Meckenheimer Allee166, Germany; email: mariele.evers@uni-bonn.de	2017	9	12			933	10.3390/w9120933			Scopus
Farjad B., Pooyandeh M., Gupta A., Motamedi M., Marceau D.	Modelling interactions between land use, climate, and hydrology along with stakeholders' negotiation for water resources management	Sustainability (Switzerland)	Climate change; Hydrological modelling; Integrated modelling system; Land-use change; River basin management; Socio-hydrology; Watershed modelling	This paper describes the main functionalities of an integrated framework to model the interactions between land use, climate, and hydrology along with stakeholders' negotiation. Its novelty lies in the combination of individual-based and spatially distributed models within the Socio-Hydrology paradigm to capture the complexity and uncertainty inherent to these systems. It encompasses a land-use/l…	Farjad, B.; Department of Geomatics Engineering, 2500 University Drive NW, Canada; email: bfarjad@ucalgary.ca	2017	9	11			2022	10.3390/su9112022			Scopus
Apurv T., Sivapalan M., Cai X.	Understanding the Role of Climate Characteristics in Drought Propagation	Water Resources Research	climate controls; drought propagation; groundwater depletion; model diagnostics; seasonality; socio-hydrology	In this study, we use numerical experiments with a simple water balance model to understand the roles of key climate characteristics in hydrologic drought propagation and the consequence of human responses to drought events under different climates. The experiments use climate inputs from a range of places with a hypothetical catchment of fixed properties to study drought propagation under differ…	Apurv, T.; Department of Civil and Environmental Engineering, United States; email: apurv2@illinois.edu	2017	53	11	9304	9329		10.1002/2017WR021445			Scopus
Ramsey E., Berglund E.Z., Goyal R.	The impact of demographic factors, beliefs, and social influences on residentialwater consumption and implications for non-price policies in urban India	Water (Switzerland)	Household survey; India; Non-price policies; Residential water consumption; Social norms; Socio-hydrology; South Asia; Water conservation; Water demand management; Water scarcity	In rapidly growing urban areas in India and the developing world, water demands typically exceed supply. While local governments may implement management programs to reduce demand for freshwater, water savings are dependent on the conservation behaviors of individuals. A household survey is presented here to examine residential water end uses and conservation behaviors in Jaipur, India. The surve…	Ramsey, E.; Sociotechnical Systems Analysis Laboratory, C.B. 7908, United States; email: evramsey@ncsu.edu	2017	9	11			844	10.3390/w9110844			Scopus
Roobavannan M., Kandasamy J., Pande S., Vigneswaran S., Sivapalan M.	Role of Sectoral Transformation in the Evolution of Water Management Norms in Agricultural Catchments: A Sociohydrologic Modeling Analysis	Water Resources Research	agriculture; changing values; economics; modeling; sectoral transformation; sociohydrology; water management	This study is focused on the water-agriculture-environment nexus as it played out in the Murrumbidgee River Basin, eastern Australia, and how coevolution of society and water management actually transpired. Over 100 years of agricultural development the Murrumbidgee Basin experienced a “pendulum swing” in terms of water allocation, initially exclusively for agriculture production changing over to…	Kandasamy, J.; School of Civil and Environmental Engineering, Australia; email: jaya.kandasamy@uts.edu.au	2017	53	10	8344	8365		10.1002/2017WR020671			Scopus
Flint C.G., Jones A.S., Horsburgh J.S.	Data Management Dimensions of Social Water Science: The iUTAH Experience	Journal of the American Water Resources Association	cyberinfrastructure; data management; data policy; data sharing; social science; socio-hydrology; urban areas; watershed management	Integrating social and hydrologic sciences for understanding water systems is challenged by data management complexities. Contemporary mandates for open science and data sharing necessitate better understanding of the implications of social science data types. In the context of an interdisciplinary water research program that endeavors to integrate and share social science and biophysical data, w…	Flint, C.G.; Department of Sociology, 0730 Old Main Hill, United States; email: courtney.flint@usu.edu	2017	53	5	988	996		10.1111/1752-1688.12568			Scopus
Bakarji J., O’Malley D., Vesselinov V.V.	Agent-Based Socio-Hydrological Hybrid Modeling for Water Resource Management	Water Resources Management	Computational social dynamics; Decision support systems; Sociohydrology	Hybrid socio-hydrological modeling has become indispensable for managing water resources in an increasingly unstable ecology caused by human activity. Most work on the subject has been focused on either qualitative socio-political recommendations with an unbounded list of vague factors or complex sociological and hydrological models with many assumptions and specialized usability. In this paper, …	Bakarji, J.; Department of Energy Resources Engineering, United States; email: jbakarji@stanford.edu	2017	31	12	3881	3898		10.1007/s11269-017-1713-7			Scopus
Ishtiaque A., Sangwan N., Yu D.J.	Robust-yet-fragile nature of partly engineered social-ecological systems: A case study of coastal Bangladesh	Ecology and Society	Coastal resilience; Coastal vulnerability; Cyclone; Embankments; Flooding; Infrastructure; Land subsidence; Polder; Robustness; Robustness-fragility trade-offs; Saline water intrusion; Social-ecological systems; Socio-hydrology; Storm	Modern social-ecological systems are often partly engineered to enhance the robustness (or reduce the variance) of human welfare to environmental fluctuations over a foreseeable time horizon. Recent studies show, however, that subtle trade-offs are usually inherent in such efforts of enhancing short-term robustness. Managing variance on short time scales is likely to be associated with the buildu…		2017	22	3			5	10.5751/ES-09186-220305			Scopus
Mekki I., Ghazouani W., Closas A., Molle F.	Perceptions of groundwater degradation and mitigation responses in the Haouaria region in Tunisia	Groundwater for Sustainable Development	Aquifer; Haouaria; Management; Overexploitation; Regulation; Tunisia	Avoiding the negative effects of intensive groundwater resource use is challenging, especially when the interactions and causal pathways between biophysical and socioeconomic processes are complex, and when users, management, and regulatory bodies are spatially dispersed. The plain of Haouaria, in north-eastern Tunisia, has witnessed an important development of groundwater abstraction, fueled by …	Mekki, I.; Institut National de Recherches en Génie Rural, B.P. 10, Rue Hedi Karray, Tunisia; email: insaf.mekki@laposte.net	2017	5		101	110		10.1016/j.gsd.2017.05.001			Scopus
Mekki I., Ghazouani W., Closas A., Molle F.	Perceptual models of uncertainty for socio-hydrological systems: a flood risk change example	Hydrological Sciences Journal	change analysis; flood risk; perceptual model; socio-hydrology; Uncertainty	Characterizing, understanding and better estimating uncertainties are key concerns for drawing robust conclusions when analyzing changing socio-hydrological systems. Here we suggest developing a perceptual model of uncertainty that is complementary to the perceptual model of the socio-hydrological system and we provide an example application to flood risk change analysis. Such a perceptual model …	Di Baldassarre, G.; Centre for Natural Disaster Science, Sweden; email: giuliano.dibaldassarre@geo.uu.se	2017	62	11	1705	1713		10.1080/02626667.2017.1356926			Scopus
Sanderson M.R., Bergtold J.S., Heier Stamm J.L., Caldas M.M., Ramsey S.M.	Bringing the “social” into sociohydrology: Conservation policy support in the Central Great Plains of Kansas, USA	Water Resources Research	conservation; culture; policy; sociohydrology; values	Identifying means of empirically modeling the human component of a coupled, human-water system becomes critically important to further advances in sociohydrology. We develop a social-psychological model of environmental decision making that addresses four key challenges of incorporating social science into integrated models. We use the model to explain preferences for three conservation policies …	Sanderson, M.R.; Department of Sociology, United States; email: mattrs@ksu.edu	2017	53	8	6725	6743		10.1002/2017WR020659			Scopus
Han S., Tian F., Liu Y., Duan X.	Socio-hydrological perspectives of the co-evolution of humans and groundwater in Cangzhou, North China Plain	Hydrology and Earth System Sciences		This paper presents a historical analysis from socio-hydrological perspectives of the coupled human-groundwater system of the Cangzhou region in the North China Plain (NCP). The history of the <q>pendulum swing</q> for water allocation between the economic development and aquifer environmental health of the system is divided into five eras (i.e., natural, exploitation, degradation and restoration…	Han, S.; State Key Laboratory of Simulation and Regulation of Water Cycle in River Basin, China; email: hansj@iwhr.com	2017	21	7	3619	3633		10.5194/hess-21-3619-2017			Scopus
Seidl R., Barthel R.	Linking scientific disciplines: Hydrology and social sciences	Journal of Hydrology	Hydrology; Interdisciplinarity; Review; Social sciences; Socio-hydrology; Survey	The integration of interdisciplinary scientific and societal knowledge plays an increasing role in sustainability science and more generally, in global change research. In the field of water resources, interdisciplinarity has long been recognized as crucial. Recently, new concepts and ideas about how to approach water resources management more holistically have been discussed. The emergence of co…	Seidl, R.; USYS Transdisciplinarity Lab, Switzerland; email: roman.seidl@usys.ethz.ch	2017	550		441	452		10.1016/j.jhydrol.2017.05.008			Scopus
Srinivasan V., Konar M., Sivapalan M.	A dynamic framework for water security	Water Security	Dynamic framework; Human-water systems; IWRM; Regime shifts; Socio-hydrology; Sustainable development goals; Water security	Water security is a multi-faceted problem, going beyond mere balancing of supply and demand. Early attempts to quantify water security relied on static index based approaches that failed to acknowledge that human action is intrinsic to the water cycle. Human adaptation to environmental change and increasing spatial specialization in the modern world necessitate a more flexible and dynamic view of…	Srinivasan, V.; Centre for Environment and Development, India; email: veena.srinivasan@gmail.com	2017	1		12	20		10.1016/j.wasec.2017.03.001			Scopus
Fuchs S., Karagiorgos K., Kitikidou K., Maris F., Paparrizos S., Thaler T.	Flood risk perception and adaptation capacity: A contribution to the socio-hydrology debate	Hydrology and Earth System Sciences		Dealing with flood hazard and risk requires approaches rooted in both natural and social sciences, which provided the nexus for the ongoing debate on socio-hydrology. Various combinations of non-structural and structural flood risk reduction options are available to communities. Focusing on flood risk and the information associated with it, developing risk management plans is required but often o…	Fuchs, S.; Institute of Mountain Risk Engineering, Austria; email: sven.fuchs@boku.ac.at	2017	21	6	3183	3198		10.5194/hess-21-3183-2017			Scopus
Roobavannan M., Kandasamy J., Pande S., Vigneswaran S., Sivapalan M.	Allocating Environmental Water and Impact on Basin Unemployment: Role of A Diversified Economy	Ecological Economics	Agriculture; Diversified economy; Environmental water allocation; Migration; Socio-hydrology; Unemployment	Water diversion for environmental purposes threatens many agricultural communities. This paper focuses on the water-agriculture-environment nexus in the Murrumbidgee River Basin, Australia, and attempts to explain how reduced water allocation to agriculture aimed at protecting the environment in turn impacted the wider economy and the community. Predictably reduced water allocation saw declines i…	Kandasamy, J.; School of Civil and Environmental Engineering, PO BOX 123, Broadway NSW 2007, Australia; email: jaya.kandasamy@uts.edu.au	2017	136		178	188		10.1016/j.ecolecon.2017.02.006			Scopus
Ciullo A., Viglione A., Castellarin A., Crisci M., Di Baldassarre G.	Socio-hydrological modelling of flood-risk dynamics: comparing the resilience of green and technological systems	Hydrological Sciences Journal	city of Rome; flood risk; People’s Republic of Bangladesh; resilience; socio-hydrology	This work aims to provide a dynamic assessment of flood risk and community resilience by explicitly accounting for variable human behaviour, e.g. risk-taking and awareness-raising attitudes. We consider two different types of socio-hydrological systems: green systems, whereby societies deal with risk only via non-structural measures, and technological systems, whereby risk is dealt with also by s…	Ciullo, A.; Department of Flood Risk Management, Netherlands; email: alessio.ciullo@deltares.nl	2017	62	6	880	891		10.1080/02626667.2016.1273527			Scopus
McCurley K.L., Jawitz J.W.	Hyphenated hydrology: Interdisciplinary evolution of water resource science	Water Resources Research	humanistic; hydrology; interdisciplinary; network; publications	Hydrology has advanced considerably as a scientific discipline since its recognized inception in the mid-twentieth century. Modern water resource related questions have forced adaptation from exclusively physical or engineering science viewpoints toward a deliberate interdisciplinary context. Over the past few decades, many of the eventual manifestations of this evolution were foreseen by promine…	Jawitz, J.W.; Soil and Water Sciences Department, United States; email: jawitz@ufl.edu	2017	53	4	2972	2982		10.1002/2016WR019835			Scopus
Nüsser M., Schmidt S.	Nanga Parbat Revisited: Evolution and Dynamics of Sociohydrological Interactions in the Northwestern Himalaya	Annals of the American Association of Geographers	glacier change; Himalaya; mountain agriculture; Nanga Parbat; sociohydrology	Regular availability of glacier and snow meltwater is essential for irrigated crop cultivation in the northwestern Himalaya. Based on a case study from the Nanga Parbat region in Gilgit-Baltistan, Pakistan, general patterns and site-specific particularities of irrigation networks in semiarid high mountain regions are conceptualized as continuously evolving sociohydrological interactions. These in…		2017	107	2	403	415		10.1080/24694452.2016.1235495			Scopus
Neumann A., Kim D.-K., Perhar G., Arhonditsis G.B.	Integrative analysis of the Lake Simcoe watershed (Ontario, Canada) as a socio-ecological system	Journal of Environmental Management	Environmental policy; Integrated watershed management; Lake Simcoe; Self-organizing maps; Sustainability; Urbanization	Striving for long-term sustainability in catchments dominated by human activities requires development of interdisciplinary research methods to account for the interplay between environmental concerns and socio-economic pressures. In this study, we present an integrative analysis of the Lake Simcoe watershed, Ontario, Canada, as viewed from the perspective of a socio-ecological system. Key featur…	Arhonditsis, G.B.; Ecological Modelling Laboratory, 1065 Military Trail, Canada; email: georgea@utsc.utoronto.ca	2017	188		308	321		10.1016/j.jenvman.2016.11.073			Scopus
Srinivasan V., Sanderson M., Garcia M., Konar M., Blöschl G., Sivapalan M.	Prediction in a socio-hydrological world	Hydrological Sciences Journal	modelling; prediction; safe operating; socio-hydrology; trajectories; water resources	Water resource management involves public investments with long-ranging impacts that traditional prediction approaches cannot address. These are increasingly being critiqued because (1) there is an absence of feedbacks between water and society; (2) the models are created by domain experts who hand them to decision makers to implement; and (3) they fail to account for global forces on local water…	Srinivasan, V.; Centre for Environment and Development, India; email: veena.srinivasan@atree.org	2017	62	3	338	345		10.1080/02626667.2016.1253844			Scopus
Di Baldassarre G., Saccà S., Aronica G.T., Grimaldi S., Ciullo A., Crisci M.	Human-flood interactions in Rome over the past 150 years	Advances in Geosciences		Throughout history, the socio-economic development of the city of Rome has been intertwined with the magnitude and frequency of flooding events from the Tiber, one of Italy's largest rivers. Ancient Rome mostly developed on the hills, while the Tiber's floodplain was mainly exploited for agricultural purposes. A few small communities did settle in the riparian areas of the Tiber, but they had a r…	Di Baldassarre, G.; Uppsala University, Sweden; email: giuliano.dibaldassarre@geo.uu.se	2017	44		9	13		10.5194/adgeo-44-9-2017			Scopus
Yu D.J., Sangwan N., Sung K., Chen X., Merwade V.	Incorporating institutions and collective action into a sociohydrological model of flood resilience	Water Resources Research	collective action; community resilience; flood resilience; institutions; social memory; sociohydrology	Stylized sociohydrological models have mainly used social memory aspects such as community awareness or sensitivity to connect hydrologic change and social response. However, social memory alone does not satisfactorily capture the details of how human behavior is translated into collective action for water resources governance. Nor is it the only social mechanism by which the two-way feedbacks of…	Yu, D.J.; Lyles School of Civil Engineering, United States; email: davidyu@purdue.edu	2017	53	2	1336	1353		10.1002/2016WR019746			Scopus
Gober P., White D.D., Quay R., Sampson D.A., Kirkwood C.W.	Socio-hydrology modelling for an uncertain future, with examples from the USA and Canada	Geological Society Special Publication		Socio-hydrology brings an interest in human values, markets, social organizations and public policy to the traditional emphasis of water science on climate, hydrology, toxicology and ecology. It also conveys a decision focus in the form of decision support tools, stakeholder engagement and new knowledge about the science-policy interface. This paper demonstrates how policy decisions and human beh…	Gober, P.; School of Geographical Sciences and Urban Planning, United States; email: gober@asu.edu	2017	408	1	183	199		10.1144/SP408.2			Scopus
Lerner, AM; Eakin, HC; Tellman, E; Bausch, JC; Aguilara, BH	Governing the gaps in water governance and land-use planning in a megacity: The example of hydrological risk in Mexico City	CITIES	Urban water governance; Informality; Hydrological risk; Mexico City	Megacities are socio-ecological systems (SES) that encompass complex interactions between residents, institutions, and natural resource management. These interactions are exacerbated by climate change as resources such as water become scarce or hazardous through drought and flooding. In order to develop pathways for improved sustainability, the disparate factors that create vulnerable conditions …	amy.lerner@iecologia.unam.mx	2018	83		61	70		10.1016/j.cities.2018.06.009	Urban Studies	Urban Studies	WoS
Lei, XW; Zhao, JS; Wang, DB; Sivapalan, M	A Budyko-type model for human water consumption	JOURNAL OF HYDROLOGY	Socio-hydrology; Budyko equation; Human water consumption; Optimality; Water management	Budyko-type models in hydrology are simple but efficient descriptions of the vegetation-mediated hydrologic cycle in catchments. Based on hypothesized similarities between vegetation and human water consumption interactions in terms of water demand, constraints, and system functioning as well as catchment processes and outcomes, a corresponding Budyko-type framework is proposed here for human wat…	zhaojianshi@tsinghua.edu.cn	2018	567		212	226		10.1016/j.jhydrol.2018.10.021	Engineering, Civil; Geosciences, Multidisciplinary; Water Resources	Engineering; Geology; Water Resources	WoS
Callegary, JB; Megdal, SB; Villasenor, EMT; Petersen-Perlman, JD; Sosa, IM; Monreal, R; Gray, F; Norieg, FG	Findings and lessons learned from the assessment of the Mexico-United States transboundary San Pedro and Santa Cruz aquifers: The utility of social science in applied hydrologic research	JOURNAL OF HYDROLOGY-REGIONAL STUDIES	Transboundary aquifers; US-Mexico; Groundwater; Socio-hydrology; Hydrogeology	Study Region: This study region encompasses the Transboundary San Pedro and Santa Cruz aquifers which are shared between the states of Sonora (Mexico) and Arizona (US). Special regional considerations include a semi-arid climate, basin-fill aquifers with predominantly montane recharge areas, economic drivers in the mining, trade, and military sectors, ground-water-dependent cities with expanding …	jcallega@usgs.gov; smegdal@email.arizona.edu; emtapia@email.arizona.edu; jacobpp@email.arizona.edu; mael@correo.geologia.uson.mx; monreal@ciencias.uson.mx; fgray@usgs.gov; grijalva@correo.geologia.uson.mx	2018	20		60	73		10.1016/j.ejrh.2018.08.002	Water Resources	Water Resources	WoS
Shelton, RE; Baeza, A; Janssen, MA; Eakin, H	Managing household socio-hydrological risk in Mexico city: A game to communicate and validate computational modeling with stakeholders	JOURNAL OF ENVIRONMENTAL MANAGEMENT	Water resources management; Mexico; Multi-stakeholder modeling; Role-play games; Model validation	Residents of Mexico City experience major hydrological risks, including flooding events and insufficient potable water access for many households. A participatory modeling project, MEGADAPT, examines hydrological risk as co-constructed by both biophysical and social factors and aims to explore alternative scenarios of governance. Within the model, neighborhoods are represented as agents that take…	Rebecca.Shelton@asu.edu; abaezaca@asu.edu; Marco.Janssen@asu.edu; Hallie.Eakin@asu.edu	2018	227		200	208		10.1016/j.jenvman.2018.08.094	Environmental Sciences	Environmental Sciences & Ecology	WoS
Al-Amin, S; Berglund, EZ; Mahinthakumar, G; Larson, KL	Assessing the effects of water restrictions on socio-hydrologic resilience for shared groundwater systems	JOURNAL OF HYDROLOGY	Agent-based model; Complex adaptive system; Groundwater management; Demand management; Water shortage; Sustainability index	Groundwater resources are shared across management boundaries. Multiple management units that differ in scale, constraints and objectives may manage a shared resource in a decentralized approach. The interactions among water managers, water users, and the water resource components influence the performance of management strategies and the resilience of community-level water supply and groundwater…	salamin@ncsu.edu	2018	566		872	885		10.1016/j.jhydrol.2018.08.045	Engineering, Civil; Geosciences, Multidisciplinary; Water Resources	Engineering; Geology; Water Resources	WoS
Garcia, M; Islam, S	The role of external and emergent drivers of water use change in Las Vegas	URBAN WATER JOURNAL	Water use; demand modeling; socio-hydrology	Over the past twenty-five years, per capita water use has declined in many US cities. Technological and policy changes partially explain this decline, but variables beyond the control of water managers also influence water use including external (e.g. drought) and emergent (e.g. public attention) changes. Importantly, these variables interact and the relationships between these variables and wate…	M.Garcia@asu.edu	2018	15	9	888	898		10.1080/1573062X.2019.1581232	Water Resources	Water Resources	WoS
Ferdous, MR; Wesselink, A; Brandimarte, L; Slager, K; Zwarteveen, M; Di Baldassarre, G	Socio-hydrological spaces in the Jamuna River floodplain in Bangladesh	HYDROLOGY AND EARTH SYSTEM SCIENCES		Socio-hydrology aims to understand the dynamics and co-evolution of coupled human-water systems, with research consisting of generic models as well as specific case studies. In this paper, we propose a concept to help bridge the gap between these two types of socio-hydrological studies: socio-hydrological spaces (SHSs). A socio-hydrological space is a geographical area in a landscape. Its particu…	r.ferdous@un-ihe.org	2018	22	10	5159	5173		10.5194/hess-22-5159-2018	Geosciences, Multidisciplinary; Water Resources	Geology; Water Resources	WoS
Pan, HZ; Deal, B; Destouni, G; Zhang, YL; Kalantari, Z	Sociohydrology modeling for complex urban environments in support of integrated land and water resource management practices	LAND DEGRADATION & DEVELOPMENT	hydrological modeling; integrated water resource management; land use modeling; regional economy; stormwater management	This paper argues that a systems' thinking and explicit modeling approach is needed to address noted weaknesses (in terms of practicality and usefulness) in integrated water resource management. A process of coupling complex regional land use, economy, and water system interactions in integrated modeling is demonstrated with proof-of-concept applications to two urban cases (Chicago and Stockholm)…	zahra.kalantari@natgeo.su.se	2018	29	10	3639	3652		10.1002/ldr.3106	Environmental Sciences; Soil Science	Environmental Sciences & Ecology; Agriculture	WoS
Horn, F; Elagib, NA	Building socio-hydrological resilient cities against flash floods: Key challenges and a practical plan for arid regions	JOURNAL OF HYDROLOGY	Urban flash flood; Integrated flash flood management; Management challenges; Socio-hydrology; Resilience; Sudan	The objective of this research is to improve the understanding and recognition of the management challenges to flash flooding hazards and the potential adaptive measures within the arid urban areas through a socio-hydrological framework. Considering the capital of Sudan, Khartoum, as an example of urban arid areas with increasing flash flood risk, the analysis was founded on expert views and opin…	nadir.elagib@th-koeln.de	2018	564		125	132		10.1016/j.jhydrol.2018.07.001	Engineering, Civil; Geosciences, Multidisciplinary; Water Resources	Engineering; Geology; Water Resources	WoS
Conrad, SA; Yates, D	Coupling stated preferences with a hydrological water resource model to inform water policies for residential areas in the Okanagan Basin, Canada	JOURNAL OF HYDROLOGY	Coupled socio-hydrological model; Socio-ecological systems; Water resource models; Consumer stated preferences; Water supply and demand; Water policymaking	To improve the behavioural realism of a water resource model, this study coupled hydrologic modelling with stated preference research, thereby incorporating an empirical estimate of behavioural parameters to represent residents' landscape decisions in an urban environment. The stated preference data came from a discrete choice experiment in which residents were asked to choose among several possi…	steve.conrad@sfu.ca	2018	564		846	858		10.1016/j.jhydrol.2018.07.031	Engineering, Civil; Geosciences, Multidisciplinary; Water Resources	Engineering; Geology; Water Resources	WoS
Essenfelder, AH; Perez-Blanco, CD; Mayer, AS	Rationalizing Systems Analysis for the Evaluation of Adaptation Strategies in Complex Human-Water Systems	EARTHS FUTURE	human-water systems; socio-hydrology; hydro-economic model; systems analysis; human behavior; adaptation strategies	Water resources management is a nontrivial process requiring a holistic understanding of the factors driving the dynamics of human-water systems. Policy-induced or autonomous behavioral changes in human systems may affect water and land management, which may affect water systems and feedback to human systems, further impacting water and land management. Currently, hydro-economic models lack the a…	arthur.essenfelder@unive.it	2018	6	9	1181	1206		10.1029/2018EF000826	Environmental Sciences; Geosciences, Multidisciplinary; Meteorology & Atmospheric Sciences	Environmental Sciences & Ecology; Geology; Meteorology & Atmospheric Sciences	WoS
Nakamura, S; Oki, T	Paradigm Shifts on Flood Risk Management in Japan: Detecting Triggers of Design Flood Revisions in the Modern Era	WATER RESOURCES RESEARCH	flood risk management; paradigm shift; design flood; sociohydrology; Japan	Flood risk management (FRM) has repeatedly evolved through paradigm shifts in human history. In modern FRM, a design flood, which reflects the protection standard or safety level of the FRM, is one of the most important elements. It has been historically revised and increased to reflect the sociohydrological situation of each era. Through this study we aimed to identify these changes to FRM and t…	shinichiro@civil.nagoya-u.ac.jp	2018	54	8	5504	5515		10.1029/2017WR022509	Environmental Sciences; Limnology; Water Resources	Environmental Sciences & Ecology; Marine & Freshwater Biology; Water Resources	WoS
Horton, AJ; Lazarus, ED; Hales, TC; Constantine, JA; Bruford, MW; Goossens, B	Can Riparian Forest Buffers Increase Yields From Oil Palm Plantations?	EARTHS FUTURE	forest conservation; ecosystem services; socio-hydrology; social-ecological systems; coupled human-landscape systems; Borneo	Forests on tropical floodplains across Southeast Asia are being converted to oil palm plantations. Preserving natural riparian forest corridors along rivers that pass through oil palm plantations has clear benefits for ecological conservation, but these corridors (also called buffers) use land that is potentially economically valuable for agriculture. Here we examine how riparian forest buffers r…	hortonaj1@cardiff.ac.uk; e.d.lazarus@soton.ac.uk	2018	6	8	1082	1096		10.1029/2018EF000874	Environmental Sciences; Geosciences, Multidisciplinary; Meteorology & Atmospheric Sciences	Environmental Sciences & Ecology; Geology; Meteorology & Atmospheric Sciences	WoS
Xu, L; Gober, P; Wheater, HS; Kajikawa, Y	Reframing socio-hydrological research to include a social science perspective	JOURNAL OF HYDROLOGY	Human-water interaction; System dynamics; Bibliographic metrics; Network analysis; Interdisciplinary	There is increasing recognition of the need to incorporate the complex and dynamic interactions between society and water in studies of water resource systems. The study of human-water dynamics requires the involvement of researchers from different disciplines, including hydrology and social science. This paper tracks recent trends in socio-hydrological research using quantitative and qualitative…	li.xu@usask.ca	2018	563		76	83		10.1016/j.jhydrol.2018.05.061	Engineering, Civil; Geosciences, Multidisciplinary; Water Resources	Engineering; Geology; Water Resources	WoS
Jaramillo, LV; Stone, MC; Morrison, RR	An indicator-based approach to assessing resilience of socio-hydrologic systems in Nepal to hydropower development	JOURNAL OF HYDROLOGY		Resilience is essential to the integrity of socio-hydrologic systems, especially when faced with stress caused by natural hazards and economic development. Nepal has seen both in recent years. The objective of this study is to construct and implement an indicator-based approach to assess socio-hydrological systems with new metrics to evaluate the influence of hydropower development. We adopted a …	lvjaramillo@alumni.stanford.edu	2018	563		1111	1118		10.1016/j.jhydrol.2018.05.070	Engineering, Civil; Geosciences, Multidisciplinary; Water Resources	Engineering; Geology; Water Resources	WoS
Hund, SV; Allen, DM; Morillas, L; Johnson, MS	Groundwater recharge indicator as tool for decision makers to increase socio-hydrological resilience to seasonal drought	JOURNAL OF HYDROLOGY	Groundwater recharge; Socio-hydrology; Resilience; Drought; Wet-dry tropics; Adaptation	Communities in regions with seasonal rainfall face annual dry seasons, during which water shortages and conflicts between different water use sectors may erupt. These difficulties increase following wet seasons with low rainfall, such as in relation to El Nino events in the wet-dry tropics of Central America. Hydrologic data are typically scarce in this region, making the development of drought a…	shund@eoas.ubc.ca	2018	563		1119	1134		10.1016/j.jhydrol.2018.05.069	Engineering, Civil; Geosciences, Multidisciplinary; Water Resources	Engineering; Geology; Water Resources	WoS
Keys, PW; Wang-Erlandsson, L	On the social dynamics of moisture recycling	EARTH SYSTEM DYNAMICS		The biophysical phenomenon of terrestrial moisture recycling connects distant regions via the atmospheric branch of the water cycle. This process, whereby the land surface mediates evaporation to the atmosphere and the precipitation that falls downwind, is increasingly well-understood. However, recent studies highlight a need to consider an important and often missing dimension - the social. Here…	patrick.keys@colostate.edu	2018	9	2	829	847		10.5194/esd-9-829-2018	Geosciences, Multidisciplinary	Geology	WoS
Wiegleb, V; Bruns, A	Hydro-social arrangements and paradigmatic change in water governance: an analysis of the sustainable development goals (SDGs)	SUSTAINABILITY SCIENCE	SDGs; Water governance; Policy and paradigm change; Hydro-social cycle	SDG 6 presents a global water agenda and an important opportunity to steer development trajectories towards a water-secure world. Based on semi-structured interviews and a political ecology perspective, this study takes water and SDG 6 as a focal point to analyze the shift from MDGs to SDGs in terms of underlying governance paradigms and policy change dynamics. Results indicate that the water-rel…	wiegleb@uni-trier.de	2018	13	4	1155	1166		10.1007/s11625-017-0518-1	Green & Sustainable Science & Technology; Environmental Sciences	Science & Technology - Other Topics; Environmental Sciences & Ecology	WoS
O'Keeffe, J; Moulds, S; Bergin, E; Brozovic, N; Mijic, A; Buytaert, W	Including Farmer Irrigation Behavior in a Sociohydrological Modeling Framework With Application in North India	WATER RESOURCES RESEARCH	behavior; irrigation; India; water security; sociohydrology; modeling	Understanding water user behavior and its potential outcomes is important for the development of suitable water resource management options. Computational models are commonly used to assist water resource management decision making; however, while natural processes are increasingly well modeled, the inclusion of human behavior has lagged behind. Improved representation of irrigation water user be…	jimmy.okeeffe@imperial.ac.uk	2018	54	7	4849	4866		10.1029/2018WR023038	Environmental Sciences; Limnology; Water Resources	Environmental Sciences & Ecology; Marine & Freshwater Biology; Water Resources	WoS
Baeza, A; Estrada-Baron, A; Serrano-Candela, F; Bojorquez, LA; Eakin, H; Escalante, AE	Biophysical, infrastructural and social heterogeneities explain spatial distribution of waterborne gastrointestinal disease burden in Mexico City	ENVIRONMENTAL RESEARCH LETTERS	flooding; giardiasis; neighborhood effect; spatial statistics; water management; Mexico City	Due to unplanned growth, large extension and limited resources, most megacities in the developing world are vulnerable to hydrological hazards and infectious diseases caused by waterborne pathogens. Here we aim to elucidate the extent of the relation between the spatial heterogeneity of physical and socio-economic factors associated with hydrological hazards (flooding and scarcity) and the spatia…	aescalante@iecologia.unam.mx	2018	13	6			64016	10.1088/1748-9326/aac17c	Environmental Sciences; Meteorology & Atmospheric Sciences	Environmental Sciences & Ecology; Meteorology & Atmospheric Sciences	WoS
Sapountzaki, K; Daskalakis, I	Expansionary Adaptive Transformations of Socio-Hydrological Systems (SHSs): The Case of Drought in Messara Plain, Crete, Greece	ENVIRONMENTAL MANAGEMENT	Resilience; Adaptation limit; SES; Social-hydrological systems; Sustainability; Drought	The paper attempts to document the ontology of socio-hydrological systems (SHSs), propose approaches of delimitation of SHSs' (territorial) boundaries, and investigate operational aspects of their adaptation to drought including repercussions on sustainability. To this end, a series of hypotheses are tested: (a) SHSs contain social subsystems with different expectations regarding water resources,…	i.daskalakis@gmail.com	2018	61	5	819	833		10.1007/s00267-018-1012-y	Environmental Sciences	Environmental Sciences & Ecology	WoS
Sung, K; Jeong, H; Sangwan, N; Yu, DJ	Effects of Flood Control Strategies on Flood Resilience Under Sociohydrological Disturbances	WATER RESOURCES RESEARCH	human-water interaction; flood control; community resilience; adaptive capacity; sociohydrologic modeling	A community capacity to cope with flood hazards, or community flood resilience, emerges from the interplay of hydrological and social processes. This interplay can be significantly influenced by the flood control strategy adopted by a society, i.e., how a society sets its desired flood protection level and strives to achieve this goal. And this interplay can be further complicated by rising land-…	davidyu@purdue.edu	2018	54	4	2661	2680		10.1002/2017WR021440	Environmental Sciences; Limnology; Water Resources	Environmental Sciences & Ecology; Marine & Freshwater Biology; Water Resources	WoS
Breyer, B; Zipper, SC; Qiu, JX	Sociohydrological Impacts of Water Conservation Under Anthropogenic Drought in Austin, TX (USA)	WATER RESOURCES RESEARCH	sociohydrology; anthropogenic drought; urban climate change adaptation; water conservation; cross-scale interactions	Municipal water providers increasingly respond to drought by implementing outdoor water use restrictions to reduce urban water withdrawals and maintain water availability. However, restricting urban outdoor water use to support watershed-scale drought resilience may generate unanticipated cross-scale interactions, for example, by altering drought response and recovery in urban vegetation or urban…	breyer3@illinois.edu	2018	54	4	3062	3080		10.1002/2017WR021155	Environmental Sciences; Limnology; Water Resources	Environmental Sciences & Ecology; Marine & Freshwater Biology; Water Resources	WoS
Kuil, L; Evans, T; McCord, PF; Salinas, JL; Bloeschl, G	Exploring the Influence of Smallholders' Perceptions Regarding Water Availability on Crop Choice and Water Allocation Through Socio-Hydrological Modeling	WATER RESOURCES RESEARCH	smallholder; water scarcity; adaption; modeling; socio-hydrology; agriculture	While it is known that farmers adopt different decision-making behaviors to cope with stresses, it remains challenging to capture this diversity in formal model frameworks that are used to advance theory and inform policy. Guided by cognitive theory and the theory of bounded rationality, this research develops a novel, socio-hydrological model framework that can explore how a farmer's perception …	kuil@waterresources.at	2018	54	4	2580	2604		10.1002/2017WR021420	Environmental Sciences; Limnology; Water Resources	Environmental Sciences & Ecology; Marine & Freshwater Biology; Water Resources	WoS
Gunda, T; Turner, BL; Tidwell, VC	The Influential Role of Sociocultural Feedbacks on Community-Managed Irrigation System Behaviors During Times of Water Stress	WATER RESOURCES RESEARCH		Sociohydrological studies use interdisciplinary approaches to explore the complex interactions between physical and social water systems and increase our understanding of emergent and paradoxical system behaviors. The dynamics of community values and social cohesion, however, have received little attention in modeling studies due to quantification challenges. Social structures associated with com…	tgunda@sandia.gov	2018	54	4	2697	2714		10.1002/2017WR021223	Environmental Sciences; Limnology; Water Resources	Environmental Sciences & Ecology; Marine & Freshwater Biology; Water Resources	WoS
Leong, C	The Role of Narratives in Sociohydrological Models of Flood Behaviors	WATER RESOURCES RESEARCH	resilience; sociohydrology; narratives; flood behavior; system dynamics; embankments	While current efforts to model sociohydrologic phenomena provide crucial insight, critics argue that these do not fully reflect the complexity one observes empirically in the real world. The policy sciences, with its focus on the interaction between human agency and the institutions that constrain public choice, can complement such efforts by providing a narrative approach. This paper demonstrate…	ching@nus.edu.sg	2018	54	4	3100	3121		10.1002/2017WR022036	Environmental Sciences; Limnology; Water Resources	Environmental Sciences & Ecology; Marine & Freshwater Biology; Water Resources	WoS
Mason, E; Giuliani, M; Castelletti, A; Amigoni, F	Identifying and Modeling Dynamic Preference Evolution in Multipurpose Water Resources Systems	WATER RESOURCES RESEARCH	water management; negotiation protocol; tradeoff analysis; multipurpose reservoir; coupled human-natural systems; sociohydrology	Multipurpose water systems are usually operated on a tradeoff of conflicting operating objectives. Under steady state climatic and socioeconomic conditions, such tradeoff is supposed to represent a fair and/or efficient preference. Extreme variability in external forcing might affect water operators' risk aversion and force a change in her/his preference. Properly accounting for these shifts is k…	andrea.castelletti@polimi.it	2018	54	4	3162	3175		10.1002/2017WR021431	Environmental Sciences; Limnology; Water Resources	Environmental Sciences & Ecology; Marine & Freshwater Biology; Water Resources	WoS
Wurl, J; Gamez, AE; Ivanova, A; Lamadrid, MAI; Hernandez-Morales, P	Socio-hydrological resilience of an arid aquifer system, subject to changing climate and inadequate agricultural management: A case study from the Valley of Santo Domingo, Mexico	JOURNAL OF HYDROLOGY	Water security; Socio-hydrological system; Overexploitation; Arid ecosystem; MODFLOW	Mismanagement has caused the overexploitation of one third of the major aquifers in Mexico, mainly due to excessive water extraction for agricultural irrigation. Santo Domingo (Baja California Sur, in northern Mexico, where agriculture absorbs nearly 80% of water) is the only aquifer in the Mexico where, after a period of overexploitation, equality between extraction and recharge rates was achiev…	jwurl@uabcs.mx	2018	559		486	498		10.1016/j.jhydrol.2018.02.050	Engineering, Civil; Geosciences, Multidisciplinary; Water Resources	Engineering; Geology; Water Resources	WoS
Magdaleno, F	Flows, ecology and people: is there room for cultural demands in the assessment of environmental flows?	WATER SCIENCE AND TECHNOLOGY	ecohydrology; environmental demands; instream flows; socio-hydrology; water requirements	The science and practice of environmental flows - aimed at the protection of ecosystem values and functions in regulated rivers - has progressively recognized the relevance of incorporating socio-cultural demands of local communities in the calculation of water requirements of rivers' habitats and services. This review paper synthesizes the concept of cultural flows, and presents the main approac…	fernando.magdaleno@cedex.es	2018	77	7	1777	1781		10.2166/wst.2018.075	Engineering, Environmental; Environmental Sciences; Water Resources	Engineering; Environmental Sciences & Ecology; Water Resources	WoS
Di Baldassarre, G; Nohrstedt, D; Mard, J; Burchardt, S; Albin, C; Bondesson, S; Breinl, K; Deegan, FM; Fuentes, D; Lopez, MG; Granberg, M; Nyberg, L; Nyman, MR; Rhodes, E; Troll, V; Young, S; Walch, C; Parker, CF	An Integrative Research Framework to Unravel the Interplay of Natural Hazards and Vulnerabilities	EARTHS FUTURE	Disaster risk reduction; Natural hazards; Vulnerability; Flood risk; Socio-hydrology	Climate change, globalization, urbanization, social isolation, and increased interconnectedness between physical, human, and technological systems pose major challenges to disaster risk reduction (DRR). Subsequently, economic losses caused by natural hazards are increasing in many regions of the world, despite scientific progress, persistent policy action, and international cooperation. We argue …	giuliano.dibaldassarre@geo.uu.se	2018	6	3	305	310		10.1002/2017EF000764	Environmental Sciences; Geosciences, Multidisciplinary; Meteorology & Atmospheric Sciences	Environmental Sciences & Ecology; Geology; Meteorology & Atmospheric Sciences	WoS
Hynds, P; Naughton, O; O'Neill, E; Mooney, S	Efficacy of a national hydrological risk communication strategy: Domestic wastewater treatment systems in the Republic of Ireland	JOURNAL OF HYDROLOGY	Wastewater treatment; Regulation; Policy; Engagement; Socio-hydrology; Risk communication	A significant body of research has focused on the role of domestic wastewater treatment systems (DWWTSs) as sources of human-specific aquatic contaminants in both developed and developing regions. However, to date few studies have sought to investigate the awareness, attitudes and behaviours of DWWTS owners and the efficacy of associated communication initiatives. The current study provides an ex…	hyndsp@tcd.ie	2018	558		205	213		10.1016/j.jhydrol.2018.01.041	Engineering, Civil; Geosciences, Multidisciplinary; Water Resources	Engineering; Geology; Water Resources	WoS
Roobavannan, M; van Emmerik, THM; Elshafei, Y; Kandasamy, J; Sanderson, MR; Vigneswaran, S; Pande, S; Sivapalan, M	Norms and values in sociohydrological models	HYDROLOGY AND EARTH SYSTEM SCIENCES		Sustainable water resources management relies on understanding how societies and water systems coevolve. Many place-based sociohydrology (SH) modeling studies use proxies, such as environmental degradation, to capture key elements of the social component of system dynamics. Parameters of assumed relationships between environmental degradation and the human response to it are usually obtained thro…	jaya.kandasamy@uts.edu.au	2018	22	2	1337	1349		10.5194/hess-22-1337-2018	Geosciences, Multidisciplinary; Water Resources	Geology; Water Resources	WoS
Haeffner, M; Jackson-Smith, D; Flint, CG	Social Position Influencing the Water Perception Gap Between Local Leaders and Constituents in a Socio-Hydrological System	WATER RESOURCES RESEARCH		How well city leaders represent their constituents and meet their needs are key concerns in transitioning to local sustainable water governance. To date, however, there is little research documenting the influence of social position between elected leaders who make policy, career staff water managers who design and operate systems and implement policies, and the members of the public whose indivi…	melissahaeffner@pdx.edu	2018	54	2	663	679		10.1002/2017WR021456	Environmental Sciences; Limnology; Water Resources	Environmental Sciences & Ecology; Marine & Freshwater Biology; Water Resources	WoS
Mostert, E	An alternative approach for socio-hydrology: case study research	HYDROLOGY AND EARTH SYSTEM SCIENCES		Currently the most popular approach in socio hydrology is to develop coupled human-water models. This article proposes an alternative approach, qualitative case study research, involving a systematic review of (1) the human activities affecting the hydrology in the case, (2) the main human actors, and (3) the main factors influencing the actors and their activities. Moreover, this article present…	e.mostert@tudelft.nl	2018	22	1	317	329		10.5194/hess-22-317-2018	Geosciences, Multidisciplinary; Water Resources	Geology; Water Resources	WoS
O'Neill, E	Expanding the horizons of integrated flood risk management: a critical analysis from an Irish perspective	INTERNATIONAL JOURNAL OF RIVER BASIN MANAGEMENT	Flood risk management; socio-hydrology; human-environment interaction; environmental behaviour	Millions of people around the world are exposed to some degree of flood hazard, with the level of exposure increasing with climate change. Arising from the scale of recent flood experiences across Europe, the European Union adopted the Floods Directive in 2007 to bring about greater assessment and management of flood risk across the EU and encapsulating the paradigm shift that involves a more hol…	eoin.oneill@ucd.ie	2018	16	1	71	77		10.1080/15715124.2017.1351979	Water Resources	Water Resources	WoS
Chen, LM; Roy, SB; Hutton, PH	Emulation of a process-based estuarine hydrodynamic model	HYDROLOGICAL SCIENCES JOURNAL-JOURNAL DES SCIENCES HYDROLOGIQUES	estuarine water quality; artificial neural network; neuroemulation; San Francisco Bay-Delta	Emulation modelling can be an effective alternative to traditional mechanistic approaches for complex environmental systems and, if carefully conceived, can offer significantly reduced run times and user expertise requirements. We present a case study of dynamic emulation for the domain of estuarine water quality modelling, by reporting the development and evaluation of a one-dimensional hydrodyn…	sujoy.roy@tetratech.com	2018	63	5	783	802		10.1080/02626667.2018.1447112	Water Resources	Water Resources	WoS
Wescoat, JL; Siddiqi, A; Muhammad, A	Socio-Hydrology of Channel Flows in Complex River Basins: Rivers, Canals, and Distributaries in Punjab, Pakistan	WATER RESOURCES RESEARCH		This paper presents a socio-hydrologic analysis of channel flows in Punjab province of the Indus River basin in Pakistan. The Indus has undergone profound transformations, from large-scale canal irrigation in the mid-nineteenth century to partition and development of the international river basin in the mid-twentieth century, systems modeling in the late-twentieth century, and new technologies fo…	wescoat@mit.edu	2018	54	1	464	479		10.1002/2017WR021486	Environmental Sciences; Limnology; Water Resources	Environmental Sciences & Ecology; Marine & Freshwater Biology; Water Resources	WoS
Sekhar, M; Tomer, SK; Thiyaku, S; Giriraj, P; Murthy, S; Mehta, VK	Groundwater Level Dynamics in Bengaluru City, India	SUSTAINABILITY	groundwater dynamics; Bengaluru; monitoring; groundwater balance; India	Groundwater accounts for half of Indian urban water use. However, little is known about its sustainability, because of inadequate monitoring and evaluation. We deployed a dense monitoring network in 154 locations in Bengaluru, India between 2015 and 2017. Groundwater levels collected at these locations were analyzed to understand the behavior of the city's groundwater system. At a local scale, gr…	sekhar.muddu@gmail.com; sat@aapahinnovations.com; thiyaku@aapahinnovations.com; girirajpr@gmail.com; sanjeeva248044@gmail.com; vishal.mehta@sei-us.org	2018	10	1			26	10.3390/su10010026	Green & Sustainable Science & Technology; Environmental Sciences; Environmental Studies	Science & Technology - Other Topics; Environmental Sciences & Ecology	WoS
Lerner A.M., Eakin H.C., Tellman E., Bausch J.C., Hernández Aguilar B.	Governing the gaps in water governance and land-use planning in a megacity: The example of hydrological risk in Mexico City	Cities	Hydrological risk; Informality; Mexico City; Urban water governance	Megacities are socio-ecological systems (SES) that encompass complex interactions between residents, institutions, and natural resource management. These interactions are exacerbated by climate change as resources such as water become scarce or hazardous through drought and flooding. In order to develop pathways for improved sustainability, the disparate factors that create vulnerable conditions …	Lerner, A.M.; Laboratorio Nacional de Ciencias de la Sostenibilidad, A.P. 70-275 Circuito Exterior, Ciudad Universitaria, Coyoacán, C.P., Mexico; email: amy.lerner@iecologia.unam.mx	2018	83		61	70		10.1016/j.cities.2018.06.009			Scopus
Lei X., Zhao J., Wang D., Sivapalan M.	A Budyko-type model for human water consumption	Journal of Hydrology	Budyko equation; Human water consumption; Optimality; Socio-hydrology; Water management	Budyko-type models in hydrology are simple but efficient descriptions of the vegetation-mediated hydrologic cycle in catchments. Based on hypothesized similarities between vegetation and human water consumption interactions in terms of water demand, constraints, and system functioning as well as catchment processes and outcomes, a corresponding Budyko-type framework is proposed here for human wat…	Zhao, J.; State Key Laboratory of Hydro-Science and Engineering, China; email: zhaojianshi@tsinghua.edu.cn	2018	567		212	226		10.1016/j.jhydrol.2018.10.021			Scopus
Callegary J.B., Megdal S.B., Tapia Villaseñor E.M., Petersen-Perlman J.D., Minjárez Sosa I., Monreal R., Gray F., Grijalva Noriega F.	Findings and lessons learned from the assessment of the Mexico-United States transboundary San Pedro and Santa Cruz aquifers: The utility of social science in applied hydrologic research	Journal of Hydrology: Regional Studies	Groundwater; Hydrogeology; Socio-hydrology; Transboundary aquifers; US-Mexico	Study Region: This study region encompasses the Transboundary San Pedro and Santa Cruz aquifers which are shared between the states of Sonora (Mexico) and Arizona (US). Special regional considerations include a semi-arid climate, basin-fill aquifers with predominantly montane recharge areas, economic drivers in the mining, trade, and military sectors, groundwater-dependent cities with expanding c…	Callegary, J.B.USGS 520 N Park Ave, United States; email: jcallega@usgs.gov	2018	20		60	73		10.1016/j.ejrh.2018.08.002			Scopus
Shelton R.E., Baeza A., Janssen M.A., Eakin H.	Managing household socio-hydrological risk in Mexico city: A game to communicate and validate computational modeling with stakeholders	Journal of Environmental Management	Mexico; Model validation; Multi-stakeholder modeling; Role-play games; Water resources management	Residents of Mexico City experience major hydrological risks, including flooding events and insufficient potable water access for many households. A participatory modeling project, MEGADAPT, examines hydrological risk as co-constructed by both biophysical and social factors and aims to explore alternative scenarios of governance. Within the model, neighborhoods are represented as agents that take…	Shelton, R.E.; School of Sustainability, 800 Cady Mall #108, United States; email: Rebecca.Shelton@asu.edu	2018	227		200	208		10.1016/j.jenvman.2018.08.094			Scopus
Al-Amin S., Berglund E.Z., Mahinthakumar G., Larson K.L.	Assessing the effects of water restrictions on socio-hydrologic resilience for shared groundwater systems	Journal of Hydrology	Agent-based model; Complex adaptive system; Demand management; Groundwater management; Sustainability index; Water shortage	Groundwater resources are shared across management boundaries. Multiple management units that differ in scale, constraints and objectives may manage a shared resource in a decentralized approach. The interactions among water managers, water users, and the water resource components influence the performance of management strategies and the resilience of community-level water supply and groundwater…	Al-Amin, S.; Civil, United States; email: salamin@ncsu.edu	2018	566		872	885		10.1016/j.jhydrol.2018.08.045			Scopus
Garcia M., Islam S.	The role of external and emergent drivers of water use change in Las Vegas	Urban Water Journal	demand modeling; socio-hydrology; Water use	Over the past twenty-five years, per capita water use has declined in many US cities. Technological and policy changes partially explain this decline, but variables beyond the control of water managers also influence water use including external (e.g. drought) and emergent (e.g. public attention) changes. Importantly, these variables interact and the relationships between these variables and wate…	Garcia, M.; School of Sustainable Engineering and the Built Environment, United States; email: M.Garcia@asu.edu	2018	15	9	888	898		10.1080/1573062X.2019.1581232			Scopus
Ruknul Ferdous M., Wesselink A., Brandimarte L., Slager K., Zwarteveen M., Di Baldassarre G.	Socio-hydrological spaces in the Jamuna River floodplain in Bangladesh	Hydrology and Earth System Sciences		Socio-hydrology aims to understand the dynamics and co-evolution of coupled human-water systems, with research consisting of generic models as well as specific case studies. In this paper, we propose a concept to help bridge the gap between these two types of socio-hydrological studies: socio-hydrological spaces (SHSs). A socio-hydrological space is a geographical area in a landscape. Its particu…	Ruknul Ferdous, M.; Department of Integrated Water Systems and Governance, Netherlands; email: r.ferdous@un-ihe.org	2018	22	10	5159	5173		10.5194/hess-22-5159-2018			Scopus
MacVean L.J., Thompson S., Hutton P., Sivapalan M.	Reconstructing Early Hydrologic Change in the California Delta and its Watersheds	Water Resources Research	anthropogenic change; California Delta; modeling; nonstationary; reconstruction; sociohydrology	Regulatory goals for the California Delta attempt to restore natural ecosystems through various water management efforts. Defining management criteria for restoration is challenging, given that the earliest data describing the hydrology of the region follow many decades of change associated with agricultural development, channel modification, and flood control. This study explores the hydrology o…	MacVean, L.J.; Department of Civil and Environmental Engineering, United States; email: lissajm@umich.edu	2018	54	10	7767	7790		10.1029/2017WR021426			Scopus
Pan H., Deal B., Destouni G., Zhang Y., Kalantari Z.	Sociohydrology modeling for complex urban environments in support of integrated land and water resource management practices	Land Degradation and Development	hydrological modeling; integrated water resource management; land use modeling; regional economy; stormwater management	This paper argues that a systems' thinking and explicit modeling approach is needed to address noted weaknesses (in terms of practicality and usefulness) in integrated water resource management. A process of coupling complex regional land use, economy, and water system interactions in integrated modeling is demonstrated with proof-of-concept applications to two urban cases (Chicago and Stockholm)…	Kalantari, Z.; Department of Physical Geography, Sweden; email: zahra.kalantari@natgeo.su.se	2018	29	10	3639	3652		10.1002/ldr.3106			Scopus
Horn F., Elagib N.A.	Building socio-hydrological resilient cities against flash floods: Key challenges and a practical plan for arid regions	Journal of Hydrology	Integrated flash flood management; Management challenges; Resilience; Socio-hydrology; Sudan; Urban flash flood	The objective of this research is to improve the understanding and recognition of the management challenges to flash flooding hazards and the potential adaptive measures within the arid urban areas through a socio-hydrological framework. Considering the capital of Sudan, Khartoum, as an example of urban arid areas with increasing flash flood risk, the analysis was founded on expert views and opin…	Elagib, N.A.; Institute for Technology and Resources Management in the Tropics and Subtropics (ITT), Technische Hochschule Köln, Betzdorferstr. 2, Germany; email: nadir.elagib@th-koeln.de	2018	564		125	132		10.1016/j.jhydrol.2018.07.001			Scopus
Conrad S.A., Yates D.	Coupling stated preferences with a hydrological water resource model to inform water policies for residential areas in the Okanagan Basin, Canada	Journal of Hydrology	Consumer stated preferences; Coupled socio-hydrological model; Socio-ecological systems; Water policymaking; Water resource models; Water supply and demand	To improve the behavioural realism of a water resource model, this study coupled hydrologic modelling with stated preference research, thereby incorporating an empirical estimate of behavioural parameters to represent residents’ landscape decisions in an urban environment. The stated preference data came from a discrete choice experiment in which residents were asked to choose among several possi…	Conrad, S.A.; School of Resource and Environmental Management, 8888 University Dr, Canada; email: steve.conrad@sfu.ca	2018	564		846	858		10.1016/j.jhydrol.2018.07.031			Scopus
Essenfelder A.H., Pérez-Blanco C.D., Mayer A.S.	Rationalizing Systems Analysis for the Evaluation of Adaptation Strategies in Complex Human-Water Systems	Earth's Future	adaptation strategies; human behavior; human-water systems; hydro-economic model; socio-hydrology; systems analysis	Water resources management is a nontrivial process requiring a holistic understanding of the factors driving the dynamics of human-water systems. Policy-induced or autonomous behavioral changes in human systems may affect water and land management, which may affect water systems and feedback to human systems, further impacting water and land management. Currently, hydro-economic models lack the a…	Essenfelder, A.H.; CMCC Foundation - Euro-Mediterranean Center on Climate Change and Ca' Foscari University of VeniceItaly; email: arthur.essenfelder@unive.it	2018	6	9	1181	1206		10.1029/2018EF000826			Scopus
Wu J., Fang W., Hu Z., Hong B.	Application of Bayesian approach to dynamic assessment of flood in urban underground spaces	Water (Switzerland)	Communication; Engagement; Groundwater management; Socio-economic aspects; Socio-hydrogeology	The trouble with groundwater is that despite its critical importance to global water supplies, it frequently attracts insufficient management attention relative to more visible surface water sources, irrespective of regional climate, socioeconomic profile, and regulatory environment. To this end, the recently defined sub-discipline of "socio-hydrogeology", an extension of socio-hydrology, seeks t…	Wu, J.; Department of Safety Technology and Management, China; email: jiansongwu@hotmail.com	2018	10	9			1112	10.3390/w10091112			Scopus
Nakamura S., Oki T.	Paradigm Shifts on Flood Risk Management in Japan: Detecting Triggers of Design Flood Revisions in the Modern Era	Water Resources Research	design flood; flood risk management; Japan; paradigm shift; sociohydrology	Flood risk management (FRM) has repeatedly evolved through paradigm shifts in human history. In modern FRM, a design flood, which reflects the protection standard or safety level of the FRM, is one of the most important elements. It has been historically revised and increased to reflect the sociohydrological situation of each era. Through this study we aimed to identify these changes to FRM and t…	Nakamura, S.; Department of Civil Engineering, Japan; email: shinichiro@civil.nagoya-u.ac.jp	2018	54	8	5504	5515		10.1029/2017WR022509			Scopus
Siddiqi A., Wescoat J.L., Jr., Muhammad A.	Socio-hydrological assessment of water security in canal irrigation systems: A conjoint quantitative analysis of equity and reliability	Water Security	Equity; Indus basin; Irrigation performance; Irrigation system; Reliability; Socio-hydrology	This paper offers a socio-hydrological assessment of water security that compares canal irrigation entitlements with water deliveries using a conjoint analysis of system reliability and equity. We develop a set of definitions and metrics to quantitatively characterize reliability and equity using newly available datasets of 10-daily canal deliveries from 2007–2017 in the Punjab canal command area…	Siddiqi, A.; Massachusetts Institute of Technology, 77 Massachusetts Avenue, 33-410, United States; email: siddiqi@mit.edu	2018	2021-05-04		44	55		10.1016/j.wasec.2018.11.001			Scopus
Jaramillo L.V., Stone M.C., Morrison R.R.	An indicator-based approach to assessing resilience of socio-hydrologic systems in Nepal to hydropower development	Journal of Hydrology		Resilience is essential to the integrity of socio-hydrologic systems, especially when faced with stress caused by natural hazards and economic development. Nepal has seen both in recent years. The objective of this study is to construct and implement an indicator-based approach to assess socio-hydrological systems with new metrics to evaluate the influence of hydropower development. We adopted a …	Jaramillo, L.V.; Department of Civil, United States; email: lvjaramillo@alumni.stanford.edu	2018	563		1111	1118		10.1016/j.jhydrol.2018.05.070			Scopus
Xu L., Gober P., Wheater H.S., Kajikawa Y.	Reframing socio-hydrological research to include a social science perspective	Journal of Hydrology	Bibliographic metrics; Human-water interaction; Interdisciplinary; Network analysis; System dynamics	There is increasing recognition of the need to incorporate the complex and dynamic interactions between society and water in studies of water resource systems. The study of human-water dynamics requires the involvement of researchers from different disciplines, including hydrology and social science. This paper tracks recent trends in socio-hydrological research using quantitative and qualitative…	Xu, L.; Global Institute for Water Security, 11 Innovation Boulevard, Canada; email: li.xu@usask.ca	2018	563		76	83		10.1016/j.jhydrol.2018.05.061			Scopus
Hund S.V., Allen D.M., Morillas L., Johnson M.S.	Groundwater recharge indicator as tool for decision makers to increase socio-hydrological resilience to seasonal drought	Journal of Hydrology	Adaptation; Drought; Groundwater recharge; Resilience; Socio-hydrology; Wet-dry tropics	Communities in regions with seasonal rainfall face annual dry seasons, during which water shortages and conflicts between different water use sectors may erupt. These difficulties increase following wet seasons with low rainfall, such as in relation to El Niño events in the wet-dry tropics of Central America. Hydrologic data are typically scarce in this region, making the development of drought a…	Hund, S.V.; Department of Earth, Canada; email: shund@eoas.ubc.ca	2018	563		1119	1134		10.1016/j.jhydrol.2018.05.069			Scopus
Horton A.J., Lazarus E.D., Hales T.C., Constantine J.A., Bruford M.W., Goossens B.	Can Riparian Forest Buffers Increase Yields From Oil Palm Plantations?	Earth's Future	Borneo; coupled human-landscape systems; ecosystem services; forest conservation; social-ecological systems; socio-hydrology	Forests on tropical floodplains across Southeast Asia are being converted to oil palm plantations. Preserving natural riparian forest corridors along rivers that pass through oil palm plantations has clear benefits for ecological conservation, but these corridors (also called buffers) use land that is potentially economically valuable for agriculture. Here we examine how riparian forest buffers r…	Horton, A.J.; School of Earth and Ocean Sciences, United Kingdom; email: hortonaj1@cardiff.ac.uk	2018	6	8	1082	1096		10.1029/2018EF000874			Scopus
O'Keeffe J., Moulds S., Bergin E., Brozović N., Mijic A., Buytaert W.	Including Farmer Irrigation Behavior in a Sociohydrological Modeling Framework With Application in North India	Water Resources Research	behavior; India; irrigation; modeling; sociohydrology; water security	Understanding water user behavior and its potential outcomes is important for the development of suitable water resource management options. Computational models are commonly used to assist water resource management decision making; however, while natural processes are increasingly well modeled, the inclusion of human behavior has lagged behind. Improved representation of irrigation water user be…	O'Keeffe, J.; Department of Civil and Environmental Engineering, United Kingdom; email: jimmy.okeeffe@imperial.ac.uk	2018	54	7	4849	4866		10.1029/2018WR023038			Scopus
Wiegleb V., Bruns A.	Hydro-social arrangements and paradigmatic change in water governance: an analysis of the sustainable development goals (SDGs)	Sustainability Science	Hydro-social cycle; Policy and paradigm change; SDGs; Water governance	SDG 6 presents a global water agenda and an important opportunity to steer development trajectories towards a water-secure world. Based on semi-structured interviews and a political ecology perspective, this study takes water and SDG 6 as a focal point to analyze the shift from MDGs to SDGs in terms of underlying governance paradigms and policy change dynamics. Results indicate that the water-rel…	Wiegleb, V.; Governance and Sustainability Lab, Behringstraße 21, Germany; email: wiegleb@uni-trier.de	2018	13	4	1155	1166		10.1007/s11625-017-0518-1			Scopus
Keys P.W., Wang-Erlandsson L.	On the social dynamics of moisture recycling	Earth System Dynamics		The biophysical phenomenon of terrestrial moisture recycling connects distant regions via the atmospheric branch of the water cycle. This process, whereby the land surface mediates evaporation to the atmosphere and the precipitation that falls downwind, is increasingly well-understood. However, recent studies highlight a need to consider an important and often missing dimension-the social. Here, …	Keys, P.W.; School of Global Environmental Sustainability, United States; email: patrick.keys@colostate.edu	2018	9	2	829	847		10.5194/esd-9-829-2018			Scopus
Baeza A., Estrada-Barón A., Serrano-Candela F., Bojórquez L.A., Eakin H., Escalante A.E.	Biophysical, infrastructural and social heterogeneities explain spatial distribution of waterborne gastrointestinal disease burden in Mexico City	Environmental Research Letters	flooding; giardiasis; Mexico City; neighborhood effect; spatial statistics; water management	Due to unplanned growth, large extension and limited resources, most megacities in the developing world are vulnerable to hydrological hazards and infectious diseases caused by waterborne pathogens. Here we aim to elucidate the extent of the relation between the spatial heterogeneity of physical and socio-economic factors associated with hydrological hazards (flooding and scarcity) and the spatia…	Escalante, A.E.; Laboratorio Nacional de Ciencias de la Sostenibilidad (LANCIS), Mexico; email: aescalante@iecologia.unam.mx	2018	13	6			64016	10.1088/1748-9326/aac17c			Scopus
Sapountzaki K., Daskalakis I.	Expansionary Adaptive Transformations of Socio-Hydrological Systems (SHSs): The Case of Drought in Messara Plain, Crete, Greece	Environmental Management	Adaptation limit; Drought; Resilience; SES; Social-hydrological systems; Sustainability	The paper attempts to document the ontology of socio-hydrological systems (SHSs), propose approaches of delimitation of SHSs’ (territorial) boundaries, and investigate operational aspects of their adaptation to drought including repercussions on sustainability. To this end, a series of hypotheses are tested: (a) SHSs contain social subsystems with different expectations regarding water resources,…	Daskalakis, I.; Harokopio UniversityGreece; email: i.daskalakis@gmail.com	2018	61	5	819	833		10.1007/s00267-018-1012-y			Scopus
Chen L., Roy S.B., Hutton P.H.	Emulation of a process-based estuarine hydrodynamic model	Hydrological Sciences Journal	artificial neural network; estuarine water quality; neuroemulation; San Francisco Bay-Delta	Emulation modelling can be an effective alternative to traditional mechanistic approaches for complex environmental systems and, if carefully conceived, can offer significantly reduced run times and user expertise requirements. We present a case study of dynamic emulation for the domain of estuarine water quality modelling, by reporting the development and evaluation of a one-dimensional hydrodyn…	Roy, S.B.; Research and Development, United States; email: sujoy.roy@tetratech.com	2018	63	5	783	802		10.1080/02626667.2018.1447112			Scopus
Leong C.	The Role of Narratives in Sociohydrological Models of Flood Behaviors	Water Resources Research	embankments; flood behavior; narratives; resilience; sociohydrology; system dynamics	While current efforts to model sociohydrologic phenomena provide crucial insight, critics argue that these do not fully reflect the complexity one observes empirically in the real world. The policy sciences, with its focus on the interaction between human agency and the institutions that constrain public choice, can complement such efforts by providing a narrative approach. This paper demonstrate…	Leong, C.; Institute of Water Policy, Singapore; email: ching@nus.edu.sg	2018	54	4	3100	3121		10.1002/2017WR022036			Scopus
Breyer B., Zipper S.C., Qiu J.	Sociohydrological Impacts of Water Conservation Under Anthropogenic Drought in Austin, TX (USA)	Water Resources Research	anthropogenic drought; cross-scale interactions; sociohydrology; urban climate change adaptation; water conservation	Municipal water providers increasingly respond to drought by implementing outdoor water use restrictions to reduce urban water withdrawals and maintain water availability. However, restricting urban outdoor water use to support watershed-scale drought resilience may generate unanticipated cross-scale interactions, for example, by altering drought response and recovery in urban vegetation or urban…	Breyer, B.; Department of Geography and Geographic Information Science, United States; email: breyer3@illinois.edu	2018	54	4	3062	3080		10.1002/2017WR021155			Scopus
Kuil L., Evans T., McCord P.F., Salinas J.L., Blöschl G.	Exploring the Influence of Smallholders' Perceptions Regarding Water Availability on Crop Choice and Water Allocation Through Socio-Hydrological Modeling	Water Resources Research	adaption; agriculture; modeling; smallholder; socio-hydrology; water scarcity	While it is known that farmers adopt different decision-making behaviors to cope with stresses, it remains challenging to capture this diversity in formal model frameworks that are used to advance theory and inform policy. Guided by cognitive theory and the theory of bounded rationality, this research develops a novel, socio-hydrological model framework that can explore how a farmer's perception …	Kuil, L.; Centre for Water Resource Systems, Austria; email: kuil@waterresources.at	2018	54	4	2580	2604		10.1002/2017WR021420			Scopus
Sung K., Jeong H., Sangwan N., Yu D.J.	Effects of Flood Control Strategies on Flood Resilience Under Sociohydrological Disturbances	Water Resources Research	adaptive capacity; community resilience; flood control; human-water interaction; sociohydrologic modeling	A community capacity to cope with flood hazards, or community flood resilience, emerges from the interplay of hydrological and social processes. This interplay can be significantly influenced by the flood control strategy adopted by a society, i.e., how a society sets its desired flood protection level and strives to achieve this goal. And this interplay can be further complicated by rising land-…	Yu, D.J.; Lyles School of Civil Engineering, United States; email: davidyu@purdue.edu	2018	54	4	2661	2680		10.1002/2017WR021440			Scopus
Wurl J., Gámez A.E., Ivanova A., Imaz Lamadrid M.A., Hernández-Morales P.	Socio-hydrological resilience of an arid aquifer system, subject to changing climate and inadequate agricultural management: A case study from the Valley of Santo Domingo, Mexico	Journal of Hydrology	Arid ecosystem; MODFLOW; Overexploitation; Socio-hydrological system; Water security	Mismanagement has caused the overexploitation of one third of the major aquifers in Mexico, mainly due to excessive water extraction for agricultural irrigation. Santo Domingo (Baja California Sur, in northern Mexico, where agriculture absorbs nearly 80% of water) is the only aquifer in the Mexico where, after a period of overexploitation, equality between extraction and recharge rates was achiev…	Wurl, J.; Universidad Autónoma de Baja California Sur, Carretera al Sur Km, 5.5 s/n Mezquitito, La Paz, Mexico; email: jwurl@uabcs.mx	2018	559		486	498		10.1016/j.jhydrol.2018.02.050			Scopus
Magdaleno F.	Flows, ecology and people: Is there room for cultural demands in the assessment of environmental flows?	Water Science and Technology	Ecohydrology; Environmental demands; Instream flows; Socio-hydrology; Water requirements	The science and practice of environmental flows - aimed at the protection of ecosystem values and functions in regulated rivers - has progressively recognized the relevance of incorporating sociocultural demands of local communities in the calculation of water requirements of rivers' habitats and services. This review paper synthesizes the concept of cultural flows, and presents the main approach…	Magdaleno, F.; Centre for Studies and Experimentation on Public Works (Cedex), Alfonso XII, 3, Spain; email: fernando.magdaleno@cedex.es	2018	77	7	1777	1781		10.2166/wst.2018.075			Scopus
Mason E., Giuliani M., Castelletti A., Amigoni F.	Identifying and Modeling Dynamic Preference Evolution in Multipurpose Water Resources Systems	Water Resources Research	coupled human-natural systems; multipurpose reservoir; negotiation protocol; sociohydrology; tradeoff analysis; water management	Multipurpose water systems are usually operated on a tradeoff of conflicting operating objectives. Under steady state climatic and socioeconomic conditions, such tradeoff is supposed to represent a fair and/or efficient preference. Extreme variability in external forcing might affect water operators' risk aversion and force a change in her/his preference. Properly accounting for these shifts is k…	Castelletti, A.; Department of Electronics, Italy; email: andrea.castelletti@polimi.it	2018	54	4	3162	3175		10.1002/2017WR021431			Scopus
Gunda T., Turner B.L., Tidwell V.C.	The Influential Role of Sociocultural Feedbacks on Community-Managed Irrigation System Behaviors During Times of Water Stress	Water Resources Research	climate change; community-managed irrigation; coupled natural and human systems; interdisciplinary modeling; sociocultural dynamics	Sociohydrological studies use interdisciplinary approaches to explore the complex interactions between physical and social water systems and increase our understanding of emergent and paradoxical system behaviors. The dynamics of community values and social cohesion, however, have received little attention in modeling studies due to quantification challenges. Social structures associated with com…	Gunda, T.; Sandia National LaboratoriesUnited States; email: tgunda@sandia.gov	2018	54	4	2697	2714		10.1002/2017WR021223			Scopus
Hynds P., Naughton O., O'Neill E., Mooney S.	Efficacy of a national hydrological risk communication strategy: Domestic wastewater treatment systems in the Republic of Ireland	Journal of Hydrology	Engagement; Policy; Regulation; Risk communication; Socio-hydrology; Wastewater treatment	A significant body of research has focused on the role of domestic wastewater treatment systems (DWWTSs) as sources of human-specific aquatic contaminants in both developed and developing regions. However, to date few studies have sought to investigate the awareness, attitudes and behaviours of DWWTS owners and the efficacy of associated communication initiatives. The current study provides an ex…	Hynds, P.; Environmental Sustainability and Health Institute, Ireland; email: hyndsp@tcd.ie	2018	558		205	213		10.1016/j.jhydrol.2018.01.041			Scopus
Roobavannan M., Van Emmerik T.H.M., Elshafei Y., Kandasamy J., Sanderson M.R., Vigneswaran S., Pande S., Sivapalan M.	Norms and values in sociohydrological models	Hydrology and Earth System Sciences		Sustainable water resources management relies on understanding how societies and water systems coevolve. Many place-based sociohydrology (SH) modeling studies use proxies, such as environmental degradation, to capture key elements of the social component of system dynamics. Parameters of assumed relationships between environmental degradation and the human response to it are usually obtained thro…	Kandasamy, J.; School of Civil and Environmental Engineering, Australia; email: jaya.kandasamy@uts.edu.au	2018	22	2	1337	1349		10.5194/hess-22-1337-2018			Scopus
Haeffner M., Jackson-Smith D., Flint C.G.	Social Position Influencing the Water Perception Gap Between Local Leaders and Constituents in a Socio-Hydrological System	Water Resources Research	coupled human-water systems; leader-constituent interactions; local water governance; socio-hydrology; urban water; water conservation	How well city leaders represent their constituents and meet their needs are key concerns in transitioning to local sustainable water governance. To date, however, there is little research documenting the influence of social position between elected leaders who make policy, career staff water managers who design and operate systems and implement policies, and the members of the public whose indivi…	Haeffner, M.; Department of Environmental Science and Management, United States; email: melissahaeffner@pdx.edu	2018	54	2	663	679		10.1002/2017WR021456			Scopus
Wescoat J.L., Jr., Siddiqi A., Muhammad A.	Socio-Hydrology of Channel Flows in Complex River Basins: Rivers, Canals, and Distributaries in Punjab, Pakistan	Water Resources Research	canal irrigation; channel flow; Indus River basin; Pakistan; Punjab; socio-hydrology	This paper presents a socio-hydrologic analysis of channel flows in Punjab province of the Indus River basin in Pakistan. The Indus has undergone profound transformations, from large-scale canal irrigation in the mid-nineteenth century to partition and development of the international river basin in the mid-twentieth century, systems modeling in the late-twentieth century, and new technologies fo…	Wescoat, J.L.; School of Architecture and Planning, United States; email: wescoat@mit.edu	2018	54	1	464	479		10.1002/2017WR021486			Scopus
Mostert E.	An alternative approach for socio-hydrology: Case study research	Hydrology and Earth System Sciences		Currently the most popular approach in socio hydrology is to develop coupled human–water models. This article proposes an alternative approach, qualitative case study research, involving a systematic review of (1) the human activities affecting the hydrology in the case, (2) the main human actors, and (3) the main factors influencing the actors and their activities. Moreover, this article present…	Mostert, E.; Department Water Management, Stevinweg 1, Netherlands; email: e.mostert@tudelft.nl	2018	22	1	317	329		10.5194/hess-22-317-2018			Scopus
Sarmiento, FO; Kooperman, GJ	A Socio-Hydrological Perspective on Recent and Future Precipitation Changes Over Tropical Montane Cloud Forests in the Andes	FRONTIERS IN EARTH SCIENCE	tropical montane cloud forests; precipitation change; socio-hydrology; Tropandean landscapes; earth system models; climate change		fsarmien@uga.edu	2019	7				324	10.3389/feart.2019.00324	Geosciences, Multidisciplinary	Geology	WoS
York, AM; Sullivan, A; Bausch, JC	Cross-scale interactions of socio-hydrological subsystems: examining the frontier of common pool resource governance in Arizona	ENVIRONMENTAL RESEARCH LETTERS	water; governance; socio-hydrology; coupled natural human system; telecoupling; scale	A critical frontier of water management in the western US is the challenge of cross-scale interactions. It is difficult to establish clear governance boundaries and collectively act when basins are interconnected, surface water and groundwater flows are interrelated, and urban and rural water demands are increasingly affected by regional and international telecoupling. Changing climate, snowpack,…	abigail.york@asu.edu	2019	14	12			125019	10.1088/1748-9326/ab51be	Environmental Sciences; Meteorology & Atmospheric Sciences	Environmental Sciences & Ecology; Meteorology & Atmospheric Sciences	WoS
Grames, J; Grass, D; Kort, PM; Prskawetz, A	Optimal investment and location decisions of a firm in a flood risk area using impulse control theory	CENTRAL EUROPEAN JOURNAL OF OPERATIONS RESEARCH	Optimal investment; Location choice; Flood; Socio-hydrology; Impulse control theory; Sustainability	Flooding events can affect businesses close to rivers, lakes or coasts. This paper provides an economic partial equilibrium model, which helps to understand the optimal location choice for a firm in flood risk areas and its investment strategies. How often, when and how much are firms willing to invest in flood risk protection measures? We apply Impulse Control Theory and develop a continuation a…	johanna.grames@tuwien.ac.at; dieter.grass@tuwien.ac.at; kort@tilburguniversity.edu; afp@econ.tuwien.ac.at	2019	27	4	1051	1077		10.1007/s10100-018-0532-0	Operations Research & Management Science	Operations Research & Management Science	WoS
Huber, L; Bahro, N; Leitinger, G; Tappeiner, U; Strasser, U	Agent-Based Modelling of a Coupled Water Demand and Supply System at the Catchment Scale	SUSTAINABILITY	agent-based modelling; resources demand and supply; socio-hydrology; NetLogo	Water is of uttermost importance for human well-being and a central resource in sustainable development. Many simulation models for sustainable water management, however, lack explanatory and predictive power because the two-way dynamic feedbacks between human and water systems are neglected. With Agent-based Modelling of Resources (Aqua.MORE; here, of the resource water), we present a platform t…	Lisa.Huber@uibk.ac.at; nico.bahro@googlemail.com; Georg.Leitinger@uibk.ac.at; Ulrike.Tappeiner@uibk.ac.at; Ulrich.Strasser@uibk.ac.at	2019	11	21			6178	10.3390/su11216178	Green & Sustainable Science & Technology; Environmental Sciences; Environmental Studies	Science & Technology - Other Topics; Environmental Sciences & Ecology	WoS
Salinas, CET; de Oliveira, VPV; Brito, L; Ferreira, AV; de Araujo, JC	Social impacts of a large-dam construction: the case of Castanhao, Brazil	WATER INTERNATIONAL	Dam construction; compulsory displacement; semi-arid regions; socio-hydrology; Brazil	Castanhao Dam, a mega-water-management work in Brazil, was built - according to the official reasoning - to reduce water scarcity and boost the economy. It compulsorily displaced over 10,000 people, whose satisfaction with the new standard of living, a decade after the resettlement, was marginally negative, contrasting with the pre-construction expectations. The government invested almost exclusi…	jcaraujo@ufc.br	2019	44	8	871	885		10.1080/02508060.2019.1677303	Engineering, Civil; Water Resources	Engineering; Water Resources	WoS
Perello-Moragues, A; Noriega, P; Poch, M	Modelling Contingent Technology Adoption in Farming Irrigation Communities	JASSS-THE JOURNAL OF ARTIFICIAL SOCIETIES AND SOCIAL SIMULATION	Agent-Based Modeling; Innovation Diffusion; Policy-Making; Irrigation Agriculture; Socio-Hydrology	Of all the uses of water, agriculture is the one that requires the greatest proportion of resources worldwide. Consequently, it is a salient subject for environmental policy-making, and adoption of modern irrigation systems is a key means to improve water use efficiency. In this paper we present an agent-based model of the adoption process - known as modernisation - of a community constituted by …	antonio.perello@fcc.es	2019	22	4			1	10.18564/jasss.4100	Social Sciences, Interdisciplinary	Social Sciences - Other Topics	WoS
Abebe, YA; Ghorbani, A; Nikolic, I; Vojinovic, Z; Sanchez, A	Flood risk management in Sint Maarten - A coupled agent-based and flood modelling method	JOURNAL OF ENVIRONMENTAL MANAGEMENT	Flood risk management; Agent-based modelling; Socio-hydrology; Small island development states; Sint maarten	Disaster risk reduction is a major concern of small island developing states. Measures to reduce risk should not only be based on the magnitude of physical hazard, but also on the exposure and vulnerability of communities. In this article, we examine flood risk management policies in the Caribbean island of Sint Maarten using coupled agent-based and flood models. The agent-based model is used to …	y.abebe@un-ihe.org	2019	248				109317	10.1016/j.jenvman.2019.109317	Environmental Sciences	Environmental Sciences & Ecology	WoS
van Oel, P; Chukalla, A; Vos, J; Hellegers, P	Using indicators to inform the sustainable governance of water-for-food systems	CURRENT OPINION IN ENVIRONMENTAL SUSTAINABILITY		As global demand for food increases and impacts of climate-related extremes become more severe new governance mechanisms have become relevant. Individual and collective efforts by actors in water-forfood governance could all contribute to sustainably managing the locally scarce water resources that are mobilized to meet the world's demand for food. This review synthesises insights from agricultur…	pieter.vanoel@wur.nl	2019	40		55	62		10.1016/j.cosust.2019.09.005	Green & Sustainable Science & Technology; Environmental Sciences	Science & Technology - Other Topics; Environmental Sciences & Ecology	WoS
Abadie, LM; Markandya, A; Neumann, MB	Accounting for Economic Factors in Socio-Hydrology: Optimization under Uncertainty and Climate Change	WATER	river flooding; extreme events; generalized extreme value distribution; non-stationarity; optimization under uncertainty	This paper reframes the socio-hydrology analysis as an optimization problem. To achieve this, we first develop a valuation scheme to estimate net benefits of development in a flood plain, consisting of benefits obtained from land and housing, less the costs of flood management and flood damage. Then we look for an optimal safety factor for the levee heightening strategy within the 'Technosociety'…	lm.abadie@bc3research.org; anil.markandya@bc3research.org; marc.neumann@bc3research.org	2019	11	10			2073	10.3390/w11102073	Environmental Sciences; Water Resources	Environmental Sciences & Ecology; Water Resources	WoS
Rusca, M; Di Baldassarre, G	Interdisciplinary Critical Geographies of Water: Capturing the Mutual Shaping of Society and Hydrological Flows	WATER	critical geography; interdisciplinary studies; socionatures; hydrosocial cycle; sociohydrology	In light of recent calls for an increased commitment to interdisciplinary endeavors, this paper reflects on the implications of a critical geography of water that crosses social and natural sciences. Questions on how to best research the relationship between water and society have been raised both in the field of critical geographies of water and sociohydrology. Yet, there has been little crossov…	maria.rusca@geo.uu.se; Giuliano.Dibaldassarre@geo.uu.se	2019	11	10			1973	10.3390/w11101973	Environmental Sciences; Water Resources	Environmental Sciences & Ecology; Water Resources	WoS
Hou, BD; Yang, RX; Zhou, YY; Xiao, WH; Wang, JH; Zhao, Y; Zhan, XZ	Evolution mechanisms and fundamental equations of social water cycle fluxes	HYDROLOGY RESEARCH	evolution mechanisms; social water cycle fluxes; socio-hydrology; water demand; water use	The rise of socio-hydrology, addressing the interactions between human and water systems, is regarded as an innovative perspective to researches achieving the sustainable use of water resources. Revealing the social water fluxes, in terms of magnitude, structure, and variations under changing environment, could advance the understanding of water cycling under the dual driving forces: natural and …	jhwangiwhr@126.com	2019	50	5	1344	1358		10.2166/nh.2019.115	Water Resources	Water Resources	WoS
Castilla-Rho, JC; Rojas, R; Andersen, MS; Holley, C; Mariethoz, G	Sustainable groundwater management: How long and what will it take?	GLOBAL ENVIRONMENTAL CHANGE-HUMAN AND POLICY DIMENSIONS	Socio-hydrology; Agent-based modelling; Social norms; Cultural values; World values survey; Enforcement; Regulation; Compliance	Groundwater depletion is arguably one of humanity's greatest sustainability challenges of the 21st century. With Sustainable Development Goals only a decade away, water authorities around the world are in the urgent need for concrete and targeted measures to ensure that communities adhere to groundwater management policies as rapidly and as effectively as possible. In this paper, we combine compu…	juan.castilla@uts.edu.au; Rodrigo.Rojas@csiro.au; m.andersen@unsw.edu.au; c.holley@unsw.edu.au; gregoire.mariethoz@unil.ch	2019	58				101972	10.1016/j.gloenvcha.2019.101972	Environmental Sciences; Environmental Studies; Geography	Environmental Sciences & Ecology; Geography	WoS
Garcia, M; Koebele, E; Deslatte, A; Ernst, K; Manago, KF; Treuer, G	Towards urban water sustainability: Analyzing management transitions in Miami, Las Vegas, and Los Angeles	GLOBAL ENVIRONMENTAL CHANGE-HUMAN AND POLICY DIMENSIONS	Water management; Transition; Sustainability; Urban; Socio-hydrology	As climate change challenges the sustainability of existing water supplies, many cities must transition toward more sustainable water management practices to meet demand. However, scholarly knowledge of the factors that drive such transitions is lacking, in part due to the dearth of comparative analyses in the existing transitions literature. This study seeks to identify common factors associated…	M.Garcia@asu.edu	2019	58				101967	10.1016/j.gloenvcha.2019.101967	Environmental Sciences; Environmental Studies; Geography	Environmental Sciences & Ecology; Geography	WoS
Maghsood, FF; Moradi, H; Berndtsson, R; Panahi, M; Daneshi, A; Hashemi, H; Bavani, ARM	Social Acceptability of Flood Management Strategies under Climate Change Using Contingent Valuation Method (CVM)	SUSTAINABILITY	Analytical Network Process; contingent valuation method; WTP; social acceptability; flood management	Floods are natural hazards with serious impact on many aspects of human life. The Intergovernmental Panel on Climate Change (IPCC) reported that climate change already has significant impact on magnitude and frequency of flood events worldwide. Thus, it is suggested to adopt strategies to manage damage impacts of climate change. For this, involving the local community in the decision-making proce…	f.maghsood@modares.ac.ir; hrmoradi@modares.ac.ir; ronny.berndtsson@tvrl.lth.se; m.panahi@srbiau.ac.ir; Alirezadaneshi91@gmail.com; hossein.hashemi@tvrl.lth.se; armassah@ut.ac.ir	2019	11	18			5053	10.3390/su11185053	Green & Sustainable Science & Technology; Environmental Sciences; Environmental Studies	Science & Technology - Other Topics; Environmental Sciences & Ecology	WoS
Pouladi, P; Afshara, A; Afshar, MH; Molajou, A; Farahmand, H	Agent-based socio-hydrological modeling for restoration of Urmia Lake: Application of theory of planned behavior	JOURNAL OF HYDROLOGY	Socio-hydrology; Agent-based model (ABM); Theory of planned behavior (TPB); Decision-making process; Urmia Lake	This study proposes a novel socio-hydrological modeling framework for assessing the performance of complex water resources systems. It employs and integrates agent-based modeling (ABM) and the theory of planned behavior (TPB) into the socio-hydrological modeling framework to account for agents' behaviors. Due to farmers' major role in anthropogenic droughts, this paper mainly focuses on farmers' …	a_afshar@iust.ac.ir	2019	576		736	748		10.1016/j.jhydrol.2019.06.080	Engineering, Civil; Geosciences, Multidisciplinary; Water Resources	Engineering; Geology; Water Resources	WoS
Jackowski, N; de Ostos, R	Chromatic Compositions: Design Dissonance and the Aesthetic of Fusion	ARCHITECTURAL DESIGN	NaJa & deOstos; Al Di Meola; John McLaughlin; Allan Holdsworth; chromatic scales; diatonic scales; Brazilian Amazon; Pregnant Island project; maloca; Architectural Association; Bartlett School of Architecture; University College London; A Centre for Socio-Hydrology; Varanasi; India; Cameron Overy; Cambodia; Raz Keltsh; Shadow Theatre Archive project; Ectoplasmatic Library; 'Brazil at Heart'; Braz…	The approach to beauty of London-based experimental architectural studio NaJa & deOstos is to explore traditional cultures and technological digital environments. Co-founders Ricardo de Ostos and Nannette Jackowski, who also lead Intermediate Unit 3 at the Architectural Association School of Architecture, here discuss how architectural language and its representation both reference and challenge …		2019	89	5	52	57		10.1002/ad.2479	Architecture	Architecture	WoS
Di Baldassarre, G; Sivapalan, M; Rusca, M; Cudennec, C; Garcia, M; Kreibich, H; Konar, M; Mondino, E; Mard, J; Pande, S; Sanderson, MR; Tian, FQ; Viglione, A; Wei, J; Wei, YP; Yu, DJ; Srinivasan, V; Bloschl, G	Sociohydrology: Scientific Challenges in Addressing the Sustainable Development Goals	WATER RESOURCES RESEARCH		The Sustainable Development Goals (SDGs) of the United Nations Agenda 2030 represent an ambitious blueprint to reduce inequalities globally and achieve a sustainable future for all mankind. Meeting the SDGs for water requires an integrated approach to managing and allocating water resources, by involving all actors and stakeholders, and considering how water resources link different sectors of so…	giuliano.dibaldassarre@geo.uu.se	2019	55	8	6327	6355		10.1029/2018WR023901	Environmental Sciences; Limnology; Water Resources	Environmental Sciences & Ecology; Marine & Freshwater Biology; Water Resources	WoS
Li, B; Sivapalan, M; Xu, XY	An Urban Sociohydrologic Model for Exploration of Beijing's Water Sustainability Challenges and Solution Spaces	WATER RESOURCES RESEARCH		The mismatch between water demand and water availability in many megacities poses vexing water management challenges. Managers are forced to take remedial efforts to address these challenges, often with a heavy focus on infrastructure solutions such as building reservoirs or interbasin transfers to meet demand, which may in fact exacerbate the problem through unintended consequences that arise fr…	libin@mail.bnu.edu.cn	2019	55	7	5918	5940		10.1029/2018WR023816	Environmental Sciences; Limnology; Water Resources	Environmental Sciences & Ecology; Marine & Freshwater Biology; Water Resources	WoS
Hynds, PD; Nasr, AE; O'Dwyer, J	Evaluation of hydrometric network efficacy and user requirements in the Republic of Ireland via expert opinion and statistical analysis	JOURNAL OF HYDROLOGY	Hydrometric measurement; Network design; Optimisation; Cross-sectional survey	Decreased funding and shifting governmental priorities have resulted in a contraction of hydrometric measurement in many regions over the past two decades. Moreover, concerns exist with respect to appropriate data usage and (transboundary) exchange, in addition to the compatibility and extent of existing hydrometric datasets. These issues are undoubtedly magnified due to enhanced data demands and…	hyndsp@tcd.ie	2019	574		851	861		10.1016/j.jhydrol.2019.04.086	Engineering, Civil; Geosciences, Multidisciplinary; Water Resources	Engineering; Geology; Water Resources	WoS
Caprario, J; Finotti, AR	Socio-technological tool for mapping susceptibility to urban flooding	JOURNAL OF HYDROLOGY	Flooding mapping; Social-hydrological tool; Socio-technological tool; Urban drainage; Flooding susceptibility	The intensification of flooding in urban areas and the management of susceptibility areas has become a global issue and has been the subject of several studies in recent decades. The integration of alternative approaches, such as socio-hydrological and socio-technological sciences, has gained prominence in urban space planning and development. The mapping of environmental susceptibility represent…	jakcemara@hotmail.com	2019	574		1152	1163		10.1016/j.jhydrol.2019.05.005	Engineering, Civil; Geosciences, Multidisciplinary; Water Resources	Engineering; Geology; Water Resources	WoS
Godinez-Madrigal, J; Van Cauwenbergh, N; van der Zaag, P	Production of competing water knowledge in the face of water crises: Revisiting the IWRM success story of the Lerma-Chapala Basin, Mexico	GEOFORUM	IWRM; Wicked problems; Epistemic controversies; Water scarcity; Water conflicts; Public participation; Water knowledge	Integrated Water Resources Management (IWRM) is an approach that aims to change conventional water management. International agencies and organizations have promoted IWRM across the globe. The Lerma-Chapala Basin in Mexico is an archetypal case study on basin closure, where IWRM principles were said to have been applied in the early 2000s to help solve a serious water crisis. This paper analyses …	j.godinezmadrigal@gmail.com	2019	103		3	15		10.1016/j.geoforum.2019.02.002	Geography	Geography	WoS
Wens, M; Johnson, JM; Zagaria, C; Veldkamp, TIE	Integrating human behavior dynamics into drought risk assessment-A sociohydrologic, agent-based approach	WILEY INTERDISCIPLINARY REVIEWS-WATER	adaptation; agent-based modeling; behavior; drought; risk; sociohydrology	Droughts are a persistent and costly hazard impacting human and environmental systems. As climate variability continues to increase and socioeconomic development influences the distribution of wealth and people, drought risk is expected to increase in many parts of the world. The unique characteristics of droughts-namely their slow onset, large spatiotemporal extent, human-influenced propagation,…	mike.johnson@geog.ucsb.edu	2019	6	4			e1345	10.1002/wat2.1345	Environmental Sciences; Water Resources	Environmental Sciences & Ecology; Water Resources	WoS
Sohns, A; Ford, J; Robinson, BE; Adamowski, J	What conditions are associated with household water vulnerability in the Arctic?	ENVIRONMENTAL SCIENCE & POLICY	Drinking water; Vulnerability; Arctic; Socio-hydrology	Increasing pressure on water resources from demographic shifts, climate change, and development patterns is affecting water access and water availability in Arctic households. There is an urgent need to improve understanding of the factors that contribute to Arctic household water vulnerability. This paper examines the key conditions or combinations of conditions associated with water access and …	antonia.sohns@mail.mcgill.ca	2019	97		95	105		10.1016/j.envsci.2019.04.008	Environmental Sciences	Environmental Sciences & Ecology	WoS
Baeza, A; Bojorquez-Tapia, LA; Janssen, MA; Eakin, H	Operationalizing the feedback between institutional decision-making, socio-political infrastructure, and environmental risk in urban vulnerability analysis	JOURNAL OF ENVIRONMENTAL MANAGEMENT	Governance; Multi-criteria; Agent-based model; Climate change; Water scarcity; Flooding; Protests; Multi-scale; Adaptation	Urban adaptation to climate change is likely to emerge from the responses of residents, authorities, and infrastructure providers to the impact of flooding, water scarcity, and other climate-related hazards. These responses are, in part, modulated by political relationships under cultural norms that dominate the institutional and collective decisions of public and private actors. The legacy of th…	abaezaca@asu.edu	2019	241		407	417		10.1016/j.jenvman.2019.03.138	Environmental Sciences	Environmental Sciences & Ecology	WoS
Sugeng, ES; Varma, N; Smith, ZA	EVALUATION OF THE NORMALISASI POLICY IN JAKARTA, INDONESIA USING SYSTEM DYNAMICS	LANDSCAPE ARCHITECTURE FRONTIERS	Floods; Jakarta; Normalisasi; System Dynamics; Social-Hydrological System; Dredging	Governance deficit in Jakarta, Indonesia is often associated to its pressing issues of too much, too little, and too dirty water. Although flood has become an important political issue and the government is pushing a landscape change in the riverbank areas, the public policy in Jakarta has yet to comprehend the complex linkages between the gap in water provisioning and flooding. Flood is one majo…	navarun@nus.edu.sg	2019	7	3	78	93		10.15302/J-LAF-1-020005	Architecture	Architecture	WoS
Wu, XD; Guo, JL; Li, CH; Shao, L; Han, MY; Chen, GQ	Global socio-hydrology: An overview of virtual water use by the world economy from source of exploitation to sink of final consumption	JOURNAL OF HYDROLOGY	Global socio-hydrology; World economy; Virtual water; Global supply chain; Trade imbalance	To reflect a key aspect of global socio-hydrology, this paper explores global virtual water use from source of exploitation to sink of final consumption via interregional trades within the world economy as reflected by world input-output database for 2014. An embodiment accounting model is developed, which takes full account of virtual water feedbacks related to primary inputs. Global total trade…	gqchen@pku.edu.cn	2019	573		794	810		10.1016/j.jhydrol.2019.03.080	Engineering, Civil; Geosciences, Multidisciplinary; Water Resources	Engineering; Geology; Water Resources	WoS
Nusser, M; Dame, J; Krause, B; Baghel, R; Schmidt, S	Socio-hydrology of artificial glaciers in Ladakh, India: assessing adaptive strategies in a changing cryosphere	REGIONAL ENVIRONMENTAL CHANGE	Climate change adaptation; Cold-arid region; Ice reservoirs; Irrigated agriculture; Water conservation; Socio-hydrology	The consequences of even small glacier decrease and changes of seasonal snow cover are critical for the functioning of meltwater-dependent mountain agriculture. In order to deal with recurrent water scarcity, different types of ice reservoirs, commonly called artificial glaciers, have been introduced in Ladakh and promoted as appropriate adaptive strategies to cope with changes in the cryosphere.…	marcus.nuesser@uni-heidelberg.de; juliane.dame@uni-heidelberg.de; benjamin-kraus@gmx.net; s.schmidt@uni-heidelberg.de	2019	19	5	1327	1337		10.1007/s10113-018-1372-0	Environmental Sciences; Environmental Studies	Environmental Sciences & Ecology	WoS
Ogilvie, A; Riaux, J; Massuel, S; Mulligan, M; Belaud, G; Le Goulven, P; Calvez, R	Socio-hydrological drivers of agricultural water use in small reservoirs	AGRICULTURAL WATER MANAGEMENT	Socio-hydrology; Remote sensing; Small reservoirs; Water harvesting; Tunisia	Millions of small reservoirs built across semi-arid areas present a potential to support agricultural livelihoods of rural smallholders. The scale and geographical dispersion of these multiple lakes restrict the understanding of these coupled human-water systems and the identification of adequate strategies to support riparian farmers. This research developed a multi-scalar interdisciplinary appr…	andrew.ogilvie@ird.fr	2019	218		17	29		10.1016/j.agwat.2019.03.001	Agronomy; Water Resources	Agriculture; Water Resources	WoS
Nusser, M; Dame, J; Parveen, S; Kraus, B; Baghel, R; Schmidt, S	Cryosphere-Fed Irrigation Networks in the Northwestern Himalaya: Precarious Livelihoods and Adaptation Strategies Under the Impact of Climate Change	MOUNTAIN RESEARCH AND DEVELOPMENT	Cryosphere dynamics; irrigation networks; adaptation strategies; sociohydrology; Himalaya; India; Pakistan	Irrigated agriculture is crucial for the livelihood security of mountain communities in the northwestern part of the Himalayan arc and adjoining regions of the Karakoram, Hindu Kush, and Trans-Himalaya. Using meltwater from glaciers, snow, and permafrost, mountain dwellers have developed sophisticated techniques to cope with recurrent water scarcity caused by glacier retreat, glacier thinning, an…	marcus.nuesser@uni-heidelberg.de	2019	39	2	R1	R11		10.1659/MRD-JOURNAL-D-18-00072.1	Environmental Sciences; Geography, Physical	Environmental Sciences & Ecology; Physical Geography	WoS
Tian, FQ; Lu, Y; Hu, HC; Kinzelbach, W; Sivapalan, M	Dynamics and driving mechanisms of asymmetric human water consumption during alternating wet and dry periods	HYDROLOGICAL SCIENCES JOURNAL-JOURNAL DES SCIENCES HYDROLOGIQUES	socio-hydrology; emergent dynamics; hydrological variability; human water consumption; prospect theory; threshold uncertainty	Increases in human water consumption (HWC) and consequent degradation of the ecological environment are common in arid regions. Understanding the mechanisms behind these processes is important for sustainable development. Analyses of changes in HWC between alternating wet and dry periods are carried out in four arid inland basins in Central Asia and China (Syr Darya, Tarim, Heihe and Shulehe rive…	tianfq@tsinghua.edu.cn	2019	64	5	507	524		10.1080/02626667.2019.1588972	Water Resources	Water Resources	WoS
Di Pelino, S; Schuster-Wallace, C; Hynds, PD; Dickson-Anderson, SE; Majury, A	A coupled-systems framework for reducing health risks associated with private drinking water wells	CANADIAN WATER RESOURCES JOURNAL		Privately owned wells are vulnerable to contamination and as such pose a significant public health threat to those who rely on them for domestic water use. While a myriad of studies have sought to individually examine well water quality or the stewardship behaviours among well owners and users, few have effectively explored the intersection between private groundwater contamination and human beha…	anna.majury@oahpp.ca	2019	44	3	280	290		10.1080/07011784.2019.1581663	Water Resources	Water Resources	WoS
Borga, M; Comiti, F; Ruin, I; Marra, F	Forensic analysis of flash flood response	WILEY INTERDISCIPLINARY REVIEWS-WATER	flash flood; flood risk; socio-hydrology; weather radar	The last decade has witnessed the development of methodologies for the post-flood documentation of both hydrogeomorphological and social response to extreme precipitation. These investigations are particularly interesting for the case of flash floods, whose space-time scales make their observations by conventional hydrometeorological monitoring networks particularly challenging. Effective flash f…	marco.borga@unipd.it	2019	6	2			e1338	10.1002/wat2.1338	Environmental Sciences; Water Resources	Environmental Sciences & Ecology; Water Resources	WoS
Kuil, L; Carr, G; Prskawetz, A; Salinas, JL; Viglione, A; Bloschl, G	Learning from the Ancient Maya: Exploring the Impact of Drought on Population Dynamics	ECOLOGICAL ECONOMICS	Population-resource model; Socio-hydrology; Virtual water; Drought; Vulnerability; Climate change	Understanding the relationship between drought and population dynamics is increasingly important, particularly in areas where high population growth corresponds with increasing drought risk due to climate change. We examine the relationship between drought events and population dynamics using a stylized hydrology-demography model that has been calibrated to simulate plausible feedbacks for the po…	kuil@waterresources.at	2019	157		1	16		10.1016/j.ecolecon.2018.10.018	Ecology; Economics; Environmental Sciences; Environmental Studies	Environmental Sciences & Ecology; Business & Economics	WoS
Barendrecht, MH; Viglione, A; Kreibich, H; Merz, B; Vorogushyn, S; Bloschl, G	The Value of Empirical Data for Estimating the Parameters of a Sociohydrological Flood Risk Model	WATER RESOURCES RESEARCH		In this paper, empirical data are used to estimate the parameters of a sociohydrological flood risk model. The proposed model, which describes the interactions between floods, settlement density, awareness, preparedness, and flood loss, is based on the literature. Data for the case study of Dresden, Germany, over a period of 200years, are used to estimate the model parameters through Bayesian inf…	barendrecht@hydro.tuwien.ac.at	2019	55	2	1312	1336		10.1029/2018WR024128	Environmental Sciences; Limnology; Water Resources	Environmental Sciences & Ecology; Marine & Freshwater Biology; Water Resources	WoS
Abebe, YA; Ghorbani, A; Nikolic, I; Vojinovic, Z; Sanchez, A	A coupled flood-agent-institution modelling (CLAIM) framework for urban flood risk management	ENVIRONMENTAL MODELLING & SOFTWARE	Coupled human-flood systems; Socio-hydrology; Institutions; Agent-based modelling; Flood risk management; Urban flood modelling	In this paper, we describe a modelling framework that allows the integration of human and physical components of flood risk. Within this framework, flood risk management is conceptualized as a coupled human-flood system. The human subsystem includes individuals and their behaviour and institutions that shape human-flood interaction. The framework presents a dynamic integration between agent-based…	y.abebe@un-ihe.org	2019	111		483	492		10.1016/j.envsoft.2018.10.015	Computer Science, Interdisciplinary Applications; Engineering, Environmental; Environmental Sciences; Water Resources	Computer Science; Engineering; Environmental Sciences & Ecology; Water Resources	WoS
York A.M., Sullivan A., Bausch J.C.	Cross-scale interactions of socio-hydrological subsystems: Examining the frontier of common pool resource governance in Arizona	Environmental Research Letters	Coupled natural human system; Governance; Scale; Socio-hydrology; Telecoupling; Water	A critical frontier of water management in the western US is the challenge of cross-scale interactions. It is difficult to establish clear governance boundaries and collectively act when basins are interconnected, surface water and groundwater flows are interrelated, and urban and rural water demands are increasingly affected by regional and international telecoupling. Changing climate, snowpack,…	York, A.M.; School of Human Evolution and Social Change, United States; email: abigail.york@asu.edu	2019	14	12			125019	10.1088/1748-9326/ab51be			Scopus
Sarmiento F.O., Kooperman G.J.	A Socio-Hydrological Perspective on Recent and Future Precipitation Changes Over Tropical Montane Cloud Forests in the Andes	Frontiers in Earth Science	climate change; earth system models; precipitation change; socio-hydrology; Tropandean landscapes; tropical montane cloud forests	[No abstract available]	Sarmiento, F.O.; Neotropical Montology Collaboratory and Climate, United States; email: fsarmien@uga.edu	2019	7				324	10.3389/feart.2019.00324			Scopus
Grames J., Grass D., Kort P.M., Prskawetz A.	Optimal investment and location decisions of a firm in a flood risk area using impulse control theory	Central European Journal of Operations Research	Flood; Impulse control theory; Location choice; Optimal investment; Socio-hydrology; Sustainability	Flooding events can affect businesses close to rivers, lakes or coasts. This paper provides an economic partial equilibrium model, which helps to understand the optimal location choice for a firm in flood risk areas and its investment strategies. How often, when and how much are firms willing to invest in flood risk protection measures? We apply Impulse Control Theory and develop a continuation a…	Grames, J.; Vienna University of Technology, Karlsplatz 13/222, Austria; email: johanna.grames@tuwien.ac.at	2019	27	4	1051	1077		10.1007/s10100-018-0532-0			Scopus
Salinas C.E.T., Oliveira V.P.V.D., Brito L., Ferreira A.V., de Araújo J.C.	Social impacts of a large-dam construction: the case of Castanhão, Brazil	Water International	Brazil; compulsory displacement; Dam construction; semi-arid regions; socio-hydrology	Castanhão Dam, a mega-water-management work in Brazil, was built–according to the official reasoning–to reduce water scarcity and boost the economy. It compulsorily displaced over 10,000 people, whose satisfaction with the new standard of living, a decade after the resettlement, was marginally negative, contrasting with the pre-construction expectations. The government invested almost exclusively…	de Araújo, J.C.; Department of Agricultural Engineering, Brazil; email: jcaraujo@ufc.br	2019	44	8	871	885		10.1080/02508060.2019.1677303			Scopus
Huber L., Bahro N., Leitinger G., Tappeiner U., Strasser U.	Agent-based modelling of a coupled water demand and supply system at the catchment scale	Sustainability (Switzerland)	Agent-based modelling; NetLogo; Resources demand and supply; Socio-hydrology	Water is of uttermost importance for human well-being and a central resource in sustainable development. Many simulation models for sustainable water management, however, lack explanatory and predictive power because the two-way dynamic feedbacks between human and water systems are neglected. With Agent-based Modelling of Resources (Aqua.MORE; here, of the resource water), we present a platform t…	Huber, L.; Department of Ecology, Sternwartestraße 15, Austria; email: Lisa.Huber@uibk.ac.at	2019	11	21			6178	10.3390/su11216178			Scopus
Parolari A.J., Manoli G.	Power Law Growth and Delayed Feedbacks in Socio-Hydrological Systems	Earth's Future		Water infrastructure dynamics result from coupled social and physical hydrological processes embedded in “socio-hydrological systems” (SHSs). Freshwater fuels socioeconomic activity, which in turn exerts pressure on water resources through increased water demand and water quality degradation. Many factors emphasize the need for quantitative tools to predict the future of these systems, including …	Parolari, A.J.; Department of Civil, United States; email: anthony.parolari@marquette.edu	2019	7	11	1220	1231		10.1029/2019EF001185			Scopus
Abebe Y.A., Ghorbani A., Nikolic I., Vojinovic Z., Sanchez A.	Flood risk management in Sint Maarten – A coupled agent-based and flood modelling method	Journal of Environmental Management	Agent-based modelling; Flood risk management; Sint maarten; Small island development states; Socio-hydrology	Disaster risk reduction is a major concern of small island developing states. Measures to reduce risk should not only be based on the magnitude of physical hazard, but also on the exposure and vulnerability of communities. In this article, we examine flood risk management policies in the Caribbean island of Sint Maarten using coupled agent-based and flood models. The agent-based model is used to …	Abebe, Y.A.; Environmental Engineering and Water Technology Department, Westvest 7, DA, Netherlands; email: y.abebe@un-ihe.org	2019	248				109317	10.1016/j.jenvman.2019.109317			Scopus
Rusca M., Di Baldassarre G.	Interdisciplinary critical geographies of water: Capturing the mutual shaping of society and hydrological flows	Water (Switzerland)	Critical geography; Hydrosocial cycle; Interdisciplinary studies; Sociohydrology; Socionatures	In light of recent calls for an increased commitment to interdisciplinary endeavors, this paper reflects on the implications of a critical geography of water that crosses social and natural sciences. Questions on how to best research the relationship between water and society have been raised both in the field of critical geographies of water and sociohydrology. Yet, there has been little crossov…	Rusca, M.; Department of Earth Sciences, Sweden; email: maria.rusca@geo.uu.se	2019	11	10			1973	10.3390/w11101973			Scopus
Perello-Moragues A., Noriega P., Poch M.	Modelling contingent technology adoption in farming irrigation communities	JASSS	Agent-Based Modeling; Innovation Diffusion; Irrigation Agriculture; Policy-Making; Socio-Hydrology	Of all the uses ofwater, agriculture is the one that requires the greatest proportion of resourcesworldwide. Consequently, it is a salient subject for environmental policy-making, and adoption of modern irrigation systems is a key means to improve water use efficiency. In this paper we present an agent-based model of the adoption process — known as “modernisation" — of a community constituted by …	Perello-Moragues, A.Spain; email: antonio.perello@fcc.es	2019	22	4			1	10.18564/jasss.4100			Scopus
Hou B., Yang R., Zhou Y., Xiao W., Wang J., Zhao Y., Zhan X.	Evolution mechanisms and fundamental equations of social water cycle fluxes	Hydrology Research	Evolution mechanisms; Social water cycle fluxes; Socio-hydrology; Water demand; Water use	The rise of socio-hydrology, addressing the interactions between human and water systems, is regarded as an innovative perspective to researches achieving the sustainable use of water resources. Revealing the social water fluxes, in terms of magnitude, structure, and variations under changing environment, could advance the understanding of water cycling under the dual driving forces: natural and …	Wang, J.; State Key Laboratory of Simulation and Regulation of Water Cycle in River Basin, A-1 Fuxing Road, China; email: jhwangiwhr@126.com	2019	50	5	1344	1358		10.2166/nh.2019.115			Scopus
Abadie L.M., Markandya A., Neumann M.B.	Accounting for economic factors in socio-hydrology: Optimization under uncertainty and climate change	Water (Switzerland)	Extreme events; Generalized extreme value distribution; Non-stationarity; Optimization under uncertainty; River flooding	This paper reframes the socio-hydrology analysis as an optimization problem. To achieve this, we first develop a valuation scheme to estimate net benefits of development in a flood plain, consisting of benefits obtained from land and housing, less the costs of flood management and flood damage. Then we look for an optimal safety factor for the levee heightening strategy within the 'Technosociety'…	Markandya, A.; Basque Centre for Climate Change BC3, Sede Building 1, 1st floor, Spain; email: anil.markandya@bc3research.org	2019	11	10			2073	10.3390/w11102073			Scopus
Pouladi P., Afshar A., Afshar M.H., Molajou A., Farahmand H.	Agent-based socio-hydrological modeling for restoration of Urmia Lake: Application of theory of planned behavior	Journal of Hydrology	Agent-based model (ABM); Decision-making process; Socio-hydrology; Theory of planned behavior (TPB); Urmia Lake	This study proposes a novel socio-hydrological modeling framework for assessing the performance of complex water resources systems. It employs and integrates agent-based modeling (ABM) and the theory of planned behavior (TPB) into the socio-hydrological modeling framework to account for agents’ behaviors. Due to farmers’ major role in anthropogenic droughts, this paper mainly focuses on farmers’ …	Afshar, A.; School of Civil Eng., Iran; email: a_afshar@iust.ac.ir	2019	576		736	748		10.1016/j.jhydrol.2019.06.080			Scopus
Owen G., Abrams A., Carden K., Harrison S., Selala C., Verster B.	Exploring the socio-hydrological assessment of two small municipalities in the Western Cape	Water Wheel		[No abstract available]		2019	18	5	34	36					Scopus
Garcia M., Koebele E., Deslatte A., Ernst K., Manago K.F., Treuer G.	Towards urban water sustainability: Analyzing management transitions in Miami, Las Vegas, and Los Angeles	Global Environmental Change	Socio-hydrology; Sustainability; Transition; Urban; Water management	As climate change challenges the sustainability of existing water supplies, many cities must transition toward more sustainable water management practices to meet demand. However, scholarly knowledge of the factors that drive such transitions is lacking, in part due to the dearth of comparative analyses in the existing transitions literature. This study seeks to identify common factors associated…	Garcia, M.; School of Sustainable Engineering and the Built Environment, 660 South College Ave, United States; email: M.Garcia@asu.edu	2019	58				101967	10.1016/j.gloenvcha.2019.101967			Scopus
Castilla-Rho J.C., Rojas R., Andersen M.S., Holley C., Mariethoz G.	Sustainable groundwater management: How long and what will it take?	Global Environmental Change	Agent-based modelling; Compliance; Cultural values; Enforcement; Regulation; Social norms; Socio-hydrology; World values survey	Groundwater depletion is arguably one of humanity's greatest sustainability challenges of the 21st century. With Sustainable Development Goals only a decade away, water authorities around the world are in the urgent need for concrete and targeted measures to ensure that communities adhere to groundwater management policies as rapidly and as effectively as possible. In this paper, we combine compu…	Castilla-Rho, J.C.; School of Information, 15 Broadway, Australia; email: juan.castilla@uts.edu.au	2019	58				101972	10.1016/j.gloenvcha.2019.101972			Scopus
Maghsood F.F., Moradi H., Berndtsson R., Panahi M., Daneshi A., Hashemi H., Bavani A.R.M.	Social acceptability of flood management strategies under climate change using contingent valuation method (CVM)	Sustainability (Switzerland)	Analytical Network Process; Contingent valuation method; Flood management; Social acceptability; WTP	Floods are natural hazards with serious impact on many aspects of human life. The Intergovernmental Panel on Climate Change (IPCC) reported that climate change already has significant impact on magnitude and frequency of flood events worldwide. Thus, it is suggested to adopt strategies to manage damage impacts of climate change. For this, involving the local community in the decision-making proce…	Moradi, H.; Department ofWatershed Management Engineering, Iran; email: hrmoradi@modares.ac.ir	2019	11	18			5053	10.3390/su11185053			Scopus
Jackowski N., de Ostos R.	Chromatic Compositions: Design Dissonance and the Aesthetic of Fusion	Architectural Design	A Centre for Socio-Hydrology; Al Di Meola; Allan Holdsworth; Architectural Association; Bartlett School of Architecture; Brazilian Amazon; Brazilian Embassy; Cambodia; Cameron Overy; chromatic scales; diatonic scales; Ectoplasmatic Library; India; John McLaughlin; Lebbeus Woods; London; maloca; NaJa & deOstos; PHANTOMS; Pregnant Island project; Raz Keltsh; Salman Rushdie; Shadow Theatre Archive p…	The approach to beauty of London-based experimental architectural studio NaJa & deOstos is to explore traditional cultures and technological digital environments. Co-founders Ricardo de Ostos and Nannette Jackowski, who also lead Intermediate Unit 3 at the Architectural Association School of Architecture, here discuss how architectural language and its representation both reference and challenge …		2019	89	5	52	57		10.1002/ad.2479			Scopus
Di Baldassarre G., Sivapalan M., Rusca M., Cudennec C., Garcia M., Kreibich H., Konar M., Mondino E., Mård J., Pande S., Sanderson M.R., Tian F., Viglione A., Wei J., Wei Y., Yu D.J., Srinivasan V., Blöschl G.	Sociohydrology: Scientific Challenges in Addressing the Sustainable Development Goals	Water Resources Research	legacy effects; precautionary principle; sociohydrology; Sustainable Development Goals; water crises	The Sustainable Development Goals (SDGs) of the United Nations Agenda 2030 represent an ambitious blueprint to reduce inequalities globally and achieve a sustainable future for all mankind. Meeting the SDGs for water requires an integrated approach to managing and allocating water resources, by involving all actors and stakeholders, and considering how water resources link different sectors of so…	Di Baldassarre, G.; Department of Earth Sciences, Sweden; email: giuliano.dibaldassarre@geo.uu.se	2019	55	8	6327	6355		10.1029/2018WR023901			Scopus
Di Pelino S., Schuster-Wallace C., Hynds P.D., Dickson-Anderson S.E., Majury A.	A coupled-systems framework for reducing health risks associated with private drinking water wells	Canadian Water Resources Journal		Privately owned wells are vulnerable to contamination and as such pose a significant public health threat to those who rely on them for domestic water use. While a myriad of studies have sought to individually examine well water quality or the stewardship behaviours among well owners and users, few have effectively explored the intersection between private groundwater contamination and human beha…	Majury, A.; Public Health Ontario, 181 Barrie Street, Canada; email: anna.majury@oahpp.ca	2019	44	3	280	290		10.1080/07011784.2019.1581663			Scopus
Sohns A., Ford J., Robinson B.E., Adamowski J.	What conditions are associated with household water vulnerability in the Arctic?	Environmental Science and Policy	Arctic; Drinking water; Socio-hydrology; Vulnerability	Increasing pressure on water resources from demographic shifts, climate change, and development patterns is affecting water access and water availability in Arctic households. There is an urgent need to improve understanding of the factors that contribute to Arctic household water vulnerability. This paper examines the key conditions or combinations of conditions associated with water access and …	Sohns, A.; Department of Geography, 805 Sherbrooke St W, Canada; email: antonia.sohns@mail.mcgill.ca	2019	97		95	105		10.1016/j.envsci.2019.04.008			Scopus
Caprario J., Finotti A.R.	Socio-technological tool for mapping susceptibility to urban flooding	Journal of Hydrology	Flooding mapping; Flooding susceptibility; Social-hydrological tool; Socio-technological tool; Urban drainage	The intensification of flooding in urban areas and the management of susceptibility areas has become a global issue and has been the subject of several studies in recent decades. The integration of alternative approaches, such as socio-hydrological and socio-technological sciences, has gained prominence in urban space planning and development. The mapping of environmental susceptibility represent…	Caprario, J.; LAUTEC – Urban Stormwater and Compensatory Techniques Laboratory, Delfino Conti Street, s/n – Trindade, Brazil; email: jakcemara@hotmail.com	2019	574		1152	1163		10.1016/j.jhydrol.2019.05.005			Scopus
Godinez-Madrigal J., Van Cauwenbergh N., van der Zaag P.	Production of competing water knowledge in the face of water crises: Revisiting the IWRM success story of the Lerma-Chapala Basin, Mexico	Geoforum	Epistemic controversies; IWRM; Public participation; Water conflicts; Water knowledge; Water scarcity; Wicked problems	Integrated Water Resources Management (IWRM) is an approach that aims to change conventional water management. International agencies and organizations have promoted IWRM across the globe. The Lerma-Chapala Basin in Mexico is an archetypal case study on basin closure, where IWRM principles were said to have been applied in the early 2000s to help solve a serious water crisis. This paper analyses …	Godinez-Madrigal, J.; Department of Integrated Water Systems and Governance, Netherlands; email: j.godinezmadrigal@gmail.com	2019	103		3	15		10.1016/j.geoforum.2019.02.002			Scopus
Baeza A., Bojorquez-Tapia L.A., Janssen M.A., Eakin H.	Operationalizing the feedback between institutional decision-making, socio-political infrastructure, and environmental risk in urban vulnerability analysis	Journal of Environmental Management	Adaptation; Agent-based model; Climate change; Flooding; Governance; Multi-criteria; Multi-scale; Protests; Water scarcity	Urban adaptation to climate change is likely to emerge from the responses of residents, authorities, and infrastructure providers to the impact of flooding, water scarcity, and other climate-related hazards. These responses are, in part, modulated by political relationships under cultural norms that dominate the institutional and collective decisions of public and private actors. The legacy of th…	Baeza, A.; Julie Ann Wrigley Global Institute of Sustainability, United States; email: abaezaca@asu.edu	2019	241		407	417		10.1016/j.jenvman.2019.03.138			Scopus
Hynds P.D., Nasr A.E., O'Dwyer J.	Evaluation of hydrometric network efficacy and user requirements in the Republic of Ireland via expert opinion and statistical analysis	Journal of Hydrology	Cross-sectional survey; Hydrometric measurement; Network design; Optimisation	Decreased funding and shifting governmental priorities have resulted in a contraction of hydrometric measurement in many regions over the past two decades. Moreover, concerns exist with respect to appropriate data usage and (transboundary) exchange, in addition to the compatibility and extent of existing hydrometric datasets. These issues are undoubtedly magnified due to enhanced data demands and…	Hynds, P.D.; Environmental Sustainability and Health Institute (ESHI), Ireland; email: hyndsp@tcd.ie	2019	574		851	861		10.1016/j.jhydrol.2019.04.086			Scopus
Wu X.D., Guo J.L., Li C.H., Shao L., Han M.Y., Chen G.Q.	Global socio-hydrology: An overview of virtual water use by the world economy from source of exploitation to sink of final consumption	Journal of Hydrology	Global socio-hydrology; Global supply chain; Trade imbalance; Virtual water; World economy	To reflect a key aspect of global socio-hydrology, this paper explores global virtual water use from source of exploitation to sink of final consumption via interregional trades within the world economy as reflected by world input-output database for 2014. An embodiment accounting model is developed, which takes full account of virtual water feedbacks related to primary inputs. Global total trade…	Chen, G.Q.; Laboratory of Systems Ecology and Sustainability Science, China; email: gqchen@pku.edu.cn	2019	573		794	810		10.1016/j.jhydrol.2019.03.080			Scopus
Ogilvie A., Riaux J., Massuel S., Mulligan M., Belaud G., Le Goulven P., Calvez R.	Socio-hydrological drivers of agricultural water use in small reservoirs	Agricultural Water Management	Remote sensing; Small reservoirs; Socio-hydrology; Tunisia; Water harvesting	Millions of small reservoirs built across semi-arid areas present a potential to support agricultural livelihoods of rural smallholders. The scale and geographical dispersion of these multiple lakes restrict the understanding of these coupled human-water systems and the identification of adequate strategies to support riparian farmers. This research developed a multi-scalar interdisciplinary appr…	Ogilvie, A.; G-EAU, France; email: andrew.ogilvie@ird.fr	2019	218		17	29		10.1016/j.agwat.2019.03.001			Scopus
Nüsser M., Dame J., Kraus B., Baghel R., Schmidt S.	Socio-hydrology of “artificial glaciers” in Ladakh, India: assessing adaptive strategies in a changing cryosphere	Regional Environmental Change	Climate change adaptation; Cold-arid region; Ice reservoirs; Irrigated agriculture; Socio-hydrology; Water conservation	The consequences of even small glacier decrease and changes of seasonal snow cover are critical for the functioning of meltwater-dependent mountain agriculture. In order to deal with recurrent water scarcity, different types of ice reservoirs, commonly called “artificial glaciers,” have been introduced in Ladakh and promoted as appropriate adaptive strategies to cope with changes in the cryospher…	Nüsser, M.; Department of Geography, Germany; email: marcus.nuesser@uni-heidelberg.de	2019	19	5	1327	1337		10.1007/s10113-018-1372-0			Scopus
Nüsser M., Dame J., Parveen S., Kraus B., Baghel R., Schmidt S.	Cryosphere-fed irrigation networks in the northwestern himalaya: Precarious livelihoods and adaptation strategies under the impact of climate change	Mountain Research and Development	Adaptation strategies.; Cryosphere dynamics.; Himalaya.; India.; Irrigation networks.; Pakistan; Sociohydrology.	Irrigated agriculture is crucial for the livelihood security of mountain communities in the northwestern part of the Himalayan arc and adjoining regions of the Karakoram Hindu Kush and Trans-Himalaya. Using meltwater from glaciers, snow, and permafrost, mountain dwellers have developed sophisticated techniques to cope with recurrent water scarcity caused by glacier retreat, glacier thinning, and …	Nüsser, M.; Department of Geography, Voßstraße 2/4130, Germany; email: marcus.nuesser@uni-heidelberg.de	2019	39	2	R1	R11		10.1659/MRD-JOURNAL-D-18-00072.1			Scopus
Tian F., Lu Y., Hu H., Kinzelbach W., Sivapalan M.	Dynamics and driving mechanisms of asymmetric human water consumption during alternating wet and dry periods	Hydrological Sciences Journal	emergent dynamics; human water consumption; hydrological variability; prospect theory; socio-hydrology; threshold uncertainty	Increases in human water consumption (HWC) and consequent degradation of the ecological environment are common in arid regions. Understanding the mechanisms behind these processes is important for sustainable development. Analyses of changes in HWC between alternating wet and dry periods are carried out in four arid inland basins in Central Asia and China (Syr Darya, Tarim, Heihe and Shulehe rive…	Tian, F.; Department of Hydraulic Engineering, China; email: tianfq@tsinghua.edu.cn	2019	64	5	507	524		10.1080/02626667.2019.1588972			Scopus
Kuil L., Carr G., Prskawetz A., Salinas J.L., Viglione A., Blöschl G.	Learning from the Ancient Maya: Exploring the Impact of Drought on Population Dynamics	Ecological Economics	Climate change; Drought; Population-resource model; Socio-hydrology; Virtual water; Vulnerability	Understanding the relationship between drought and population dynamics is increasingly important, particularly in areas where high population growth corresponds with increasing drought risk due to climate change. We examine the relationship between drought events and population dynamics using a stylized hydrology-demography model that has been calibrated to simulate plausible feedbacks for the po…	Kuil, L.; Centre for Water Resource Systems, Karlsplatz 13/222, Austria; email: kuil@waterresources.at	2019	157		1	16		10.1016/j.ecolecon.2018.10.018			Scopus
Zhang L.	Comment on “Exploring the Influence of Smallholders' Perceptions Regarding Water Availability on Crop Choice and Water Allocation Through Socio-Hydrological Modeling” by Kuil et al. [Water Resource Research, 54, 2580–2604]	Water Resources Research	bounded rationality; crop choice; hydrology; irrigation water; social-hydrological model; water allocation	A paper has recently been published in Water Resources Research, which explored the influence of smallholder's perceptions regarding water availability on crop choice and water allocation through social-hydrological modeling. The present paper attempts to discuss and comment on that paper. The authors have developed a social-hydrological model, behind which some assumptions of the hydrological as…	Zhang, L.; Key Laboratory of Remote Sensing of Gansu Province, China; email: zhanglingky@lzb.ac.cn	2019	55	3	2532	2535		10.1029/2018WR023684			Scopus
Konar M., Garcia M., Sanderson M.R., Yu D.J., Sivapalan M.	Expanding the Scope and Foundation of Sociohydrology as the Science of Coupled Human-Water Systems	Water Resources Research	droughts & floods; institutions; sociohydrology; sustainability; water management; water metabolism	Sociohydrology was launched as the science dealing with feedbacks between coupled human and water systems. Much of the early work in sociohydrology involved studies in spatially isolated domains (e.g., river basins) dealing with phenomena that involved emergent patterns in the time domain, with a focus on formulating and testing hypotheses about how they arise. The papers collected in this Specia…	Konar, M.; Department of Civil and Environmental Engineering, United States; email: mkonar@illinois.edu	2019						10.1029/2018WR024088			Scopus
Li B., Sivapalan M., Xu X.	An Urban Sociohydrologic Model for Exploration of Beijing's Water Sustainability Challenges and Solution Spaces	Water Resources Research	modeling; sociohydrology; urban hydrology; water sustainability	The mismatch between water demand and water availability in many megacities poses vexing water management challenges. Managers are forced to take remedial efforts to address these challenges, often with a heavy focus on infrastructure solutions such as building reservoirs or interbasin transfers to meet demand, which may in fact exacerbate the problem through unintended consequences that arise fr…	Li, B.; College of Water Sciences, China; email: libin@mail.bnu.edu.cn	2019	55	7	5918	5940		10.1029/2018WR023816			Scopus
Barendrecht M.H., Viglione A., Kreibich H., Merz B., Vorogushyn S., Blöschl G.	The Value of Empirical Data for Estimating the Parameters of a Sociohydrological Flood Risk Model	Water Resources Research		In this paper, empirical data are used to estimate the parameters of a sociohydrological flood risk model. The proposed model, which describes the interactions between floods, settlement density, awareness, preparedness, and flood loss, is based on the literature. Data for the case study of Dresden, Germany, over a period of 200 years, are used to estimate the model parameters through Bayesian in…	Barendrecht, M.H.; Centre for Water Resource Systems, Austria; email: barendrecht@hydro.tuwien.ac.at	2019						10.1029/2018WR024128			Scopus
Abebe Y.A., Ghorbani A., Nikolic I., Vojinovic Z., Sanchez A.	A coupled flood-agent-institution modelling (CLAIM) framework for urban flood risk management	Environmental Modelling and Software	Agent-based modelling; Coupled human-flood systems; Flood risk management; Institutions; Socio-hydrology; Urban flood modelling	In this paper, we describe a modelling framework that allows the integration of human and physical components of flood risk. Within this framework, flood risk management is conceptualized as a coupled human-flood system. The human subsystem includes individuals and their behaviour and institutions that shape human-flood interaction. The framework presents a dynamic integration between agent-based…	Abebe, Y.A.; Environmental Engineering and Water Technology Department, Westvest 7, Netherlands; email: y.abebe@un-ihe.org	2019	111		483	492		10.1016/j.envsoft.2018.10.015			Scopus
Basel, B; Quiroz, NH; Herrera, RV; Alonso, CS; Hoogesteger, J	Bee mietii rak rkabni nis (The people know how to seed water): A Zapotec experience in adapting to water scarcity and drought	CLIMATE AND DEVELOPMENT	Sociohydrology; community-based adaptation; collective action; managed aquifer recharge; indigenous knowledge; water security; Mexico; climate change; drought	We are facing a global water crisis exacerbated by hydro-climatic extremes related to climate change. Water scarcity is expected to increasingly affect indigenous and marginalized populations. Supporting the sovereignty of indigenous and rural populations to create water secure futures through place-based knowledge, local management, and Community-based Adaptation (CBA) measures may help tackle t…	brittbasel@ecothropic.com	2020						10.1080/17565529.2020.1855100	Development Studies; Environmental Studies	Development Studies; Environmental Sciences & Ecology	WoS
Yu, DJ; Chang, H; Davis, TT; Hillis, V; Marston, LT; Oh, WS; Sivapalan, M; Waring, TM	Socio-hydrology: an interplay of design and self-organization in a multilevel world	ECOLOGY AND SOCIETY	coupled human-water system; cultural evolution; cultural multilevel selection; robustness; robustness-fragility trade-offs; socio-hydrology; the levee effect	The emerging field of socio-hydrology is a special case of social-ecological systems research that focuses on coupled human-water systems, exploring how the hydrologic cycle and human cultural traits coevolve and how such coevolutions lead to phenomena of relevance to water security and sustainability. As such, most problems tackled by socio-hydrology involve some aspects of engineering design, s…		2020	25	4			22	10.5751/ES-11887-250422	Ecology; Environmental Studies	Environmental Sciences & Ecology	WoS
Carr, G; Barendrecht, MH; Debevec, L; Kuil, L; Bloschl, G	People and water: understanding integrated systems needs integrated approaches	JOURNAL OF WATER SUPPLY RESEARCH AND TECHNOLOGY-AQUA	interdisciplinary; socio-hydrology; water management	As we rapidly modify the environment around us, researchers have a critical role to play in raising our understanding of the interactions between people and the world in which they live. Knowledge and understanding of these interactions are essential for evidence based decision-making on resource use and risk management. In this paper, we explore three research case studies that illustrate co-evo…	carr@waterresources.at	2020	69	8	819	832		10.2166/aqua.2020.055	Engineering, Civil; Water Resources	Engineering; Water Resources	WoS
Lopez-Alvarez, B; Urbano-Pena, MA; Moran-Ramirez, J; Ramos-Leal, JA; Tuxpan-Vargas, J	Estimation of the environment component of the Water Poverty Index via remote sensing in semi-arid zones	HYDROLOGICAL SCIENCES JOURNAL-JOURNAL DES SCIENCES HYDROLOGIQUES	water poverty index environment; resource; soil adjusted vegetation index (SAVI); normalized difference vegetation index (NDVI); foliar area index (LAI); CIgreen; socio-hydrology	Groundwater has become an alternative water supply for various sectors of the population and the economy, and its extraction is increasing worldwide. The water poverty index (WPI) is a holistic tool that enables the establishment of links between poverty, social marginalization, environmental integrity, water availability and health. The index includes five components - water resources, access, c…	briseida.lopez@colsan.edu.mx	2020	65	16	2647	2657		10.1080/02626667.2020.1839081	Water Resources	Water Resources	WoS
Garcia, M; Ridolfi, E; Di Baldassarre, G	The interplay between reservoir storage and operating rules under evolving conditions	JOURNAL OF HYDROLOGY	Drought; Reservoir; Robustness; Fragility; System dynamics; Sociohydrology	Reservoir storage helps manage hydrological variability, increasing predictability and productivity of water supply. However, there are inevitable tradeoffs, with control of high frequency variability coming at the expense of robustness to low frequency variability. Tightly controlling variability can reduce incentives to maintain adaptive capacity needed during events that exceed design threshol…	M.Garcia@asu.edu	2020	590				125270	10.1016/j.jhydrol.2020.125270	Engineering, Civil; Geosciences, Multidisciplinary; Water Resources	Engineering; Geology; Water Resources	WoS
Li, B; Sivapalan, M	Long-Term Coevolution of an Urban Human-Water System Under Climate Change: Critical Role of Human Adaptive Actions	WATER RESOURCES RESEARCH	sociohydrology; water supply; climate change; urban hydrology; interbasin transfer; water management	The impacts of climate change and human activities are challenging water sustainability in many cities around the world. Advanced understanding of the future long-term coevolution of coupled urban human-water systems is of considerable interest in this context. This study uses a previously developed sociohydrologic model to explore the coevolutionary trajectories of Beijing City's human-water sys…	libin@mail.bnu.edu.cn	2020	56	11			e2020WR027931	10.1029/2020WR027931	Environmental Sciences; Limnology; Water Resources	Environmental Sciences & Ecology; Marine & Freshwater Biology; Water Resources	WoS
Knighton, J; Buchanan, B; Guzman, C; Elliott, R; White, E; Rahm, B	Predicting flood insurance claims with hydrologic and socioeconomic demographics via machine learning: Exploring the roles of topography, minority populations, and political dissimilarity	JOURNAL OF ENVIRONMENTAL MANAGEMENT	Flooding insurance claims; Random forest; Vulnerability; Socio-hydrology; Flooding; FEMA; LIS-FLOOD	Current research on flooding risk often focuses on understanding hazards, de-emphasizing the complex pathways of exposure and vulnerability. We investigated the use of both hydrologic and social demographic data for flood exposure mapping with Random Forest (RF) regression and classification algorithms trained to predict both parcel- and tract-level flood insurance claims within New York State, U…	jknighton@sesync.org; bb386@cornell.edu; cdguzman@umass.edu; R.Elliott1@lse.ac.uk; Eric.White@la.gov; bgr4@cornell.edu	2020	272				111051	10.1016/j.jenvman.2020.111051	Environmental Sciences	Environmental Sciences & Ecology	WoS
Sawada, Y; Hanazaki, R	Socio-hydrological data assimilation: analyzing human-flood interactions by model-data integration	HYDROLOGY AND EARTH SYSTEM SCIENCES		In socio-hydrology, human-water interactions are simulated by mathematical models. Although the integration of these socio-hydrological models and observation data is necessary for improving the understanding of human-water interactions, the methodological development of the model- data integration in socio-hydrology is in its infancy. Here we propose applying sequential data assimilation, which …	yohei.sawada@sogo.t.u-tokyo.ac.jp	2020	24	10	4777	4791		10.5194/hess-24-4777-2020	Geosciences, Multidisciplinary; Water Resources	Geology; Water Resources	WoS
Vicario, SA; Mazzoleni, M; Bhamidipati, S; Gharesifard, M; Ridolfi, E; Pandolfo, C; Alfonso, L	Unravelling the influence of human behaviour on reducing casualties during flood evacuation	HYDROLOGICAL SCIENCES JOURNAL-JOURNAL DES SCIENCES HYDROLOGIQUES	flood evacuation; human evacuation behaviour; agent-based modelling; flood modelling; socio-hydrology; unsolved problems in hydrology (UPH); UPH #21	Floods are the natural hazards that are causing the most deaths worldwide. Flood early warning systems are one of the most cost-efficient methods to reduce death rates, triggering decisions about the evacuation of exposed population. Although previous studies have investigated the effect of human behaviours on evacuation processes, studies analysing a combination of behaviours, flood onset and wa…	saralonsovicario@gmail.com	2020	65	14	2359	2375		10.1080/02626667.2020.1810254	Water Resources	Water Resources	WoS
Riaux, J; Ogilvie, A; Jenhaoui, Z	More than just water! Hydraulic materiality and the process of resource making: A sociohydrological reading of Tunisian hillside reservoirs	JOURNAL OF RURAL STUDIES	Water; Small reservoirs; Hydraulic locality; Resource making; Tunisia	Fulfilling both Water and soil conservation and Integrated rural development objectives, hillside reservoirs are very popular components of water and/or rural management strategies. In Central Tunisia, more than 800 reservoirs have been built since the 1950s. These have been the subject of an abundant literature by both social and physical scientists. However, this literature, which is highly seg…	jeanne.riaux@ird.fr; Andrew.ogilvie@ird.fr; zakia.jenhaoui@ird.fr	2020	79		125	135		10.1016/j.jrurstud.2020.08.041	Geography; Regional & Urban Planning	Geography; Public Administration	WoS
Wang, GP; Hu, ZY; Liu, Y; Zhang, GM; Liu, JF; Lyu, YL; Gu, Y; Huang, XC; Zhang, QY; Tong, ZZ; Hong, C; Liu, LY	Impact of Expansion Pattern of Built-Up Land in Floodplains on Flood Vulnerability: A Case Study in the North China Plain Area	REMOTE SENSING	built-up land in floodplains; impact; flood vulnerability; GIS-based landscape analysis; adaptation strategy; socio-hydrology	Built-up land in floodplains (BLF) is a driver and a disaster-bearing body of flood risk from a socio-hydrological perspective. The relationship between BLF growth and flood vulnerability is the key to understanding and managing flood risk. However, previous studies have focused more on the relationship between BLF growth and flood exposure, ignoring flood vulnerability. We examined the BLF expan…	201831051091@mail.bnu.edu.cn; 201831051090@mail.bnu.edu.cn; 201731480037@mail.bnu.edu.cn; zgm@bnu.edu.cn; liujifu@bnu.edu.cn; lyl@bnu.edu.cn; 201821051165@mail.bnu.edu.cn; 201931051090@mail.bnu.edu.cn; 201921051163@mail.bnu.edu.cn; 201821051176@mail.bnu.edu.cn; 201821051166@mail.bnu.edu.cn; lyliu@bnu.edu.cn	2020	12	19			3172	10.3390/rs12193172	Environmental Sciences; Remote Sensing	Environmental Sciences & Ecology; Remote Sensing	WoS
Herrera-Franco, G; Carrion-Mero, P; Aguilar-Aguilar, M; Morante-Carballo, F; Jaya-Montalvo, M; Morillo-Balsera, MC	Groundwater Resilience Assessment in a Communal Coastal Aquifer System. The Case of Manglaralto in Santa Elena, Ecuador	SUSTAINABILITY	resilience assessment; groundwater; coastal aquifer; rural community; Sustainable Development Goals and indicators	Resilience has several meanings, among them the ability to overcome difficulty and return to the state of providing service, even if the initial conditions change. Assessing resilience in an ecosystem, or any system, requires a concise methodology with standard variables and parameters. The current challenge presented by coastal areas is focused on overcoming problems related to the water supply …	grisherrera@upse.edu.ec; pcarrion@espol.edu.ec; maesagui@espol.edu.ec; fmorante@espol.edu.ec; mjaya@espol.edu.ec; mariadelcarmen.morillo@upm.es	2020	12	19			8290	10.3390/su12198290	Green & Sustainable Science & Technology; Environmental Sciences; Environmental Studies	Science & Technology - Other Topics; Environmental Sciences & Ecology	WoS
Koutiva, I; Lykou, A; Pantazis, C; Makropoulos, C	Investigating Decision Mechanisms of Statutory Stakeholders in Flood Risk Strategy Formation: A Computational Experiments Approach	WATER	decision making support; flood risk management; agent based modelling; socio-hydrology	Cities at risk of extreme hydro-meteorological events need to be prepared to decrease the extent of the impacts. However, sometimes, authorities only react to catastrophes failing to proactively prepare against extremes. This can be a result of both absent structural protection measures and problematic governance. While for the first, models exist that can simulate the effect, the effect of the l…	ikoutiva@mail.ntua.gr; alykou@central.ntua.gr; xpanta@gmail.com; cmakro@mail.ntua.gr	2020	12	10			2716	10.3390/w12102716	Environmental Sciences; Water Resources	Environmental Sciences & Ecology; Water Resources	WoS
Owens, DC; Petitt, DN; Lally, D; Forbes, CT	Cultivating Water Literacy in STEM Education: Undergraduates' Socio-Scientific Reasoning about Socio-Hydrologic Issues	WATER	socio-hydrological issues; socio-scientific reasoning; functional scientific literacy	Water-literate individuals effectively reason about the hydrologic concepts that underlie socio-hydrological issues (SHI), but functional water literacy also requires concomitant reasoning about the societal, non-hydrological aspects of SHI. Therefore, this study explored the potential for the socio-scientific reasoning construct (SSR), which includes consideration of the complexity of issues, th…	dcowens@georgiasouthern.edu; dpetitt@uncc.edu; dlally@huskers.unl.edu; cforbes3@unl.edu	2020	12	10			2857	10.3390/w12102857	Environmental Sciences; Water Resources	Environmental Sciences & Ecology; Water Resources	WoS
Bano, R; Khiadani, M; Burian, S	Socio-Hydrological Modelling to Assess Reliability of an Urban Water System under Formal-Informal Supply Dynamics	WATER	formal and informal water supply systems; socio-hydrological modelling; system dynamics; consumer behaviour; tariff recovery; financial sustainability	Increasing water scarcity in developing world cities combined with poor performance of water supply systems has led to an increasing reliance on informal water supply systems. Although the availability of informal supply provides a coping mechanism that enables water consumers to be resilient to failures in water supply, the longer-term effects on formal water supply systems (FWSS) are uncertain,…	r.bano@ecu.edu.au; m.khiadani@ecu.edu.au; steve.burian@utah.edu	2020	12	10			2795	10.3390/w12102795	Environmental Sciences; Water Resources	Environmental Sciences & Ecology; Water Resources	WoS
Boluwade, A	Spatial-Temporal Assessment of Satellite-Based Rainfall Estimates in Different Precipitation Regimes in Water-Scarce and Data-Sparse Regions	ATMOSPHERE	satellite precipitation; rainfall pattern; hydrology; flood resilience; arid country	Accurate precipitation measurement is very important for socio-hydrological resilience in the face of frequent extreme weather events such as cyclones. This study evaluates the performance of two satellite products: the Tropical Rainfall Measuring Mission (TRMM 3B43V7) Multi-satellite Precipitation Analysis (TMPA, hereafter: TRMM) and the Integrated Multi-satellite Retrievals for GPM (IMERG, Fina…	alaba@squ.edu.om	2020	11	9			901	10.3390/atmos11090901	Environmental Sciences; Meteorology & Atmospheric Sciences	Environmental Sciences & Ecology; Meteorology & Atmospheric Sciences	WoS
Savenije, HHG; van der Zaag, P	Water Value Flows Upstream	WATER	valuation; integrated assessment; water economics; water resources management	Arjen Hoekstra postulated in 2001 that the value of water accumulates in an upstream direction: water value flows upstream. The ultimate source of this value is the rain. This original idea he used to develop the water value-flow concept. This article shows that the water value-flow concept has much to offer in terms of contemporary challenges. It is fully consistent with the Five Bellagio Princi…	h.h.g.savenije@tudelft.nl; p.vanderzaag@un-ihe.org	2020	12	9			2642	10.3390/w12092642	Environmental Sciences; Water Resources	Environmental Sciences & Ecology; Water Resources	WoS
Aghaie, V; Alizadeh, H; Afshar, A	Emergence of social norms in the cap-and-trade policy: An agent-based groundwater market	JOURNAL OF HYDROLOGY	Groundwater market; Cap-and-trade policy; Agent-based modeling; Social norms; Collective action; Socio-hydrology	Cap-and-trade policy is generally considered an effective instrument in groundwater markets since it can facilitate environmental protection and sustainable groundwater use. While this policy is implemented in several aquifers all over the world, there is a limited understanding of its social impacts, like how compliance and noncompliance behaviors may emerge. This study presents an agent-based g…	aghaie_vahid@civileng.iust.ac.ir; alizadeh@iust.ac.ir; a_afshar@iust.ac.ir	2020	588				125057	10.1016/j.jhydrol.2020.125057	Engineering, Civil; Geosciences, Multidisciplinary; Water Resources	Engineering; Geology; Water Resources	WoS
Enteshari, S; Safavi, HR; van der Zaag, P	Simulating the interactions between the water and the socio-economic system in a stressed endorheic basin	HYDROLOGICAL SCIENCES JOURNAL-JOURNAL DES SCIENCES HYDROLOGIQUES	Zayandehrud; Iran; socio-hydrology; IWRM; scenario analysis	The endorheic basin of Zayandehrud in Iran suffers from environmental problems, social tensions, and economic instability. Lack of understanding how the water system and the socio-economic system interact may explain these challenges. A system dynamics model, being a holistic simulation tool, was developed for the Zayandehrud basin and used to evaluate several policy scenarios. The indices of emp…	p.vanderzaag@un-ihe.org	2020	65	13	2159	2174		10.1080/02626667.2020.1802027	Water Resources	Water Resources	WoS
Mondino, E; Scolobig, A; Borga, M; Di Baldassarre, G	The Role of Experience and Different Sources of Knowledge in Shaping Flood Risk Awareness	WATER	flooding; natural hazards; risk awareness; sociohydrology	Understanding what makes people vulnerable to flooding is key in informing the risk management process. Non-structural measures, such as risk communication, can reduce vulnerability by improving flood risk awareness, but they require a deep understanding of which factors influence risk awareness, and how. We analysed and untangled the role of experience with, and knowledge of, floods by conductin…	elena.mondino@geo.uu.se; anna.scolobig@unige.ch; marco.borga@unipd.it; giuliano.dibaldassarre@geo.uu.se	2020	12	8			2130	10.3390/w12082130	Environmental Sciences; Water Resources	Environmental Sciences & Ecology; Water Resources	WoS
Roobavannan, M; Kandasamy, J; Pande, S; Vigneswaran, S; Sivapalan, M	Sustainability of agricultural basin development under uncertain future climate and economic conditions: A socio-hydrological analysis	ECOLOGICAL ECONOMICS	Socio-hydrology; Sustainable development; Values and preferences; Future projections; Safe operating space	A socio-hydrological model is used to forecast future conditions in a river basin arising from changes in climate and the economy in order to learn about macroeconomic conditions that would yield pathways for sustainable development and how they may be affected by changes in climate and the economy. The study uses a system dynamics model with endogenous social values and preferences and exogenous…	jaya.kandasamy@uts.edu.au	2020	174				106665	10.1016/j.ecolecon.2020.106665	Ecology; Economics; Environmental Sciences; Environmental Studies	Environmental Sciences & Ecology; Business & Economics	WoS
Madani, K; Shafiee-Jood, M	Socio-Hydrology: A New Understanding to Unite or a New Science to Divide?	WATER	socio-hydrology; hydro-sociology; human-water systems; human-nature systems; water resources systems; social-ecological systems; CHANS; SES; socio-hydrologic modeling; integrated water resources management; IWRM; water resources management; hydrology	The socio-hydrology community has been very successful in promoting the need for taking the human factor into account in the mainstream hydrology literature since 2012. However, the interest in studying and modeling human-water systems is not new and pre-existed the post-2012 socio-hydrology. So, it is critical to ask what socio-hydrology has been able to offer that would have been unachievable u…	kaveh.madani@yale.edu; shafiee2@illinois.edu	2020	12	7			1941	10.3390/w12071941	Environmental Sciences; Water Resources	Environmental Sciences & Ecology; Water Resources	WoS
Alegria, MEO; Schutze, N; Zipper, SC	A Serious Board Game to Analyze Socio-Ecological Dynamics towards Collaboration in Agriculture	SUSTAINABILITY	socio-hydrology; irrigation; serious games; decision-making parameters; agent-based modeling	Climate change exacerbates water scarcity and associated conflicts over water resources. To address said conflicts and achieve sustainable use of water resources in agriculture, further development of socio-ecological adaptations are required. In this study, we evaluate the ability of MAHIZ, a serious board game, to analyze socio-hydrological dynamics related to irrigated agriculture. Gameplay in…	maria_elena.orduna_alegria@tu-dresden.de; niels.schuetze@tu-dresden.de; samzipper@ku.edu	2020	12	13			5301	10.3390/su12135301	Green & Sustainable Science & Technology; Environmental Sciences; Environmental Studies	Science & Technology - Other Topics; Environmental Sciences & Ecology	WoS
Medeiros, P; Sivapalan, M	From hard-path to soft-path solutions: slow-fast dynamics of human adaptation to droughts in a water scarce environment	HYDROLOGICAL SCIENCES JOURNAL-JOURNAL DES SCIENCES HYDROLOGIQUES	Socio-hydrology; coupled human-water system; unanticipated feedbacks; drought; sustainability	Droughts have long impacted humans with adverse consequences, hindering the achievement of the United Nations Sustainable Development Goals. To reduce vulnerability, multiple ways of adaptation have been developed, most of which, historically, focused on hard-path implementation of infrastructure. However, since water consumption plays a major role in the supply-demand balance, soft-path solution…	phamedeiros@ifce.edu.br	2020	65	11	1803	1814		10.1080/02626667.2020.1770258	Water Resources	Water Resources	WoS
Mitra, S; Roy, AK; Tamang, L	Assessing the Status of Changing Channel Regimes of Balason and Mahananda River in the Sub-Himalayan West Bengal, India	EARTH SYSTEMS AND ENVIRONMENT	Anthropogenic intervention; Bed lowering; Channel narrowing; Landuse alteration; Sediment mining	Rapid infrastructural development, triggered by the economic policies implemented in 1991, subsequently modified the river channel planform of the Terai region of northern West Bengal, India, through perceptible channel fragmentation, excessive in-channel sediment mining and rampant landuse alterations of the floodplains. In this context, this study has attempted to assess the impacts of anthropo…	smitra423@gmail.com; asit.roy790@gmail.com; ltgeog@caluniv.ac.in	2020	4	2	409	425		10.1007/s41748-020-00160-y	Environmental Sciences; Geosciences, Multidisciplinary; Meteorology & Atmospheric Sciences	Environmental Sciences & Ecology; Geology; Meteorology & Atmospheric Sciences	WoS
Dziubanski, D; Franz, KJ; Gutowski, W	Linking economic and social factors to peak flows in an agricultural watershed using socio-hydrologic modeling	HYDROLOGY AND EARTH SYSTEM SCIENCES		Hydrologic modeling studies most often represent humans through predefined actions and fail to account for human responses under changing hydrologic conditions. By treating both human and hydrologic systems as coevolving, we build a socio-hydrological model that combines an agent-based model (ABM) with a semi-distributed hydrologic model. The curve number method is used to clearly illustrate the …	dave.dziubanski@gmail.com	2020	24	6	2873	2894		10.5194/hess-24-2873-2020	Geosciences, Multidisciplinary; Water Resources	Geology; Water Resources	WoS
Muller, J; Dame, J; Nusser, M	Urban Mountain Waterscapes: The Transformation of Hydro-Social Relations in the Trans-Himalayan Town Leh, Ladakh, India	WATER	Ladakh; urbanisation; water governance; urban transition; waterscapes; water infrastructure; hydromentalities; water citizenships; hydro-social relations	Socio-economic processes and climate change impact the socio-hydrology of many small towns in the Hindu Kush Himalaya (HKH), such as Leh in Ladakh. The rapidly urbanising town experienced a shift from agricultural livelihoods towards incomes mainly relying on the tourism sector. As results of this research show, the limited water resources essential to the everyday life of urban citizens have bec…	judith.mueller@uni-heidelberg.de; juliane.dame@uni-heidelberg.de; marcus.nuesser@uni-heidelberg.de	2020	12	6			1698	10.3390/w12061698	Environmental Sciences; Water Resources	Environmental Sciences & Ecology; Water Resources	WoS
Rijneveld, R; Marhaento, H	Stakeholders' contradicting perceptions on the effects of agroforestry and monocropping systems on water use	WATER PRACTICE AND TECHNOLOGY	agroforestry; Q methodology; sociohydrology; stakeholder perceptions; water use	The involvement of stakeholders in forest management decisions is crucial to the success of these programmes. Consequently, understanding stakeholders' perceptions is relevant for adequate management and development. In this study, the perceptions of key stakeholders are identified and compared concerning the effects of agroforestry and monocropping systems on water use in the farmlands of the Ge…	marhaento@ugm.ac.id	2020	15	2	365	373		10.2166/wpt.2020.024	Water Resources	Water Resources	WoS
Brelsford, C; Dumas, M; Schlager, E; Dermody, BJ; Aiuvalasit, M; Allen-Dumas, MR; Beecher, J; Bhatia, U; D'Odorico, P; Garcia, M; Gober, P; Groenfeldt, D; Lansing, S; Madani, K; Mendez-Barrientos, LE; Mondino, E; Muller, MF; O'Donnell, FC; Owuor, PM; Rising, J; Sanderson, MR; Souza, FAA; Zipper, SC	Developing a sustainability science approach for water systems	ECOLOGY AND SOCIETY	institutions; socio-hydrology; water systems	We convened a workshop to enable scientists who study water systems from both social science and physical science perspectives to develop a shared language. This shared language is necessary to bridge a divide between these disciplines' different conceptual frameworks. As a result of this workshop, we argue that we should view socio-hydrological systems as structurally coconstituted of social, en…		2020	25	2			23	10.5751/ES-11515-250223	Ecology; Environmental Studies	Environmental Sciences & Ecology	WoS
Peng, XY; Adamowski, J; Inam, A; Alizadeh, MR; Albano, R	Development of a behaviour-pattern based global sensitivity analysis procedure for coupled socioeconomic and environmental models	JOURNAL OF HYDROLOGY	Coupled socioeconomic and environmental modelling; Socio-hydrology; Morris; EFAST; Sensitivity analysis; Groundwater	Dynamically Coupled Socioeconomic system dynamics models integrated with physically-based Environmental Models (DCSEM) can capture relationships between complex environmental and socioeconomic systems, and are promising tools for participatory environmental management involving the integration of various viewpoints, disciplines and processes for sustainable water resources management. However, th…	jan.adamowski@mcgill.ca	2020	585				124745	10.1016/j.jhydrol.2020.124745	Engineering, Civil; Geosciences, Multidisciplinary; Water Resources	Engineering; Geology; Water Resources	WoS
York, AM; Eakin, H; Bausch, JC; Smith-Heisters, S; Anderies, JM; Aggarwal, R; Leonard, B; Wright, K	Agricultural Water Governance in the Desert: Shifting Risks in Central Arizona	WATER ALTERNATIVES-AN INTERDISCIPLINARY JOURNAL ON WATER POLITICS AND DEVELOPMENT	Irrigated agriculture; drought; governance; climate change; Colorado River; Arizona	In Arizona, the policy debates over the Colorado River Basin Drought Contingency Plans exposed long-running tensions surrounding how we use and value scarce water resources in a desert. These negotiations also highlighted generations-old disputes between indigenous communities' water rights and Anglo settlers. This paper explores how irrigators respond to, and participate in, the crafting of inst…	abigail.york@asu.edu; hallie.eakin@asu.edu; jcbausch@asu.edu; skaidra.smith-heisters@asu.edu; marty.anderies@asu.edu; aggarwal@asu.edu; bryan.leonard@asu.edu; kewrigh4@asu.edu	2020	13	2	418	445			Environmental Studies; Water Resources	Environmental Sciences & Ecology; Water Resources	WoS
Ross, A; Chang, HJ	Socio-hydrology with hydrosocial theory: two sides of the same coin?	HYDROLOGICAL SCIENCES JOURNAL-JOURNAL DES SCIENCES HYDROLOGIQUES	socio-hydrology; hydrosocial; IWRM; resilience; drought; flood; water; theory; multi-scalar; actor-network	This paper reviews socio-hydrology and hydrosocial research, finding a sophisticated relationship with emergent syntheses. We examined 419 papers by topic, region of study, theories implemented, journal, and year published to ascertain trends in both subfields. We found important overlap and considerable difference between subfields. Whereas hydrosocial research took years to develop, socio-hydro…	aross@pdx.edu	2020	65	9	1443	1457		10.1080/02626667.2020.1761023	Water Resources	Water Resources	WoS
Michaelis, T; Brandimarte, L; Mazzoleni, M	Capturing flood-risk dynamics with a coupled agent-based and hydraulic modelling framework	HYDROLOGICAL SCIENCES JOURNAL-JOURNAL DES SCIENCES HYDROLOGIQUES	agent-based model (ABM); LISFLOOD; levee effect; adaptation effect; decision making	Two-way interactions and feedback between hydrological and social processes in settled floodplains determine the complex human-flood system and change vulnerability over time. To focus on the dynamic role of individual and governmental decision making on flood-risk management, we developed and implemented a coupled agent-based and hydraulic modelling framework. Within this framework, household ag…	luigia.brandimarte@abe.kth.se	2020	65	9	1458	1473		10.1080/02626667.2020.1750617	Water Resources	Water Resources	WoS
Pouladi, P; Afshar, A; Molajou, A; Afshar, MH	Socio-hydrological framework for investigating farmers' activities affecting the shrinkage of Urmia Lake; hybrid data mining and agent-based modelling	HYDROLOGICAL SCIENCES JOURNAL-JOURNAL DES SCIENCES HYDROLOGIQUES	socio-hydrology; agent-based modelling (ABM); data mining; association rule; decision-making process; Urmia Lake	Developing a general framework to capture the complexities associated with the non-linear and adaptive nature of farmers facing water resources scarcity is a challenging problem. This paper integrates agent-based modelling (ABM) and a data mining method to develop a hybrid socio-hydrological framework to provide future insights for policy-makers. The data associated with the farmers' main charact…	a_afshar@iust.ac.ir	2020	65	8	1249	1261		10.1080/02626667.2020.1749763	Water Resources	Water Resources	WoS
Albertini, C; Mazzoleni, M; Totaro, V; Iacobellis, V; Di Baldassarre, G	Socio-Hydrological Modelling: The Influence of Reservoir Management and Societal Responses on Flood Impacts	WATER	socio-hydrological modelling; reservoir management; societal responses; human-flood interactions	Over the last few years, several socio-hydrological studies have investigated the risk dynamics generated by the complex interactions between floods and societies, with a focus on either changing reservoir operation rules or raising levees. In this study, we propose a new socio-hydrological model of human-flood interactions that represents both changes in the reservoir management strategies and u…	cinzia.albertini@unina.it; maurizio.mazzoleni@geo.uu.se; vincenzo.totaro@poliba.it; vito.iacobellis@poliba.it; giuliano.dibaldassarre@geo.uu.se	2020	12	5			1384	10.3390/w12051384	Environmental Sciences; Water Resources	Environmental Sciences & Ecology; Water Resources	WoS
Lan, T; Zhang, HB; Xu, CY; Singh, VP; Lin, KR	Detection and attribution of abrupt shift in minor periods in human-impacted streamflow	JOURNAL OF HYDROLOGY	Runoff; Minor periods; Abrupt change; Human activities; IMFMGF; Wei River basin	Understanding the long-term variability of streamflow and its response to human activities in water-limited areas is essential for socio-hydrologic models' development. In this study, a framework for the detection and attribution of abrupt shift of minor periods in human-impacted streamflow is proposed. First, the most significant abrupt shift in human-impacted streamflow is detected using the Pe…	lant8@mail2.sysu.edu.cn; hbzhang@chd.edu.cn; c.y.xu@geo.uio.no; vsingh@tamu.edu; linkr@mail.sysu.edu.cn	2020	584				124637	10.1016/j.jhydrol.2020.124637	Engineering, Civil; Geosciences, Multidisciplinary; Water Resources	Engineering; Geology; Water Resources	WoS
Buarque, ACS; Bhattacharya-Mis, N; Fava, MC; de Souza, FAA; Mendiondo, EM	Using historical source data to understand urban flood risk: a socio-hydrological modelling application at Gregorio Creek, Brazil	HYDROLOGICAL SCIENCES JOURNAL-JOURNAL DES SCIENCES HYDROLOGIQUES	urban floods; socio-hydrology; flood risk; social memory of floods; historical data source	The city of Sao Carlos, state of Sao Paulo, Brazil, has a historical coexistence between society and floods. Unplanned urbanization in this area is a representative feature of how Brazilian cities have developed, undermining the impact of natural hazards. The Gregorio Creek catchment is an enigma of complex dynamics concerning the relationship between humans and water in Brazilian cities. Our hyp…	acsbuarque@usp.br	2020	65	7	1075	1083		10.1080/02626667.2020.1740705	Water Resources	Water Resources	WoS
Lally, D; Forbes, CT	Sociohydrologic Systems Thinking: An Analysis of Undergraduate Students' Operationalization and Modeling of Coupled Human-Water Systems	WATER	undergraduate; systems thinking; water; geoscience	One of the keys to science and environmental literacy is systems thinking. Learning how to think about the interactions between systems, the far-reaching effects of a system, and the dynamic nature of systems are all critical outcomes of science learning. However, students need support to develop systems thinking skills in undergraduate geoscience classrooms. While systems thinking-focused instru…	dlally@huskers.unl.edu; cory.forbes@unl.edu	2020	12	4			1040	10.3390/w12041040	Environmental Sciences; Water Resources	Environmental Sciences & Ecology; Water Resources	WoS
Wallington, K; Cai, XM	Feedback Between Reservoir Operation and Floodplain Development: Implications for Reservoir Benefits and Beneficiaries	WATER RESOURCES RESEARCH	coevolution; social cost; flood control; water conservation; hydropower; socio-hydrology	Currently, reservoir operation researchers and decision makers weigh the trade-off between water conservation and flood control at the event and seasonal scales but have neglected the role of socioeconomic dynamics which unfold over longer time scales. However, ongoing advances in understanding human-flood interactions provide an exemplary opportunity to diverge from this traditional treatment an…	xmcai@illinois.edu	2020	56	4				10.1029/2019WR026610	Environmental Sciences; Limnology; Water Resources	Environmental Sciences & Ecology; Marine & Freshwater Biology; Water Resources	WoS
Palop-Donat, C; Paredes-Arquiola, J; Solera, A; Andreu, J	Comparing performance indicators to characterize the water supply to the demands of the Guadiana River basin (Spain)	HYDROLOGICAL SCIENCES JOURNAL-JOURNAL DES SCIENCES HYDROLOGIQUES	sustainability indicators; reliability indicators; water allocation model; climate change; Guadiana River basin; socio-hydrology; reliability; resilience; vulnerability	Water indicators and indices are useful tools to assess river basin performance, that is, to measure whether the basin operates satisfactorily under a wide range of possible future demands and hydrological conditions. Spanish regulations assess the performance of water demands by using reliability indicators (RIs), established by law in 2008. This article raises the possibility of updating RIs by…	carpado@cam.upv.es	2020	65	7	1060	1074		10.1080/02626667.2020.1734812	Water Resources	Water Resources	WoS
Jeong, H; Bhattarai, R; Adamowski, J; Yu, DJ	Insights from socio-hydrological modeling to design sustainable wastewater reuse strategies for agriculture at the watershed scale	AGRICULTURAL WATER MANAGEMENT	Coupled human and water systems; Irrigation; Possibility space; Socio-hydrology; Urbanization; Water reuse	Wastewater reuse in agriculture can be a viable option to solve future freshwater shortages but may need an additional treatment process (Stage-II) to become a safe option. As wastewater reuse interacts with many facets of coupled human and water systems, the introduction of Stage-II treatment systems in wastewater reuse in agriculture must be understood in terms of socio-hydrology. This paper bu…	hanjeong@seoultech.ac.kr	2020	231				105983	10.1016/j.agwat.2019.105983	Agronomy; Water Resources	Agriculture; Water Resources	WoS
Zhao, WW; Ding, JY; Wang, YP; Jia, LZ; Cao, WF; Tarolli, P	Ecological water conveyance drives human-water system evolution in the Heihe watershed, China	ENVIRONMENTAL RESEARCH	Human-water system; Ecological restoration; Water resources management; Sociohydrology; Heihe river; Ecological water conveyance; Hypothesis of disturbance effect transmutation	Watersheds are coupled with human-water systems where human, and water resources interact and coevolve with each other. Restoration management not only affects the ecosystem itself but also alters the mutual feedback relationship between humans and water, resulting in additional effects and impeding the ecological restoration process. Taking the lower reaches of the Heihe River as an example (Inn…	zhaoww@bnu.edu.cn	2020	182				109009	10.1016/j.envres.2019.109009	Environmental Sciences; Public, Environmental & Occupational Health	Environmental Sciences & Ecology; Public, Environmental & Occupational Health	WoS
Mondino, E; Scolobig, A; Borga, M; Albrecht, F; Mard, J; Weyrich, P; Di Baldassarre, G	Exploring changes in hydrogeological risk awareness and preparedness over time: a case study in northeastern Italy	HYDROLOGICAL SCIENCES JOURNAL-JOURNAL DES SCIENCES HYDROLOGIQUES	socio-hydrology; risk awareness; risk preparedness; debris flow; longitudinal data; hydrogeological hazard	Hydrogeological hazards are increasingly causing damage worldwide due to climatic and socio-economic changes. Building resilient communities is crucial to reduce potential losses. To this end, one of the first steps is to understand how people perceive potential threats around them. This study aims at exploring how risk awareness of, and preparedness to, face hydrological hazards changes over tim…	elena.mondino@geo.uu.se	2020	65	7	1049	1059		10.1080/02626667.2020.1729361	Water Resources	Water Resources	WoS
Ferdous, MR; Di Baldassarre, G; Brandimarte, L; Wesselink, A	The interplay between structural flood protection, population density, and flood mortality along the Jamuna River, Bangladesh	REGIONAL ENVIRONMENTAL CHANGE	Flood risk management; Socio-hydrology; Levee effect; Bangladesh	Levees protect floodplain areas from frequent flooding, but they can paradoxically contribute to more severe flood losses. The construction or reinforcement of levees can attract more assets and people in flood-prone area, thereby increasing the potential flood damage when levees eventually fail. Moreover, structural protection measures can generate a sense of complacency, which can reduce prepar…	m.ferdous@un-ihe.org; giuliano.dibaldassarre@geo.uu.se; luigia.brandimarte@abe.kth.se; a.wesselink@un-ihe.org	2020	20	1			5	10.1007/s10113-020-01600-1	Environmental Sciences; Environmental Studies	Environmental Sciences & Ecology	WoS
Al-Maktoumi, A; Zekri, S; El-Rawy, M; Abdalla, O; Al-Abri, R; Triki, C; Bazargan-Lari, MR	Aquifer storage and recovery, and managed aquifer recharge of reclaimed water for management of coastal aquifers	DESALINATION AND WATER TREATMENT	Managed aquifer recharge; Aquifer storage and recovery; Salinity; Coastal aquifer; Oman	The hydrological and economic feasibility of aquifer storage and recovery (ASR) of excess desalinated water and managed aquifer recharge (MAR) using tertiary treated wastewater (TTWW) to manage stressed coastal aquifers in Oman has been studied numerically using the code, MODFLOW 2005 and the different transport packages MT3DMS, and MODPATH. The current ASR study aims to assess the feasibility of…	ali4530@squ.edu.om	2020	176		67	77		10.5004/dwt.2020.25499	Engineering, Chemical; Water Resources	Engineering; Water Resources	WoS
Hossain, MB; Mertig, AG	Socio-structural forces predicting global water footprint: socio-hydrology and ecologically unequal exchange	HYDROLOGICAL SCIENCES JOURNAL-JOURNAL DES SCIENCES HYDROLOGIQUES	world-systems perspective; ecologically unequal exchange; water footprint; socio-hydrology; path analysis; global water resources; virtual water trade	Growth in water use and threatened shortages of water have become increasingly important in the modern world system. Natural resources are exploited extensively by capitalist interests in industrially advanced nations, while the lower strata of the world system, the underdeveloped societies, are left with limited access to natural resources for their productive processes, particularly water resou…	belal.hossain@okstate.edu	2020	65	4	495	506		10.1080/02626667.2020.1714052	Water Resources	Water Resources	WoS
O'Keeffe, J; Moulds, S; Scheidegger, JM; Jackson, CR; Nair, T; Mijic, A	Isolating the impacts of anthropogenic water use within the hydrological regime of north India	EARTH SURFACE PROCESSES AND LANDFORMS	socio-hydrological model; water resources; hydrological cycle; human impacts; irrigation water use; groundwater; canals	The effects of anthropogenic water use play a significant role in determining the hydrological cycle of north India. This paper explores anthropogenic impacts within the region's hydrological regime by explicitly including observed human water use behaviour, irrigation infrastructure and the natural environment in the CHANSE (Coupled Human And Natural Systems Environment) socio-hydrological model…	jimmy.okeeffe@imperial.ac.uk	2020	45	5	1217	1228		10.1002/esp.4799	Geography, Physical; Geosciences, Multidisciplinary	Physical Geography; Geology	WoS
Han, YP; Huang, QX; He, CY; Fang, YQ; Wen, JH; Gao, J; Du, SQ	The growth mode of built-up land in floodplains and its impacts on flood vulnerability	SCIENCE OF THE TOTAL ENVIRONMENT	Socio-hydrology; Flood risk management; Urban planning; Urban sustainability; Nature-based adaptation	Built-up land in floodplains (BLF) is a vital indicator of the socio-hydrological system, and its dynamics are key to understanding and managing flood risk. However, previous studies have neglected the impacts of BLF growth modes (e.g., patch sizes and expansion types) on flood vulnerability. This paper fills this gap by assessing the BLF's growth modes and revealing their divergent impacts on fl…	qxhuang@bnu.edu.cn; hcy@bnu.edu.cn; jhwen@shnu.edu.cn; gaojun@shnu.edu.cn; shiqiangdu@shnu.edu.cn	2020	700				134462	10.1016/j.scitotenv.2019.134462	Environmental Sciences	Environmental Sciences & Ecology	WoS
Khalifa, M; Elagib, NA; Ahmed, BM; Ribbe, L; Schneider, K	Exploring socio-hydrological determinants of crop yield in under-performing irrigation schemes: pathways for sustainable intensification	HYDROLOGICAL SCIENCES JOURNAL-JOURNAL DES SCIENCES HYDROLOGIQUES	sustainable intensification; Gezira Irrigation Scheme; productivity gap; socio-hydrology; remote sensing; regression tree	Understanding the human-water-food-climate nexus is central to achieving sustainable intensification (SI) in agriculture. This research uses a socio-hydrological approach to understand the underpinning for implementing SI in the Gezira Irrigation Scheme, Sudan, by integrating vegetation indices derived from remote sensing, ancillary, gridded soil and precipitation data, supplemented by interviews…	mkhalifa@smail.uni-koeln.de	2020	65	2	153	168		10.1080/02626667.2019.1688333	Water Resources	Water Resources	WoS
Ridolfi, E; Albrecht, F; Di Baldassarre, G	Exploring the role of risk perception in influencing flood losses over time	HYDROLOGICAL SCIENCES JOURNAL-JOURNAL DES SCIENCES HYDROLOGIQUES	flood risk; socio-hydrology; resilience; risk awareness; cultural theory	What implications do societies' risk perceptions have for flood losses? This study uses a stylized, socio-hydrological model to simulate the mutual feedbacks between human societies and flood events. It integrates hydrological modelling with cultural theory and proposes four ideal types of society that reflect existing dominant risk perception and management: risk neglecting, risk monitoring, ris…	elena.ridolfi@geo.uu.se	2020	65	1	12	20		10.1080/02626667.2019.1677907	Water Resources	Water Resources	WoS
Sultana, P; Thompson, PM; Wesselink, A	Coping and resilience in riverine Bangladesh	ENVIRONMENTAL HAZARDS-HUMAN AND POLICY DIMENSIONS	Bangladesh; erosion; flood; infrastructure; migration; socio-hydrology	This paper investigates the impacts of two successive years of severe floods on households, their coping strategies and resilience to riverine hazards in northern Bangladesh. Based on focus groups and interviews with the same households after floods in 2016 and 2017, we found a cumulative decline in assets through sale of livestock and borrowing, and almost all households evacuated short term to …	parvin@agni.com	2020	19	1	70	89		10.1080/17477891.2019.1665981	Environmental Studies	Environmental Sciences & Ecology	WoS
Kumar P., Avtar R., Dasgupta R., Johnson B.A., Mukherjee A., Ahsan M.N., Nguyen D.C.H., Nguyen H.Q., Shaw R., Mishra B.K.	Socio-hydrology: A key approach for adaptation to water scarcity and achieving human well-being in large riverine islands	Progress in Disaster Science	Asia; Global change; Riverine islands; Socio-hydrology	Rapid global changes (population growth, urbanization and frequent extreme weather conditions) have cumulatively affected local water bodies and resulted in unfavorable hydrological, ecological, and environmental changes in the major river systems. Particularly, communities in isolated riverine islands are heavily affected due to their poor adaptive capacities, which is well documented in the con…	Kumar, P.; Natural Resources and Ecosystem Services, Japan; email: kumar@iges.or.jp	2020	8				100134	10.1016/j.pdisas.2020.100134			Scopus
Carr G., Barendrecht M.H., Debevec L., Kuil L., Blöschl G.	People and water: Understanding integrated systems needs integrated approaches	Journal of Water Supply: Research and Technology - AQUA	Interdisciplinary; Socio-hydrology; Water management	As we rapidly modify the environment around us, researchers have a critical role to play in raising our understanding of the interactions between people and the world in which they live. Knowledge and understanding of these interactions are essential for evidence based decision-making on resource use and risk management. In this paper, we explore three research case studies that illustrate co-evo…	Carr, G.; Institute of Hydraulic Engineering and Water Resources Management, Austria; email: carr@waterresources.at	2020	69	8	819	832		10.2166/aqua.2020.055			Scopus
Barandun M., Fiddes J., Scherler M., Mathys T., Saks T., Petrakov D., Hoelzle M.	The state and future of the cryosphere in Central Asia	Water Security		Snow, glaciers and permafrost translate fluctuations of atmospheric conditions and highlight current environmental changes. Monitoring of these changes is one of the major objectives of the international climate observation strategy developed by the Global Climate Observing System (GCOS). Under ongoing climate change, the implication of altering meltwater released by snow, ice and permafrost will…	Barandun, M.; Department of Geosciences, Switzerland	2020	11				100072	10.1016/j.wasec.2020.100072			Scopus
Garcia M., Ridolfi E., Di Baldassarre G.	The interplay between reservoir storage and operating rules under evolving conditions	Journal of Hydrology	Drought; Fragility; Reservoir; Robustness; Sociohydrology; System dynamics	Reservoir storage helps manage hydrological variability, increasing predictability and productivity of water supply. However, there are inevitable tradeoffs, with control of high frequency variability coming at the expense of robustness to low frequency variability. Tightly controlling variability can reduce incentives to maintain adaptive capacity needed during events that exceed design threshol…	Garcia, M.; Arizona State University, 660 College Ave, United States; email: M.Garcia@asu.edu	2020	590				125270	10.1016/j.jhydrol.2020.125270			Scopus
Li B., Sivapalan M.	Long-Term Coevolution of an Urban Human-Water System Under Climate Change: Critical Role of Human Adaptive Actions	Water Resources Research	climate change; interbasin transfer; sociohydrology; urban hydrology; water management; water supply	The impacts of climate change and human activities are challenging water sustainability in many cities around the world. Advanced understanding of the future long-term coevolution of coupled urban human-water systems is of considerable interest in this context. This study uses a previously developed sociohydrologic model to explore the coevolutionary trajectories of Beijing City's human-water sys…	Li, B.; Beijing Key Laboratory of Urban Hydrological Cycle and Sponge City Technology, China; email: libin@mail.bnu.edu.cn	2020	56	11			e2020WR027931	10.1029/2020WR027931			Scopus
Alonso Vicario S., Mazzoleni M., Bhamidipati S., Gharesifard M., Ridolfi E., Pandolfo C., Alfonso L.	Unravelling the influence of human behaviour on reducing casualties during flood evacuation	Hydrological Sciences Journal	agent-based modelling; flood evacuation; flood modelling; human evacuation behaviour; socio-hydrology; unsolved problems in hydrology (UPH); UPH #21	Floods are the natural hazards that are causing the most deaths worldwide. Flood early warning systems are one of the most cost-efficient methods to reduce death rates, triggering decisions about the evacuation of exposed population. Although previous studies have investigated the effect of human behaviours on evacuation processes, studies analysing a combination of behaviours, flood onset and wa…	Alonso Vicario, S.; IHE Delft, Netherlands; email: saralonsovicario@gmail.com	2020	65	14	2359	2375		10.1080/02626667.2020.1810254			Scopus
Knighton J., Buchanan B., Guzman C., Elliott R., White E., Rahm B.	Predicting flood insurance claims with hydrologic and socioeconomic demographics via machine learning: Exploring the roles of topography, minority populations, and political dissimilarity	Journal of Environmental Management	FEMA; Flooding; Flooding insurance claims; LIS-FLOOD; Random forest; Socio-hydrology; Vulnerability	Current research on flooding risk often focuses on understanding hazards, de-emphasizing the complex pathways of exposure and vulnerability. We investigated the use of both hydrologic and social demographic data for flood exposure mapping with Random Forest (RF) regression and classification algorithms trained to predict both parcel- and tract-level flood insurance claims within New York State, U…	Knighton, J.; The National Socio-Environmental Synthesis CenterUnited States; email: jknighton@sesync.org	2020	272				111051	10.1016/j.jenvman.2020.111051			Scopus
Sawada Y., Hanazaki R.	Socio-hydrological data assimilation: Analyzing human-flood interactions by model-data integration	Hydrology and Earth System Sciences		In socio-hydrology, human-water interactions are simulated by mathematical models. Although the integration of these socio-hydrological models and observation data is necessary for improving the understanding of human-water interactions, the methodological development of the model-data integration in socio-hydrology is in its infancy. Here we propose applying sequential data assimilation, which h…	Sawada, Y.; Institute of Engineering Innovation, Japan; email: yohei.sawada@sogo.t.u-tokyo.ac.jp	2020	24	10	4777	4791		10.5194/hess-24-4777-2020			Scopus
Enteshari S., Safavi H.R., van der Zaag P.	Simulating the interactions between the water and the socio-economic system in a stressed endorheic basin	Hydrological Sciences Journal	Iran; IWRM; scenario analysis; socio-hydrology; Zayandehrud	The endorheic basin of Zayandehrud in Iran suffers from environmental problems, social tensions, and economic instability. Lack of understanding how the water system and the socio-economic system interact may explain these challenges. A system dynamics model, being a holistic simulation tool, was developed for the Zayandehrud basin and used to evaluate several policy scenarios. The indices of emp…	van der Zaag, P.; Department of Land and Water Management, Netherlands; email: p.vanderzaag@un-ihe.org	2020	65	13	2159	2174		10.1080/02626667.2020.1802027			Scopus
Owens D.C., Petitt D.N., Lally D., Forbes C.T.	Cultivating water literacy in stem education: Undergraduates’ socio-scientific reasoning about socio-hydrologic issues	Water (Switzerland)	Functional scientific literacy; Socio-hydrological issues; Socio-scientific reasoning	Water-literate individuals effectively reason about the hydrologic concepts that underlie socio-hydrological issues (SHI), but functional water literacy also requires concomitant reasoning about the societal, non-hydrological aspects of SHI. Therefore, this study explored the potential for the socio-scientific reasoning construct (SSR), which includes consideration of the complexity of issues, th…	Owens, D.C.; Department of Middle Grades and Secondary Education, United States; email: dcowens@georgiasouthern.edu	2020	12	10			2857	10.3390/w12102857			Scopus
Bano R., Khiadani M., Burian S.	Socio-hydrological modelling to assess reliability of an urban water system under formal-informal supply dynamics	Water (Switzerland)	Consumer behaviour; Financial sustainability; Formal and informal water supply systems; Socio-hydrological modelling; System dynamics; Tariff recovery	Increasing water scarcity in developing world cities combined with poor performance of water supply systems has led to an increasing reliance on informal water supply systems. Although the availability of informal supply provides a coping mechanism that enables water consumers to be resilient to failures in water supply, the longer-term effects on formal water supply systems (FWSS) are uncertain,…	Bano, R.; School of Engineering, 270 Joondalup Drive, Australia; email: r.bano@ecu.edu.au	2020	12	10			2795	10.3390/w12102795			Scopus
Wang G., Hu Z., Liu Y., Zhang G., Liu J., Lyu Y., Gu Y., Huang X., Zhang Q., Tong Z., Hong C., Liu L.	Impact of expansion pattern of built-up land in floodplains on flood vulnerability: A case study in the North China plain area	Remote Sensing	Adaptation strategy; Built-up land in floodplains; Flood vulnerability; GIS-based landscape analysis; Impact; Socio-hydrology	Built-up land in floodplains (BLF) is a driver and a disaster-bearing body of flood risk from a socio-hydrological perspective. The relationship between BLF growth and flood vulnerability is the key to understanding and managing flood risk. However, previous studies have focused more on the relationship between BLF growth and flood exposure, ignoring flood vulnerability. We examined the BLF expan…	Liu, L.; Key Laboratory of Environmental Change and Natural Disaster, China; email: lyliu@bnu.edu.cn	2020	12	19	1	29	3172	10.3390/rs12193172			Scopus
Riaux J., Ogilvie A., Jenhaoui Z.	More than just water! Hydraulic materiality and the process of resource making: A sociohydrological reading of Tunisian hillside reservoirs	Journal of Rural Studies	Hydraulic locality; Resource making; Small reservoirs; Tunisia; Water	Fulfilling both “Water and soil conservation” and “Integrated rural development” objectives, hillside reservoirs are very popular components of water and/or rural management strategies. In Central Tunisia, more than 800 reservoirs have been built since the 1950s. These have been the subject of an abundant literature by both social and physical scientists. However, this literature, which is highly…	Riaux, J.; IRD, 361 rue J-F Breton BP 5095, France; email: jeanne.riaux@ird.fr	2020	79		125	135		10.1016/j.jrurstud.2020.08.041			Scopus
Koutiva I., Lykou A., Pantazis C., Makropoulos C.	Investigating decision mechanisms of statutory stakeholders in flood risk strategy formation: A computational experiments approach	Water (Switzerland)	Agent based modelling; Decision making support; Flood risk management; Socio-hydrology	Cities at risk of extreme hydro-meteorological events need to be prepared to decrease the extent of the impacts. However, sometimes, authorities only react to catastrophes failing to proactively prepare against extremes. This can be a result of both absent structural protection measures and problematic governance. While for the first, models exist that can simulate the effect, the effect of the l…	Koutiva, I.; Department of Water Resources and Environmental Engineering, Greece; email: ikoutiva@mail.ntua.gr	2020	12	10			2716	10.3390/w12102716			Scopus
Herrera-Franco G., Carrión-Mero P., Aguilar-Aguilar M., Morante-Carballo F., Jaya-Montalvo M., Morillo-Balsera M.C.	Groundwater resilience assessment in a communal coastal aquifer system. The case of manglaralto in Santa Elena, Ecuador	Sustainability (Switzerland)	Coastal aquifer; Groundwater; Resilience assessment; Rural community; Sustainable Development Goals and indicators	Resilience has several meanings, among them the ability to overcome difficulty and return to the state of providing service, even if the initial conditions change. Assessing resilience in an ecosystem, or any system, requires a concise methodology with standard variables and parameters. The current challenge presented by coastal areas is focused on overcoming problems related to the water supply …	Herrera-Franco, G.; Facultad de Ciencias de la Ingeniería, Avda. Principal La Libertad-Santa Elena, Ecuador; email: grisherrera@upse.edu.ec	2020	12	19			8290	10.3390/su12198290			Scopus
Aghaie V., Alizadeh H., Afshar A.	Emergence of social norms in the cap-and-trade policy: An agent-based groundwater market	Journal of Hydrology	Agent-based modeling; Cap-and-trade policy; Collective action; Groundwater market; Social norms; Socio-hydrology	Cap-and-trade policy is generally considered an effective instrument in groundwater markets since it can facilitate environmental protection and sustainable groundwater use. While this policy is implemented in several aquifers all over the world, there is a limited understanding of its social impacts, like how compliance and noncompliance behaviors may emerge. This study presents an agent-based g…	Alizadeh, H.; School of Civil Engineering, Iran; email: alizadeh@iust.ac.ir	2020	588				125057	10.1016/j.jhydrol.2020.125057			Scopus
Savenije H.H.G., van der Zaag P.	Water value flows upstream	Water (Switzerland)	Integrated assessment; Valuation; Water economics; Water resources management	Arjen Hoekstra postulated in 2001 that the value of water accumulates in an upstream direction: water value flows upstream. The ultimate source of this value is the rain. This original idea he used to develop the water value-flow concept. This article shows that the water value-flow concept has much to offer in terms of contemporary challenges. It is fully consistent with the "Five Bellagio Princ…	van der Zaag, P.; Water Management Department, Netherlands; email: p.vanderzaag@un-ihe.org	2020	12	9			2642	10.3390/w12092642			Scopus
Boluwade A.	Spatial-temporal assessment of satellite-based rainfall estimates in different precipitation regimes in water-scarce and data-sparse regions	Atmosphere	Arid country; Flood resilience; Hydrology; Rainfall pattern; Satellite precipitation	Accurate precipitation measurement is very important for socio-hydrological resilience in the face of frequent extreme weather events such as cyclones. This study evaluates the performance of two satellite products: the Tropical Rainfall Measuring Mission (TRMM 3B43V7) Multi-satellite Precipitation Analysis (TMPA, hereafter: TRMM) and the Integrated Multi-satellite Retrievals for GPM (IMERG, Fina…	Boluwade, A.; Department of Soil, Oman; email: alaba@squ.edu.om	2020	11	9			901	10.3390/ATMOS11090901			Scopus
Medeiros P., Sivapalan M.	From hard-path to soft-path solutions: slow–fast dynamics of human adaptation to droughts in a water scarce environment	Hydrological Sciences Journal	coupled human–water system; drought; Socio-hydrology; sustainability; unanticipated feedbacks	Droughts have long impacted humans with adverse consequences, hindering the achievement of the United Nations Sustainable Development Goals. To reduce vulnerability, multiple ways of adaptation have been developed, most of which, historically, focused on “hard-path” implementation of infrastructure. However, since water consumption plays a major role in the supply–demand balance, “soft-path” solu…	Medeiros, P.; Federal Institute of Education, Av. Parque Central, S/N - Distrito Industrial I, Brazil; email: phamedeiros@ifce.edu.br	2020	65	11	1803	1814		10.1080/02626667.2020.1770258			Scopus
Roobavannan M., Kandasamy J., Pande S., Vigneswaran S., Sivapalan M.	Sustainability of agricultural basin development under uncertain future climate and economic conditions: A socio-hydrological analysis	Ecological Economics	Future projections; Safe operating space; Socio-hydrology; Sustainable development; Values and preferences	A socio-hydrological model is used to forecast future conditions in a river basin arising from changes in climate and the economy in order to learn about macroeconomic conditions that would yield pathways for sustainable development and how they may be affected by changes in climate and the economy. The study uses a system dynamics model with endogenous social values and preferences and exogenous…	Kandasamy, J.; School of Civil and Environmental Engineering, PO BOX 123, Australia; email: jaya.kandasamy@uts.edu.au	2020	174				106665	10.1016/j.ecolecon.2020.106665			Scopus
Mondino E., Scolobig A., Borga M., Di Baldassarre G.	The role of experience and different sources of knowledge in shaping flood risk awareness	Water (Switzerland)	Flooding; Natural hazards; Risk awareness; Sociohydrology	Understanding what makes people vulnerable to flooding is key in informing the risk management process. Non-structural measures, such as risk communication, can reduce vulnerability by improving flood risk awareness, but they require a deep understanding of which factors influence risk awareness, and how. We analysed and untangled the role of experience with, and knowledge of, floods by conductin…	Mondino, E.; Department of Earth Sciences, Sweden; email: elena.mondino@geo.uu.se	2020	12	8			2130	10.3390/W12082130			Scopus
Ross A., Chang H.	Socio-hydrology with hydrosocial theory: two sides of the same coin?	Hydrological Sciences Journal	actor-network; drought; flood; hydrosocial; IWRM; multi-scalar; resilience; socio-hydrology; theory; water	This paper reviews socio-hydrology and hydrosocial research, finding a sophisticated relationship with emergent syntheses. We examined 419 papers by topic, region of study, theories implemented, journal, and year published to ascertain trends in both subfields. We found important overlap and considerable difference between subfields. Whereas hydrosocial research took years to develop, socio-hydro…	Ross, A.; Department of Geography, United States; email: aross@pdx.edu	2020	65	9	1443	1457		10.1080/02626667.2020.1761023			Scopus
Michaelis T., Brandimarte L., Mazzoleni M.	Capturing flood-risk dynamics with a coupled agent-based and hydraulic modelling framework	Hydrological Sciences Journal	adaptation effect; agent-based model (ABM); decision making; levee effect; LISFLOOD	Two-way interactions and feedback between hydrological and social processes in settled floodplains determine the complex human–flood system and change vulnerability over time. To focus on the dynamic role of individual and governmental decision making on flood-risk management, we developed and implemented a coupled agent-based and hydraulic modelling framework. Within this framework, household ag…	Brandimarte, L.; Department of Sustainable Development, Sweden; email: luigia.brandimarte@abe.kth.se	2020	65	9	1458	1473		10.1080/02626667.2020.1750617			Scopus
Madani K., Shafiee-Jood M.	Socio-hydrology: A new understanding to unite or a new science to divide?	Water (Switzerland)	CHANS; Human-nature systems; Human-water systems; Hydro-sociology; Hydrology; Integrated water resources management; IWRM; SES; Social-ecological systems; Socio-hydrologic modeling; Socio-hydrology; Water resources management; Water resources systems	The socio-hydrology community has been very successful in promoting the need for taking the human factor into account in the mainstream hydrology literature since 2012. However, the interest in studying and modeling human-water systems is not new and pre-existed the post-2012 socio-hydrology. So, it is critical to ask what socio-hydrology has been able to offer that would have been unachievable u…	Madani, K.; Department of Political Science, United States; email: kaveh.madani@yale.edu	2020	12	7			1941	10.3390/w12071941			Scopus
Orduña Alegría M.E., Schütze N., Zipper S.C.	A serious board game to analyze socio-ecological dynamics towards collaboration in agriculture+	Sustainability (Switzerland)	Agent-based modeling; Decision-making parameters; Irrigation; Serious games; Socio-hydrology	Climate change exacerbates water scarcity and associated conflicts over water resources. To address said conflicts and achieve sustainable use of water resources in agriculture, further development of socio-ecological adaptations are required. In this study, we evaluate the ability of MAHIZ, a serious board game, to analyze socio-hydrological dynamics related to irrigated agriculture. Gameplay in…	Orduña Alegría, M.E.; Institute of Hydrology and Meteorology, Germany; email: maria_elena.orduna_alegria@tu-dresden.de	2020	12	13			5301	10.3390/su12135301			Scopus
Pouladi P., Afshar A., Molajou A., Afshar M.H.	Socio-hydrological framework for investigating farmers’ activities affecting the shrinkage of Urmia Lake; hybrid data mining and agent-based modelling	Hydrological Sciences Journal	agent-based modelling (ABM); association rule; data mining; decision-making process; socio-hydrology; Urmia Lake	Developing a general framework to capture the complexities associated with the non-linear and adaptive nature of farmers facing water resources scarcity is a challenging problem. This paper integrates agent-based modelling (ABM) and a data mining method to develop a hybrid socio-hydrological framework to provide future insights for policy-makers. The data associated with the farmers’ main charact…	Afshar, A.; School of Civil Engineering, Iran; email: a_afshar@iust.ac.ir	2020	65	8	1249	1261		10.1080/02626667.2020.1749763			Scopus
Dziubanski D., Franz K.J., Gutowski W.	Linking economic and social factors to peak flows in an agricultural watershed using socio-hydrologic modeling	Hydrology and Earth System Sciences		Hydrologic modeling studies most often represent humans through predefined actions and fail to account for human responses under changing hydrologic conditions. By treating both human and hydrologic systems as co-evolving, we build a socio-hydrological model that combines an agent-based model (ABM) with a semi-distributed hydrologic model. The curve number method is used to clearly illustrate the…	Dziubanski, D.; Department of Geological and Atmospheric Sciences, United States; email: dave.dziubanski@gmail.com	2020	24	6	2873	2894		10.5194/hess-24-2873-2020			Scopus
Brelsford C., Dumas M., Schlager E., Dermody B.J., Aiuvalasit M., Allen-Dumas M.R., Beecher J., Bhatia U., D'odorico P., Garcia M., Gober P., Groenfeldt D., Lansing S., Madani K., Méndez-Barrientos L.E., Mondino E., Müller M.F., O'donnell F.C., Owuor P.M., Rising J., Sanderson M.R., Souza F.A.A., Zipper S.C.	Developing a sustainability science approach for water systems	Ecology and Society	Institutions; Socio-hydrology; Water systems	We convened a workshop to enable scientists who study water systems from both social science and physical science perspectives to develop a shared language. This shared language is necessary to bridge a divide between these disciplines’ different conceptual frameworks. As a result of this workshop, we argue that we should view socio-hydrological systems as structurally co-constituted of social, e…		2020	25	2	1	6	23	10.5751/ES-11515-250223			Scopus
Peng X., Adamowski J., Inam A., Alizadeh M.R., Albano R.	Development of a behaviour-pattern based global sensitivity analysis procedure for coupled socioeconomic and environmental models	Journal of Hydrology	Coupled socioeconomic and environmental modelling; EFAST; Groundwater; Morris; Sensitivity analysis; Socio-hydrology	Dynamically Coupled Socioeconomic system dynamics models integrated with physically-based Environmental Models (DCSEM) can capture relationships between complex environmental and socioeconomic systems, and are promising tools for participatory environmental management involving the integration of various viewpoints, disciplines and processes for sustainable water resources management. However, th…	Adamowski, J.; Dept. Bioresource Engineering, 21111 Lakeshore Road, St. Anne De Bellevue, Canada; email: jan.adamowski@mcgill.ca	2020	585				124745	10.1016/j.jhydrol.2020.124745			Scopus
Müller J., Dame J., Nüsser M.	Urban mountain waterscapes: The transformation of hydro-social relations in the Trans-Himalayan Town Leh, Ladakh, India	Water (Switzerland)	Hydro-social relations; Hydromentalities; Ladakh; Urban transition; Urbanisation; Water citizenships; Water governance; Water infrastructure; Waterscapes	Socio-economic processes and climate change impact the socio-hydrology of many small towns in the Hindu Kush Himalaya (HKH), such as Leh in Ladakh. The rapidly urbanising town experienced a shift from agricultural livelihoods towards incomes mainly relying on the tourism sector. As results of this research show, the limited water resources essential to the everyday life of urban citizens have bec…	Müller, J.; Heidelberg Center for the Environment (HCE), Germany; email: judith.mueller@uni-heidelberg.de	2020	12	6			1698	10.3390/W12061698			Scopus
Mitra S., Roy A.K., Tamang L.	Assessing the Status of Changing Channel Regimes of Balason and Mahananda River in the Sub-Himalayan West Bengal, India	Earth Systems and Environment	Anthropogenic intervention; Bed lowering; Channel narrowing; Landuse alteration; Sediment mining	Rapid infrastructural development, triggered by the economic policies implemented in 1991, subsequently modified the river channel planform of the Terai region of northern West Bengal, India, through perceptible channel fragmentation, excessive in-channel sediment mining and rampant landuse alterations of the floodplains. In this context, this study has attempted to assess the impacts of anthropo…	Tamang, L.; Department of Geography, India; email: ltgeog@caluniv.ac.in	2020	4	2	409	425		10.1007/s41748-020-00160-y			Scopus
Sarmento Buarque A.C., Bhattacharya-Mis N., Fava M.C., Souza F.A.A.D., Mendiondo E.M.	Using historical source data to understand urban flood risk: a socio-hydrological modelling application at Gregório Creek, Brazil	Hydrological Sciences Journal	flood risk; historical data source; social memory of floods; socio-hydrology; urban floods	The city of São Carlos, state of São Paulo, Brazil, has a historical coexistence between society and floods. Unplanned urbanization in this area is a representative feature of how Brazilian cities have developed, undermining the impact of natural hazards. The Gregório Creek catchment is an enigma of complex dynamics concerning the relationship between humans and water in Brazilian cities. Our hyp…	Sarmento Buarque, A.C.; Department of Hydraulic Engineering and Sanitation, Av. Trabalhador Sãocarlense, 400 CP 359, Brazil; email: acsbuarque@usp.br	2020	65	7	1075	1083		10.1080/02626667.2020.1740705			Scopus
Mondino E., Scolobig A., Borga M., Albrecht F., Mård J., Weyrich P., Di Baldassarre G.	Exploring changes in hydrogeological risk awareness and preparedness over time: a case study in northeastern Italy	Hydrological Sciences Journal	debris flow; hydrogeological hazard; longitudinal data; risk awareness; risk preparedness; socio-hydrology	Hydrogeological hazards are increasingly causing damage worldwide due to climatic and socio-economic changes. Building resilient communities is crucial to reduce potential losses. To this end, one of the first steps is to understand how people perceive potential threats around them. This study aims at exploring how risk awareness of, and preparedness to, face hydrological hazards changes over tim…	Mondino, E.; Department of Earth Sciences, Sweden; email: elena.mondino@geo.uu.se	2020	65	7	1049	1059		10.1080/02626667.2020.1729361			Scopus
Palop-Donat C., Paredes-Arquiola J., Solera A., Andreu J.	Comparing performance indicators to characterize the water supply to the demands of the Guadiana River basin (Spain)	Hydrological Sciences Journal	climate change; Guadiana River basin; reliability; reliability indicators; resilience; socio-hydrology; sustainability indicators; vulnerability; water allocation model	Water indicators and indices are useful tools to assess river basin performance, that is, to measure whether the basin operates satisfactorily under a wide range of possible future demands and hydrological conditions. Spanish regulations assess the performance of water demands by using reliability indicators (RIs), established by law in 2008. This article raises the possibility of updating RIs by…	Palop-Donat, C.; Research Institute of Water and Environmental Engineering (IIAMA), Camino de Vera S/N 46022, Spain; email: carpado@cam.upv.es	2020	65	7	1060	1074		10.1080/02626667.2020.1734812			Scopus
Albertini C., Mazzoleni M., Totaro V., Iacobellis V., Baldassarre G.D.	Socio-hydrological modelling: The influence of reservoir management and societal responses on flood impacts	Water (Switzerland)	Humanflood interactions; Reservoir management; Societal responses; Socio-hydrological modelling	Over the last few years, several socio-hydrological studies have investigated the risk dynamics generated by the complex interactions between floods and societies, with a focus on either changing reservoir operation rules or raising levees. In this study, we propose a new socio-hydrological model of human-flood interactions that represents both changes in the reservoir management strategies and u…	Totaro, V.; Dipartimento di Ingegneria Civile, Italy; email: vincenzo.totaro@poliba.it	2020	12	5			1384	10.3390/W12051384			Scopus
Lan T., Zhang H., Xu C.-Y., Singh V.P., Lin K.	Detection and attribution of abrupt shift in minor periods in human-impacted streamflow	Journal of Hydrology	Abrupt change; Human activities; IMFMGF; Minor periods; Runoff; Wei River basin	Understanding the long-term variability of streamflow and its response to human activities in water-limited areas is essential for socio-hydrologic models’ development. In this study, a framework for the detection and attribution of abrupt shift of minor periods in human-impacted streamflow is proposed. First, the most significant abrupt shift in human-impacted streamflow is detected using the Pe…	Zhang, H.; School of Water and Environment, China; email: hbzhang@chd.edu.cn	2020	584				124637	10.1016/j.jhydrol.2020.124637			Scopus
Lally D., Forbes C.T.	Sociohydrologic systems thinking: An analysis of undergraduate students' operationalization and modeling of coupled human-water systems	Water (Switzerland)	Geoscience; Systems thinking; Undergraduate; Water	One of the keys to science and environmental literacy is systems thinking. Learning how to think about the interactions between systems, the far-reaching effects of a system, and the dynamic nature of systems are all critical outcomes of science learning. However, students need support to develop systems thinking skills in undergraduate geoscience classrooms. While systems thinking-focused instru…	Lally, D.; School of Natural Resources, United States; email: dlally@huskers.unl.edu	2020	12	4			1040	10.3390/W12041040			Scopus
O'Keeffe J., Moulds S., Scheidegger J.M., Jackson C.R., Nair T., Mijic A.	Isolating the impacts of anthropogenic water use within the hydrological regime of north India	Earth Surface Processes and Landforms	canals; groundwater; human impacts; hydrological cycle; irrigation water use; socio-hydrological model; water resources	The effects of anthropogenic water use play a significant role in determining the hydrological cycle of north India. This paper explores anthropogenic impacts within the region's hydrological regime by explicitly including observed human water use behaviour, irrigation infrastructure and the natural environment in the CHANSE (Coupled Human And Natural Systems Environment) socio-hydrological model…	O'Keeffe, J.; Department of Civil and Environmental Engineering, United Kingdom; email: jimmy.okeeffe@imperial.ac.uk	2020	45	5	1217	1228		10.1002/esp.4799			Scopus
Wallington K., Cai X.	Feedback Between Reservoir Operation and Floodplain Development: Implications for Reservoir Benefits and Beneficiaries	Water Resources Research	coevolution; flood control; hydropower; social cost; socio-hydrology; water conservation	Currently, reservoir operation researchers and decision makers weigh the trade-off between water conservation and flood control at the event and seasonal scales but have neglected the role of socioeconomic dynamics which unfold over longer time scales. However, ongoing advances in understanding human-flood interactions provide an exemplary opportunity to diverge from this traditional treatment an…	Cai, X.; Department of Civil and Environmental Engineering, United States; email: xmcai@illinois.edu	2020	56	4			e24524	10.1029/2019WR026610			Scopus
Jeong H., Bhattarai R., Adamowski J., Yu D.J.	Insights from socio-hydrological modeling to design sustainable wastewater reuse strategies for agriculture at the watershed scale	Agricultural Water Management	Coupled human and water systems; Irrigation; Possibility space; Socio-hydrology; Urbanization; Water reuse	Wastewater reuse in agriculture can be a viable option to solve future freshwater shortages but may need an additional treatment process (Stage-II) to become a safe option. As wastewater reuse interacts with many facets of coupled human and water systems, the introduction of Stage-II treatment systems in wastewater reuse in agriculture must be understood in terms of socio-hydrology. This paper bu…	Jeong, H.; 120-1 Chungun Hall, 232 Gongneung-ro, Nowon-gu, South Korea; email: hanjeong@seoultech.ac.kr	2020	231				105983	10.1016/j.agwat.2019.105983			Scopus
Hossain M.B., Mertig A.G.	Socio-structural forces predicting global water footprint: socio-hydrology and ecologically unequal exchange	Hydrological Sciences Journal	ecologically unequal exchange; global water resources; path analysis; socio-hydrology; virtual water trade; water footprint; world-systems perspective	Growth in water use and threatened shortages of water have become increasingly important in the modern world system. Natural resources are exploited extensively by capitalist interests in industrially advanced nations, while the lower strata of the world system, the underdeveloped societies, are left with limited access to natural resources for their productive processes, particularly water resou…	Hossain, M.B.; Department of Sociology, 401 Murray Hall, United States; email: belal.hossain@okstate.edu	2020	65	4	495	506		10.1080/02626667.2020.1714052			Scopus
Ferdous M.R., Di Baldassarre G., Brandimarte L., Wesselink A.	The interplay between structural flood protection, population density, and flood mortality along the Jamuna River, Bangladesh	Regional Environmental Change	Bangladesh; Flood risk management; Levee effect;; Socio-hydrology;	Levees protect floodplain areas from frequent flooding, but they can paradoxically contribute to more severe flood losses. The construction or reinforcement of levees can attract more assets and people in flood-prone area, thereby increasing the potential flood damage when levees eventually fail. Moreover, structural protection measures can generate a sense of complacency, which can reduce prepar…	Di Baldassarre, G.; Department of Integrated Water Systems and Governance, Netherlands; email: giuliano.dibaldassarre@geo.uu.se	2020	20	1			5	10.1007/s10113-020-01600-1			Scopus
Singh R., Mishra V., Narasimhan B., Ghosh S., Sharma A., Dutta S., Mujumdar P.P.	Hydrological modeling in India	Proceedings of the Indian National Science Academy	International Association of Hydrologic Sciences; Modeling; Transformations	Human alteration of the natural environment continues nearly unabated in many parts of the world. This has resulted in exploitation of natural resources including water, over and above their limits of natural replenishment. Therefore, the International Association of Hydrologic Sciences (IAHS) has dedicated the decade 2013-2022 to explore the interactions between human society and hydrology. Due …	Mujumdar, P.P.; Indian Institute of ScienceIndia; email: ppmujumdar@gmail.com	2020	86	1	479	494		10.16943/ptinsa/2020/49802			Scopus
Zhao W., Ding J., Wang Y., Jia L., Cao W., Tarolli P.	Ecological water conveyance drives human-water system evolution in the Heihe watershed, China	Environmental Research	Ecological restoration; Ecological water conveyance; Heihe river; Human-water system; Hypothesis of disturbance effect transmutation; Sociohydrology; Water resources management	Watersheds are coupled with human-water systems where human, and water resources interact and coevolve with each other. Restoration management not only affects the ecosystem itself but also alters the mutual feedback relationship between humans and water, resulting in additional effects and impeding the ecological restoration process. Taking the lower reaches of the Heihe River as an example (Inn…	Zhao, W.; State Key Laboratory of Earth Surface Processes and Resource Ecology, China; email: zhaoww@bnu.edu.cn	2020	182				109009	10.1016/j.envres.2019.109009			Scopus
Al-Maktoumi A., Zekri S., El-Rawy M., Abdalla O., Al-Abri R., Triki C., Bazargan‐Lari M.R.	Aquifer storage and recovery, and managed aquifer recharge of reclaimed water for management of coastal aquifers	Desalination and Water Treatment		The hydrological and economic feasibility of aquifer storage and recovery (ASR) of excess desali-nated water and managed aquifer recharge (MAR) using tertiary treated wastewater (TTWW) to manage stressed coastal aquifers in Oman has been studied numerically using the code, MODFLOW 2005 and the different transport packages MT3DMS, and MODPATH. The current ASR study aims to assess the feasibility o…	Al-Maktoumi, A.; Sultan Qaboos University, P.O. Box 34, Alkhoud 123, Oman; email: ali4530@squ.edu.om	2020	176		67	77		10.5004/dwt.2020.25499			Scopus
Khalifa M., Elagib N.A., Ahmed B.M., Ribbe L., Schneider K.	Exploring socio-hydrological determinants of crop yield in under-performing irrigation schemes: pathways for sustainable intensification	Hydrological Sciences Journal	Gezira Irrigation Scheme; productivity gap; regression tree; remote sensing; socio-hydrology; sustainable intensification	Understanding the human–water–food–climate nexus is central to achieving sustainable intensification (SI) in agriculture. This research uses a socio-hydrological approach to understand the underpinning for implementing SI in the Gezira Irrigation Scheme, Sudan, by integrating vegetation indices derived from remote sensing, ancillary, gridded soil and precipitation data, supplemented by interviews…	Khalifa, M.; Institute for Technology and Resources Management in the Tropics and Subtropics (ITT), Germany; email: mkhalifa@smail.uni-koeln.de	2020	65	2	153	168		10.1080/02626667.2019.1688333			Scopus
Han Y., Huang Q., He C., Fang Y., Wen J., Gao J., Du S.	The growth mode of built-up land in floodplains and its impacts on flood vulnerability	Science of the Total Environment	Flood risk management; Nature-based adaptation; Socio-hydrology; Urban planning; Urban sustainability	Built-up land in floodplains (BLF) is a vital indicator of the socio-hydrological system, and its dynamics are key to understanding and managing flood risk. However, previous studies have neglected the impacts of BLF growth modes (e.g., patch sizes and expansion types) on flood vulnerability. This paper fills this gap by assessing the BLF's growth modes and revealing their divergent impacts on fl…	Du, S.; School of Environmental and Geographical Sciences/Institute of Urban Study, No. 100, Guilinlu Road, Xuhui District, China; email: shiqiangdu@shnu.edu.cn	2020	700				134462	10.1016/j.scitotenv.2019.134462			Scopus
Ridolfi E., Albrecht F., Di Baldassarre G.	Exploring the role of risk perception in influencing flood losses over time	Hydrological Sciences Journal	cultural theory; flood risk; resilience; risk awareness; socio-hydrology	What implications do societies’ risk perceptions have for flood losses? This study uses a stylized, socio-hydrological model to simulate the mutual feedbacks between human societies and flood events. It integrates hydrological modelling with cultural theory and proposes four ideal types of society that reflect existing dominant risk perception and management: risk neglecting, risk monitoring, ris…	Ridolfi, E.; Department of Earth Sciences, Sweden; email: elena.ridolfi@geo.uu.se	2020	65	1	12	20		10.1080/02626667.2019.1677907			Scopus
Yu D.J., Chang H., Davis T.T., Hillis V., Marston L.T., Oh W.S., Sivapalan M., Waring T.M.	Socio-hydrology: An interplay of design and self-organization in a multilevel world	Ecology and Society	Coupled human-water system; Cultural evolution; Cultural multilevel selection; Robustness; Robustness-fragility trade-offs; Socio-hydrology; The levee effect	The emerging field of socio-hydrology is a special case of social-ecological systems research that focuses on coupled human-water systems, exploring how the hydrologic cycle and human cultural traits coevolve and how such coevolutions lead to phenomena of relevance to water security and sustainability. As such, most problems tackled by socio-hydrology involve some aspects of engineering design, s…		2020	25	4	1	16	22	10.5751/ES-11887-250422			Scopus
Basel B., Hernández Quiroz N., Velasco Herrera R., Santiago Alonso C., Hoogesteger J.	Bee mietii rak rkabni nis (The people know how to seed water): A Zapotec experience in adapting to water scarcity and drought	Climate and Development	climate change; collective action; community-based adaptation; drought; indigenous knowledge; managed aquifer recharge; Mexico; Sociohydrology; water security	We are facing a global water crisis exacerbated by hydro-climatic extremes related to climate change. Water scarcity is expected to increasingly affect indigenous and marginalized populations. Supporting the sovereignty of indigenous and rural populations to create water secure futures through place-based knowledge, local management, and Community-based Adaptation (CBA) measures may help tackle t…	Basel, B.; EcothropicUnited States; email: brittbasel@ecothropic.com	2020						10.1080/17565529.2020.1855100			Scopus
Sultana P., Thompson P.M., Wesselink A.	Coping and resilience in riverine Bangladesh	Environmental Hazards	Bangladesh; erosion; flood; infrastructure; migration; socio-hydrology	This paper investigates the impacts of two successive years of severe floods on households, their coping strategies and resilience to riverine hazards in northern Bangladesh. Based on focus groups and interviews with the same households after floods in 2016 and 2017, we found a cumulative decline in assets through sale of livestock and borrowing, and almost all households evacuated short term to …	Sultana, P.; Flood Hazard Research Centre, The Burroughs, Hendon, United Kingdom; email: parvin@agni.com	2020	19	1	70	89		10.1080/17477891.2019.1665981			Scopus
Mariano D.J.K., Alves C.M.A.	The application of role-playing games and agent-based modelling to the collaborative water management in peri-urban communities [A aplicação de jogos de rpg e modelagem baseada em agentes para o gerenciamento colaborativo da água em comunidades peri-urbanas]	Revista Brasileira de Recursos Hidricos	Role-playing game; Rural settlement; Socio-hydrology	The environmental systems associated with water resources management have always been represented through physical factors and processes. In order to consider the social system coupled with the environmental system, a new modeling approach emerges, the agent-based modeling. Two steps are essential to build agent-based models-ABMs. The first step requires the agent behavior understanding and consi…		2020	25		1	14	e25	10.1590/2318-0331.252020190100			Scopus
Rijneveld R., Marhaento H.	Stakeholders’ contradicting perceptions on the effects of agroforestry and monocropping systems on water use	Water Practice and Technology	Agroforestry; Q methodology; Sociohydrology; Stakeholder perceptions; Water use	The involvement of stakeholders in forest management decisions is crucial to the success of these programmes. Consequently, understanding stakeholders’ perceptions is relevant for adequate management and development. In this study, the perceptions of key stakeholders are identified and compared concerning the effects of agrofor-estry and monocropping systems on water use in the farmlands of the G…	Marhaento, H.; Faculty of Forestry, Indonesia; email: marhaento@ugm.ac.id	2020	15	2	365	373		10.2166/wpt.2020.024			Scopus
Lopez-Alvarez B., Urbano-Peña M.A., Moran-Ramírez J., Ramos-Leal J.A., Tuxpan-Vargas J.	Estimation of the environment component of the Water Poverty Index via remote sensing in semi-arid zones	Hydrological Sciences Journal	CIgreen; foliar area index (LAI); normalized difference vegetation index (NDVI); resource; socio-hydrology; soil adjusted vegetation index (SAVI); water poverty index environment	Groundwater has become an alternative water supply for various sectors of the population and the economy, and its extraction is increasing worldwide. The water poverty index (WPI) is a holistic tool that enables the establishment of links between poverty, social marginalization, environmental integrity, water availability and health. The index includes five components–water resources, access, cap…	Lopez-Alvarez, B.; Water and Society Programme, Mexico; email: briseida.lopez@colsan.edu.mx	2020	65	16	2647	2657		10.1080/02626667.2020.1839081			Scopus
York A.M., Eakin H., Bausch J.C., Smith-Heisters S., Anderies J.M., Aggarwal R., Leonard B., Wright K.	Agricultural water governance in the desert: Shifting risks in central Arizona	Water Alternatives	Arizona; Climate change; Colorado river; Drought; Governance; Irrigated agriculture	In Arizona, the policy debates over the Colorado River Basin Drought Contingency Plans exposed long-running tensions surrounding how we use and value scarce water resources in a desert. These negotiations also highlighted generations-old disputes between indigenous communities' water rights and Anglo settlers. This paper explores how irrigators respond to, and participate in, the crafting of inst…		2020	13	2	418	445					Scopus

## Sheet: 2-Screening
2-Screening
Code: Duplicate: [0 =no duplicate; 1 =WoS; 2 =Scopus; 3= Duplicate in Scopus] // Title+Abstract: [1=include; 0=exclude] // Available: [1=yes; 0=no] // Full text screening: [1=include; 0=exclude// Classification: [1=yes; 0=no]
																					Type of study			Country of the study																			Socio-hydrology concept			Type of natural hazards
Duplicate	Title+Abstract Screening	Articles retrieved	Full text screening	ID	Authors	Article Title	Source Title	Author Keywords	Abstract	Email Addresses	Publication Year	Volume	Issue	Start Page	End Page	Article Number	DOI	WoS Categories	Research Areas	Fonte	Case study	Hypothetical study	Review/ Opinion	Brazil	Bangladesh	India	Caribbean island of Sint Maarten	Italy	Ireland	Sudan	USA	Mexico	Germany	Greece	China	Indonesia	Iran	Maya civilization	Australia	Japan	Costa Rica	Not applicable	Reference to Sivapalan's SH (2012)	Not defined	Define/ propose concept	Flood	Flash flood	Riverine flood	Ponding (pluvial flood)
2					Montanari A., Young G., Savenije H.H.G., Hughes D., Wagener T., Ren L.L., Koutsoyiannis D., Cudennec C., Toth E., Grimaldi S., Blöschl G., Sivapalan M., Beven K., Gupta H., Hipsey M., Schaefli B., Arheimer B., Boegh E., Schymanski S.J., Di Baldassarre G., Yu B., Hubert P., Huang Y., Schumann A., Post D.A., Srinivasan V., Harman C., Thompson S., Rogger M., Viglione A., McMillan H., Characklis G., …	"Panta Rhei-Everything Flows": Change in hydrology and society-The IAHS Scientific Decade 2013-2022	Hydrological Sciences Journal	change; environment; hydrology; IAHS decade; socio-hydrology	The new Scientific Decade 2013-2022 of IAHS, entitled "Panta Rhei-Everything Flows", is dedicated to research activities on change in hydrology and society. The purpose of Panta Rhei is to reach an improved interpretation of the processes governing the water cycle by focusing on their changing dynamics in connection with rapidly changing human systems. The practical aim is to improve our capabili…	Montanari, A.; Department DICAM, , Bologna, Italy; email: alberto.montanari@unibo.it	2013	58	6	1256	1275		10.1080/02626667.2013.809088			Scopus
1	0				Montanari, A; Young, G; Savenije, HHG; Hughes, D; Wagener, T; Ren, LL; Koutsoyiannis, D; Cudennec, C; Toth, E; Grimaldi, S; Bloschl, G; Sivapalan, M; Beven, K; Gupta, H; Hipsey, M; Schaefli, B; Arheimer, B; Boegh, E; Schymanski, S; Di Baldassarre, G; Yu, B; Hubert, P; Huang, Y; Schumann, A; Post, DA; Srinivasan, V; Harman, C; Thompson, S; Rogger, M; Viglione, A; McMillan, H; Characklis, G; Pang, …	"Panta Rhei-Everything Flows": Change in hydrology and society-The IAHS Scientific Decade 2013-2022	HYDROLOGICAL SCIENCES JOURNAL-JOURNAL DES SCIENCES HYDROLOGIQUES	hydrology; environment; socio-hydrology; change; IAHS decade	The new Scientific Decade 2013-2022 of IAHS, entitled Panta RheiEverything Flows, is dedicated to research activities on change in hydrology and society. The purpose of Panta Rhei is to reach an improved interpretation of the processes governing the water cycle by focusing on their changing dynamics in connection with rapidly changing human systems. The practical aim is to improve our capability …	alberto.montanari@unibo.it	2013	58	6	1256	1275		10.1080/02626667.2013.809088	Water Resources	Water Resources	WoS
2					Lei X., Zhao J., Wang D., Sivapalan M.	A Budyko-type model for human water consumption	Journal of Hydrology	Budyko equation; Human water consumption; Optimality; Socio-hydrology; Water management	Budyko-type models in hydrology are simple but efficient descriptions of the vegetation-mediated hydrologic cycle in catchments. Based on hypothesized similarities between vegetation and human water consumption interactions in terms of water demand, constraints, and system functioning as well as catchment processes and outcomes, a corresponding Budyko-type framework is proposed here for human wat…	Zhao, J.; State Key Laboratory of Hydro-Science and Engineering, China; email: zhaojianshi@tsinghua.edu.cn	2018	567		212	226		10.1016/j.jhydrol.2018.10.021			Scopus
1	0				Lei, XW; Zhao, JS; Wang, DB; Sivapalan, M	A Budyko-type model for human water consumption	JOURNAL OF HYDROLOGY	Socio-hydrology; Budyko equation; Human water consumption; Optimality; Water management	Budyko-type models in hydrology are simple but efficient descriptions of the vegetation-mediated hydrologic cycle in catchments. Based on hypothesized similarities between vegetation and human water consumption interactions in terms of water demand, constraints, and system functioning as well as catchment processes and outcomes, a corresponding Budyko-type framework is proposed here for human wat…	zhaojianshi@tsinghua.edu.cn	2018	567		212	226		10.1016/j.jhydrol.2018.10.021	Engineering, Civil; Geosciences, Multidisciplinary; Water Resources	Engineering; Geology; Water Resources	WoS
2					Liu D., Tian F., Lin M., Sivapalan M.	A conceptual socio-hydrological model of the co-evolution of humans and water: Case study of the Tarim River basin, western China	Hydrology and Earth System Sciences		The complex interactions and feedbacks between humans and water are critically important issues but remain poorly understood in the newly proposed discipline of socio-hydrology (Sivapalan et al., 2012). An exploratory model with the appropriate level of simplification can be valuable for improving our understanding of the co-evolution and self-organization of socio-hydrological systems driven by …	Tian, F.; Department of Hydraulic Engineering, State Key Laboratory of Hydroscience and Engineering, Tsinghua UniversityChina	2015	19	2	1035	1054		10.5194/hess-19-1035-2015			Scopus
1	0				Liu, D; Tian, F; Lin, M; Sivapalan, M	A conceptual socio-hydrological model of the co-evolution of humans and water: case study of the Tarim River basin, western China	HYDROLOGY AND EARTH SYSTEM SCIENCES		The complex interactions and feedbacks between humans and water are critically important issues but remain poorly understood in the newly proposed discipline of socio-hydrology (Sivapalan et al., 2012). An exploratory model with the appropriate level of simplification can be valuable for improving our understanding of the co-evolution and self-organization of socio-hydrological systems driven by …	tianfq@tsinghua.edu.cn	2015	19	2	1035	1054		10.5194/hess-19-1035-2015	Geosciences, Multidisciplinary; Water Resources	Geology; Water Resources	WoS
2					Abebe Y.A., Ghorbani A., Nikolic I., Vojinovic Z., Sanchez A.	A coupled flood-agent-institution modelling (CLAIM) framework for urban flood risk management	Environmental Modelling and Software	Agent-based modelling; Coupled human-flood systems; Flood risk management; Institutions; Socio-hydrology; Urban flood modelling	In this paper, we describe a modelling framework that allows the integration of human and physical components of flood risk. Within this framework, flood risk management is conceptualized as a coupled human-flood system. The human subsystem includes individuals and their behaviour and institutions that shape human-flood interaction. The framework presents a dynamic integration between agent-based…	Abebe, Y.A.; Environmental Engineering and Water Technology Department, Westvest 7, Netherlands; email: y.abebe@un-ihe.org	2019	111		483	492		10.1016/j.envsoft.2018.10.015			Scopus
1	1	1	1	1	Abebe, YA; Ghorbani, A; Nikolic, I; Vojinovic, Z; Sanchez, A	A coupled flood-agent-institution modelling (CLAIM) framework for urban flood risk management	ENVIRONMENTAL MODELLING & SOFTWARE	Coupled human-flood systems; Socio-hydrology; Institutions; Agent-based modelling; Flood risk management; Urban flood modelling	In this paper, we describe a modelling framework that allows the integration of human and physical components of flood risk. Within this framework, flood risk management is conceptualized as a coupled human-flood system. The human subsystem includes individuals and their behaviour and institutions that shape human-flood interaction. The framework presents a dynamic integration between agent-based…	y.abebe@un-ihe.org	2019	111		483	492		10.1016/j.envsoft.2018.10.015	Computer Science, Interdisciplinary Applications; Engineering, Environmental; Environmental Sciences; Water Resources	Computer Science; Engineering; Environmental Sciences & Ecology; Water Resources	WoS	1	0	0	0	0	0	1	0	0	0	0	0	0	0	0	0	0	0	0	0	0	0	1	0	0	0	0	0	0
2					Di Pelino S., Schuster-Wallace C., Hynds P.D., Dickson-Anderson S.E., Majury A.	A coupled-systems framework for reducing health risks associated with private drinking water wells	Canadian Water Resources Journal		Privately owned wells are vulnerable to contamination and as such pose a significant public health threat to those who rely on them for domestic water use. While a myriad of studies have sought to individually examine well water quality or the stewardship behaviours among well owners and users, few have effectively explored the intersection between private groundwater contamination and human beha…	Majury, A.; Public Health Ontario, 181 Barrie Street, Canada; email: anna.majury@oahpp.ca	2019	44	3	280	290		10.1080/07011784.2019.1581663			Scopus
1	0				Di Pelino, S; Schuster-Wallace, C; Hynds, PD; Dickson-Anderson, SE; Majury, A	A coupled-systems framework for reducing health risks associated with private drinking water wells	CANADIAN WATER RESOURCES JOURNAL		Privately owned wells are vulnerable to contamination and as such pose a significant public health threat to those who rely on them for domestic water use. While a myriad of studies have sought to individually examine well water quality or the stewardship behaviours among well owners and users, few have effectively explored the intersection between private groundwater contamination and human beha…	anna.majury@oahpp.ca	2019	44	3	280	290		10.1080/07011784.2019.1581663	Water Resources	Water Resources	WoS
0	0				Srinivasan V., Konar M., Sivapalan M.	A dynamic framework for water security	Water Security	Dynamic framework; Human-water systems; IWRM; Regime shifts; Socio-hydrology; Sustainable development goals; Water security	Water security is a multi-faceted problem, going beyond mere balancing of supply and demand. Early attempts to quantify water security relied on static index based approaches that failed to acknowledge that human action is intrinsic to the water cycle. Human adaptation to environmental change and increasing spatial specialization in the modern world necessitate a more flexible and dynamic view of…	Srinivasan, V.; Centre for Environment and Development, India; email: veena.srinivasan@gmail.com	2017	1		12	20		10.1016/j.wasec.2017.03.001			Scopus
2					Hunter C., Gironás J., Bolster D., Karavitis C.A.	A dynamic, multivariate sustainability measure for robust analysis of water management under climate and demand uncertainty in an arid environment	Water (Switzerland)	Arid zone hydrology; Climate change; Groundwater; Predicative modeling; Sociohydrology; Sustainability assessment; System analysis; Vulnerability; Water supply; Watershed modeling	Considering water resource scarcity and uncertainty in climate and demand futures, decision-makers require techniques for sustainability analysis in resource management. Through unclear definitions of "sustainability", however, traditional indices for resource evaluation propose options of limited flexibility by adopting static climate and demand scenarios, limiting analysis variables to a partic…	Hunter, C.; Departamento de Ingeniería Hidráulica y Ambiental, Av. Vicuña Mackenna, Chile; email: ckhunter@uc.cl	2015	7	11	5928	5958		10.3390/w7115928			Scopus
1	0				Hunter, C; Gironas, J; Bolster, D; Karavitis, CA	A Dynamic, Multivariate Sustainability Measure for Robust Analysis of Water Management under Climate and Demand Uncertainty in an Arid Environment	WATER	sustainability assessment; arid zone hydrology; watershed modeling; groundwater; water supply; system analysis; predicative modeling; climate change; sociohydrology; vulnerability	Considering water resource scarcity and uncertainty in climate and demand futures, decision-makers require techniques for sustainability analysis in resource management. Through unclear definitions of sustainability, however, traditional indices for resource evaluation propose options of limited flexibility by adopting static climate and demand scenarios, limiting analysis variables to a particul…	ckhunter@uc.cl; jgironas@ing.puc.cl; dbolster@nd.edu; ckaravitis@aua.gr	2015	7	11	5928	5958		10.3390/w7115928	Environmental Sciences; Water Resources	Environmental Sciences & Ecology; Water Resources	WoS
1	0				Ertsen, MW; Murphy, JT; Purdue, LE; Zhu, T	A journey of a thousand miles begins with one small step - human agency, hydrological processes and time in socio-hydrology	HYDROLOGY AND EARTH SYSTEM SCIENCES		When simulating social action in modeling efforts, as in socio-hydrology, an issue of obvious importance is how to ensure that social action by human agents is well-represented in the analysis and the model. Generally, human decision-making is either modeled on a yearly basis or lumped together as collective social structures. Both responses are problematic, as human decision-making is more compl…	m.w.ertsen@tudelft.nl	2014	18	4	1369	1382		10.5194/hess-18-1369-2014	Geosciences, Multidisciplinary; Water Resources	Geology; Water Resources	WoS
2					Ertsen M.W., Murphy J.T., Purdue L.E., Zhu T.	A journey of a thousand miles begins with one small step-human agency, hydrological processes and time in socio-hydrology	Hydrology and Earth System Sciences		When simulating social action in modeling efforts, as in socio-hydrology, an issue of obvious importance is how to ensure that social action by human agents is well-represented in the analysis and the model. Generally, human decision-making is either modeled on a yearly basis or lumped together as collective social structures. Both responses are problematic, as human decision-making is more compl…	Ertsen, M.W.; Delft University of Technology, Water Resources Department, Delft, Netherlands; email: m.w.ertsen@tudelft.nl	2014	18	4	1369	1382		10.5194/hess-18-1369-2014			Scopus
2					Elshafei Y., Coletti J.Z., Sivapalan M., Hipsey M.R.	A model of the socio-hydrologic dynamics in a semiarid catchment: Isolating feedbacks in the coupled human-hydrology system	Water Resources Research	catchment systems model; coupled system feedbacks; land use change; socio-hydrology; water resources management	The challenge of sustainable freshwater management requires identification and characterization of the underlying components and dynamic interactions within the coupled human-hydrology system. This paper builds a model that captures the dynamic water balance evolution and coupled human response within the Lake Toolibin catchment in West Australia's wheatbelt region. Two subcatchments in different…	Elshafei, Y.; School of Earth and Environment, University of Western AustraliaAustralia	2015	51	8	6442	6471		10.1002/2015WR017048			Scopus
1	0				Elshafei, Y; Coletti, JZ; Sivapalan, M; Hipsey, MR	A model of the socio-hydrologic dynamics in a semiarid catchment: Isolating feedbacks in the coupled human-hydrology system	WATER RESOURCES RESEARCH		The challenge of sustainable freshwater management requires identification and characterization of the underlying components and dynamic interactions within the coupled human-hydrology system. This paper builds a model that captures the dynamic water balance evolution and coupled human response within the Lake Toolibin catchment in West Australia's wheatbelt region. Two subcatchments in different…	yasmina.elshafei@research.uwa.edu.au	2015	51	8	6442	6471		10.1002/2015WR017048	Environmental Sciences; Limnology; Water Resources	Environmental Sciences & Ecology; Marine & Freshwater Biology; Water Resources	WoS
2					Elshafei Y., Sivapalan M., Tonts M., Hipsey M.R.	A prototype framework for models of socio-hydrology: Identification of key feedback loops and parameterisation approach	Hydrology and Earth System Sciences		It is increasingly acknowledged that, in order to sustainably manage global freshwater resources, it is critical that we better understand the nature of human-hydrology interactions at the broader catchment system scale. Yet to date, a generic conceptual framework for building models of catchment systems that include adequate representation of socioeconomic systems - and the dynamic feedbacks bet…	Elshafei, Y.; School of Earth and Environment, University of Western Australia, Crawley WA 6009, Australia; email: yasmina.elshafei@research.uwa.edu.au	2014	18	6	2141	2166		10.5194/hess-18-2141-2014			Scopus
1	0				Elshafei, Y; Sivapalan, M; Tonts, M; Hipsey, MR	A prototype framework for models of socio-hydrology: identification of key feedback loops and parameterisation approach	HYDROLOGY AND EARTH SYSTEM SCIENCES		It is increasingly acknowledged that, in order to sustainably manage global freshwater resources, it is critical that we better understand the nature of human-hydrology interactions at the broader catchment system scale. Yet to date, a generic conceptual framework for building models of catchment systems that include adequate representation of socioeconomic systems - and the dynamic feedbacks bet…	yasmina.elshafei@research.uwa.edu.au	2014	18	6	2141	2166		10.5194/hess-18-2141-2014	Geosciences, Multidisciplinary; Water Resources	Geology; Water Resources	WoS
2					Garcia M., Portney K., Islam S.	A question driven socio-hydrological modeling process	Hydrology and Earth System Sciences		Human and hydrological systems are coupled: human activity impacts the hydrological cycle and hydrological conditions can, but do not always, trigger changes in human systems. Traditional modeling approaches with no feedback between hydrological and human systems typically cannot offer insight into how different patterns of natural variability or human-induced changes may propagate through this c…	Garcia, M.; Civil and Environmental Engineering Department, 200 College Avenue, United States; email: margaret.garcia@tufts.edu	2016	20	1	73	92		10.5194/hess-20-73-2016			Scopus
3	0				Garcia M., Portney K., Islam S.	A question driven socio-hydrological modeling process	Hydrology and Earth System Sciences Discussions		Human and hydrological systems are coupled: human activity impacts the hydrological cycle and hydrological conditions can, but do not always, trigger changes in human systems. Traditional modeling approaches with no feedback between hydrological and human systems typically cannot offer insight into how different patterns of natural variability or human induced changes may propagate through this c…	Garcia, M.; Civil and Environmental Engineering Department, 200 College Avenue, United States	2015	12	8	8289	8335		10.5194/hessd-12-8289-2015			Scopus
1	0				Garcia, M; Portney, K; Islam, S	A question driven socio-hydrological modeling process	HYDROLOGY AND EARTH SYSTEM SCIENCES		Human and hydrological systems are coupled: human activity impacts the hydrological cycle and hydrological conditions can, but do not always, trigger changes in human systems. Traditional modeling approaches with no feedback between hydrological and human systems typically cannot offer insight into how different patterns of natural variability or human-induced changes may propagate through this c…	margaret.garcia@tufts.edu	2016	20	1	73	92		10.5194/hess-20-73-2016	Geosciences, Multidisciplinary; Water Resources	Geology; Water Resources	WoS
1	0				Orduña Alegría, MEO; Schutze, N; Zipper, SC	A Serious Board Game to Analyze Socio-Ecological Dynamics towards Collaboration in Agriculture	SUSTAINABILITY	socio-hydrology; irrigation; serious games; decision-making parameters; agent-based modeling	Climate change exacerbates water scarcity and associated conflicts over water resources. To address said conflicts and achieve sustainable use of water resources in agriculture, further development of socio-ecological adaptations are required. In this study, we evaluate the ability of MAHIZ, a serious board game, to analyze socio-hydrological dynamics related to irrigated agriculture. Gameplay in…	maria_elena.orduna_alegria@tu-dresden.de; niels.schuetze@tu-dresden.de; samzipper@ku.edu	2020	12	13			5301	10.3390/su12135301	Green & Sustainable Science & Technology; Environmental Sciences; Environmental Studies	Science & Technology - Other Topics; Environmental Sciences & Ecology	WoS
2					Orduña Alegría M.E., Schütze N., Zipper S.C.	A serious board game to analyze socio-ecological dynamics towards collaboration in agriculture	Sustainability (Switzerland)	Agent-based modeling; Decision-making parameters; Irrigation; Serious games; Socio-hydrology	Climate change exacerbates water scarcity and associated conflicts over water resources. To address said conflicts and achieve sustainable use of water resources in agriculture, further development of socio-ecological adaptations are required. In this study, we evaluate the ability of MAHIZ, a serious board game, to analyze socio-hydrological dynamics related to irrigated agriculture. Gameplay in…	Orduña Alegría, M.E.; Institute of Hydrology and Meteorology, Germany; email: maria_elena.orduna_alegria@tu-dresden.de	2020	12	13			5301	10.3390/su12135301			Scopus
2					Baker T.J., Cullen B., Debevec L., Abebe Y.	A socio-hydrological approach for incorporating gender into biophysical models and implications for water resources research	Applied Geography	Ecosystem services; Ethiopia; Participatory mapping; SWAT; Women	Men and women interact with water resources and landscapes in different ways, and there are frequent criticisms that little research is undertaken across disciplines to address this issue. Biophysical scientists in particular struggle with how to integrate "gendered" water uses into models that are necessarily based on prevailing laws and equations that describe the movement of water through the …	Baker, T.J.; IWMI-East Africa and Nile Basin, C/o ILRI, P.O. Box 5689, Ethiopia	2015	62		325	338		10.1016/j.apgeog.2015.05.008			Scopus
1	0				Baker, TJ; Cullen, B; Debevec, L; Abebe, Y	A socio-hydrological approach for incorporating gender into biophysical models and implications for water resources research	APPLIED GEOGRAPHY	Participatory mapping; Ethiopia; Women; SWAT; Ecosystem services	Men and women interact with water resources and landscapes in different ways, and there are frequent criticisms that little research is undertaken across disciplines to address this issue. Biophysical scientists in particular struggle with how to integrate gendered water uses into models that are necessarily based on prevailing laws and equations that describe the movement of water through the hy…	T.Baker@cgiar.org	2015	62		325	338		10.1016/j.apgeog.2015.05.008	Geography	Geography	WoS
2					Pande S., Savenije H.H.G.	A sociohydrological model for smallholder farmers in Maharashtra, India	Water Resources Research	smallholder; sociohydrology	We present a sociohydrological model that can help us to better understand the system dynamics of a smallholder farmer. It couples the dynamics of the six main assets of a typical smallholder farmer: water storage capacity, capital, livestock, soil fertility, grazing access, and labor. The hydroclimatic variability, which is a main driver and source of uncertainty of the smallholder system, is ac…	Pande, S.; Department of Water Management, Netherlands; email: s.pande@tudelft.nl	2016	52	3	1923	1947		10.1002/2015WR017841			Scopus
1	0				Pande, S; Savenije, HHG	A sociohydrological model for smallholder farmers in Maharashtra, India	WATER RESOURCES RESEARCH	smallholder; sociohydrology	We present a sociohydrological model that can help us to better understand the system dynamics of a smallholder farmer. It couples the dynamics of the six main assets of a typical smallholder farmer: water storage capacity, capital, livestock, soil fertility, grazing access, and labor. The hydroclimatic variability, which is a main driver and source of uncertainty of the smallholder system, is ac…	s.pande@tudelft.nl	2016	52	3	1923	1947		10.1002/2015WR017841	Environmental Sciences; Limnology; Water Resources	Environmental Sciences & Ecology; Marine & Freshwater Biology; Water Resources	WoS
2					Sarmiento F.O., Kooperman G.J.	A Socio-Hydrological Perspective on Recent and Future Precipitation Changes Over Tropical Montane Cloud Forests in the Andes	Frontiers in Earth Science	climate change; earth system models; precipitation change; socio-hydrology; Tropandean landscapes; tropical montane cloud forests	[No abstract available]	Sarmiento, F.O.; Neotropical Montology Collaboratory and Climate, United States; email: fsarmien@uga.edu	2019	7				324	10.3389/feart.2019.00324			Scopus
1	0				Sarmiento, FO; Kooperman, GJ	A Socio-Hydrological Perspective on Recent and Future Precipitation Changes Over Tropical Montane Cloud Forests in the Andes	FRONTIERS IN EARTH SCIENCE	tropical montane cloud forests; precipitation change; socio-hydrology; Tropandean landscapes; earth system models; climate change		fsarmien@uga.edu	2019	7				324	10.3389/feart.2019.00324	Geosciences, Multidisciplinary	Geology	WoS
0	1	1	0		Thompson, S; MacVean, L; Sivapalan, M	A Stochastic Water Balance Framework for Lowland Watersheds	WATER RESOURCES RESEARCH	lowlands; water balance; flood; stochastic; analytic; levee	The water balance dynamics in lowland watersheds are influenced not only by local hydroclimatic controls on energy and water availability, but also by imports of water from the upstream watershed. These imports result in a stochastic extent of inundation in lowland watersheds that is determined by the local flood regime, watershed topography, and the rate of loss processes such as drainage and ev…	sally.thompson@berkeley.edu	2017	53	11	9564	9579		10.1002/2017WR021193	Environmental Sciences; Limnology; Water Resources	Environmental Sciences & Ecology; Marine & Freshwater Biology; Water Resources	WoS	1	0	0	0	0	0	0	0	0	0	1	0	0	0	0	0	0	0	0	0	0	0	0	0	1	1	0	0	0
2					Jeong H., Adamowski J.	A system dynamics based socio-hydrological model for agricultural wastewater reuse at the watershed scale	Agricultural Water Management	Korea; Socio-hydrological modeling; Socio-hydrology; System dynamics modeling; Urbanization; Wastewater reuse	The purpose of this study was to develop and verify a socio-hydrological model using system dynamics (SD), thereby combining a deterministic conceptual hydrological model and a social model incorporating population, land use, economics, technology, and policy dimensions. Applied to a central South Korean watershed where wastewater is reused for paddy irrigation, the present model was verified in …	Adamowski, J.; Department of Bioresource Engineering, 21 111 Lakeshore Road, Canada; email: jan.adamowski@mcgill.ca	2016	171		89	107		10.1016/j.agwat.2016.03.019			Scopus
1	0				Jeong, H; Adamowski, J	A system dynamics based socio-hydrological model for agricultural wastewater reuse at the watershed scale	AGRICULTURAL WATER MANAGEMENT	System dynamics modeling; Korea; Socio-hydrology; Socio-hydrological modeling; Urbanization; Wastewater reuse	The purpose of this study was to develop and verify a socio-hydrological model using system dynamics (SD), thereby combining a deterministic conceptual hydrological model and a social model incorporating population, land use, economics, technology, and policy dimensions. Applied to a central South Korean watershed where wastewater is reused for paddy irrigation, the present model was verified in …	jan.adamowski@mcgill.ca	2016	171		89	107		10.1016/j.agwat.2016.03.019	Agronomy; Water Resources	Agriculture; Water Resources	WoS
2					Abadie L.M., Markandya A., Neumann M.B.	Accounting for economic factors in socio-hydrology: Optimization under uncertainty and climate change	Water (Switzerland)	Extreme events; Generalized extreme value distribution; Non-stationarity; Optimization under uncertainty; River flooding	This paper reframes the socio-hydrology analysis as an optimization problem. To achieve this, we first develop a valuation scheme to estimate net benefits of development in a flood plain, consisting of benefits obtained from land and housing, less the costs of flood management and flood damage. Then we look for an optimal safety factor for the levee heightening strategy within the 'Technosociety'…	Markandya, A.; Basque Centre for Climate Change BC3, Sede Building 1, 1st floor, Spain; email: anil.markandya@bc3research.org	2019	11	10			2073	10.3390/w11102073			Scopus
1	1	1	1	2	Abadie, LM; Markandya, A; Neumann, MB	Accounting for Economic Factors in Socio-Hydrology: Optimization under Uncertainty and Climate Change	WATER	river flooding; extreme events; generalized extreme value distribution; non-stationarity; optimization under uncertainty	This paper reframes the socio-hydrology analysis as an optimization problem. To achieve this, we first develop a valuation scheme to estimate net benefits of development in a flood plain, consisting of benefits obtained from land and housing, less the costs of flood management and flood damage. Then we look for an optimal safety factor for the levee heightening strategy within the 'Technosociety'…	lm.abadie@bc3research.org; anil.markandya@bc3research.org; marc.neumann@bc3research.org	2019	11	10			2073	10.3390/w11102073	Environmental Sciences; Water Resources	Environmental Sciences & Ecology; Water Resources	WoS	0	1	0	0	0	0	0	0	0	0	0	0	0	0	0	0	0	0	0	0	0	1	0	0	0	1	0	0	0
2					Lane S.N.	Acting, predicting and intervening in a socio-hydrological world	Hydrology and Earth System Sciences		This paper asks a simple question: if humans and their actions co-evolve with hydrological systems (Sivapalan et al., 2012), what is the role of hydrological scientists, who are also humans, within this system? To put it more directly, as traditionally there is a supposed separation of scientists and society, can we maintain this separation as socio-hydrologists studying a socio-hydrological worl…	Lane, S.N.; Institute of Earth Surface Dynamics, , Lausanne, Switzerland; email: stuart.lane@unil.ch	2014	18	3	927	952		10.5194/hess-18-927-2014			Scopus
1	0				Lane, SN	Acting, predicting and intervening in a socio-hydrological world	HYDROLOGY AND EARTH SYSTEM SCIENCES		This paper asks a simple question: if humans and their actions co-evolve with hydrological systems (Sivapalan et al., 2012), what is the role of hydrological scientists, who are also humans, within this system? To put it more directly, as traditionally there is a supposed separation of scientists and society, can we maintain this separation as socio-hydrologists studying a socio-hydrological worl…	stuart.lane@unil.ch	2014	18	3	927	952		10.5194/hess-18-927-2014	Geosciences, Multidisciplinary; Water Resources	Geology; Water Resources	WoS
0	0				Ceola S., Montanari A., Krueger T., Dyer F., Kreibich H., Westerberg I., Carr G., Cudennec C., Elshorbagy A., Savenije H., Van Der Zaag P., Rosbjerg D., Aksoy H., Viola F., Petrucci G., MacLeod K., Croke B., Ganora D., Hermans L., Polo M.J., Xu Z., Borga M., Helmschrot J., Toth E., Ranzi R., Castellarin A., Hurford A., Brilly M., Viglione A., Blöschl G., Sivapalan M., Domeneghetti A., Marinelli A…	Adaptation of water resources systems to changing society and environment: a statement by the International Association of Hydrological Sciences	Hydrological Sciences Journal	bottom-up approach; catchment; resilient design; socio-hydrology; water resources systems	We explore how to address the challenges of adaptation of water resources systems under changing conditions by supporting flexible, resilient and low-regret solutions, coupled with on-going monitoring and evaluation. This will require improved understanding of the linkages between biophysical and social aspects in order to better anticipate the possible future co-evolution of water systems and so…	Ceola, S.; Department of Civil, Italy; email: serena.ceola@unibo.it	2016	61	16	2803	2817		10.1080/02626667.2016.1230674			Scopus
2					Huber L., Bahro N., Leitinger G., Tappeiner U., Strasser U.	Agent-based modelling of a coupled water demand and supply system at the catchment scale	Sustainability (Switzerland)	Agent-based modelling; NetLogo; Resources demand and supply; Socio-hydrology	Water is of uttermost importance for human well-being and a central resource in sustainable development. Many simulation models for sustainable water management, however, lack explanatory and predictive power because the two-way dynamic feedbacks between human and water systems are neglected. With Agent-based Modelling of Resources (Aqua.MORE; here, of the resource water), we present a platform t…	Huber, L.; Department of Ecology, Sternwartestraße 15, Austria; email: Lisa.Huber@uibk.ac.at	2019	11	21			6178	10.3390/su11216178			Scopus
1	0				Huber, L; Bahro, N; Leitinger, G; Tappeiner, U; Strasser, U	Agent-Based Modelling of a Coupled Water Demand and Supply System at the Catchment Scale	SUSTAINABILITY	agent-based modelling; resources demand and supply; socio-hydrology; NetLogo	Water is of uttermost importance for human well-being and a central resource in sustainable development. Many simulation models for sustainable water management, however, lack explanatory and predictive power because the two-way dynamic feedbacks between human and water systems are neglected. With Agent-based Modelling of Resources (Aqua.MORE; here, of the resource water), we present a platform t…	Lisa.Huber@uibk.ac.at; nico.bahro@googlemail.com; Georg.Leitinger@uibk.ac.at; Ulrike.Tappeiner@uibk.ac.at; Ulrich.Strasser@uibk.ac.at	2019	11	21			6178	10.3390/su11216178	Green & Sustainable Science & Technology; Environmental Sciences; Environmental Studies	Science & Technology - Other Topics; Environmental Sciences & Ecology	WoS
2					Bakarji J., O’Malley D., Vesselinov V.V.	Agent-Based Socio-Hydrological Hybrid Modeling for Water Resource Management	Water Resources Management	Computational social dynamics; Decision support systems; Sociohydrology	Hybrid socio-hydrological modeling has become indispensable for managing water resources in an increasingly unstable ecology caused by human activity. Most work on the subject has been focused on either qualitative socio-political recommendations with an unbounded list of vague factors or complex sociological and hydrological models with many assumptions and specialized usability. In this paper, …	Bakarji, J.; Department of Energy Resources Engineering, United States; email: jbakarji@stanford.edu	2017	31	12	3881	3898		10.1007/s11269-017-1713-7			Scopus
1	0				Bakarji, J; O'Malley, D; Vesselinov, VV	Agent-Based Socio-Hydrological Hybrid Modeling for Water Resource Management	WATER RESOURCES MANAGEMENT	Sociohydrology; Decision support systems; Computational social dynamics	Hybrid socio-hydrological modeling has become indispensable for managing water resources in an increasingly unstable ecology caused by human activity. Most work on the subject has been focused on either qualitative socio-political recommendations with an unbounded list of vague factors or complex sociological and hydrological models with many assumptions and specialized usability. In this paper, …	jbakarji@stanford.edu	2017	31	12	3881	3898		10.1007/s11269-017-1713-7	Engineering, Civil; Water Resources	Engineering; Water Resources	WoS
2					Pouladi P., Afshar A., Afshar M.H., Molajou A., Farahmand H.	Agent-based socio-hydrological modeling for restoration of Urmia Lake: Application of theory of planned behavior	Journal of Hydrology	Agent-based model (ABM); Decision-making process; Socio-hydrology; Theory of planned behavior (TPB); Urmia Lake	This study proposes a novel socio-hydrological modeling framework for assessing the performance of complex water resources systems. It employs and integrates agent-based modeling (ABM) and the theory of planned behavior (TPB) into the socio-hydrological modeling framework to account for agents’ behaviors. Due to farmers’ major role in anthropogenic droughts, this paper mainly focuses on farmers’ …	Afshar, A.; School of Civil Eng., Iran; email: a_afshar@iust.ac.ir	2019	576		736	748		10.1016/j.jhydrol.2019.06.080			Scopus
1	0				Pouladi, P; Afshara, A; Afshar, MH; Molajou, A; Farahmand, H	Agent-based socio-hydrological modeling for restoration of Urmia Lake: Application of theory of planned behavior	JOURNAL OF HYDROLOGY	Socio-hydrology; Agent-based model (ABM); Theory of planned behavior (TPB); Decision-making process; Urmia Lake	This study proposes a novel socio-hydrological modeling framework for assessing the performance of complex water resources systems. It employs and integrates agent-based modeling (ABM) and the theory of planned behavior (TPB) into the socio-hydrological modeling framework to account for agents' behaviors. Due to farmers' major role in anthropogenic droughts, this paper mainly focuses on farmers' …	a_afshar@iust.ac.ir	2019	576		736	748		10.1016/j.jhydrol.2019.06.080	Engineering, Civil; Geosciences, Multidisciplinary; Water Resources	Engineering; Geology; Water Resources	WoS
2					York A.M., Eakin H., Bausch J.C., Smith-Heisters S., Anderies J.M., Aggarwal R., Leonard B., Wright K.	Agricultural water governance in the desert: Shifting risks in central Arizona	Water Alternatives	Arizona; Climate change; Colorado river; Drought; Governance; Irrigated agriculture	In Arizona, the policy debates over the Colorado River Basin Drought Contingency Plans exposed long-running tensions surrounding how we use and value scarce water resources in a desert. These negotiations also highlighted generations-old disputes between indigenous communities' water rights and Anglo settlers. This paper explores how irrigators respond to, and participate in, the crafting of inst…		2020	13	2	418	445					Scopus
1	0				York, AM; Eakin, H; Bausch, JC; Smith-Heisters, S; Anderies, JM; Aggarwal, R; Leonard, B; Wright, K	Agricultural Water Governance in the Desert: Shifting Risks in Central Arizona	WATER ALTERNATIVES-AN INTERDISCIPLINARY JOURNAL ON WATER POLITICS AND DEVELOPMENT	Irrigated agriculture; drought; governance; climate change; Colorado River; Arizona	In Arizona, the policy debates over the Colorado River Basin Drought Contingency Plans exposed long-running tensions surrounding how we use and value scarce water resources in a desert. These negotiations also highlighted generations-old disputes between indigenous communities' water rights and Anglo settlers. This paper explores how irrigators respond to, and participate in, the crafting of inst…	abigail.york@asu.edu; hallie.eakin@asu.edu; jcbausch@asu.edu; skaidra.smith-heisters@asu.edu; marty.anderies@asu.edu; aggarwal@asu.edu; bryan.leonard@asu.edu; kewrigh4@asu.edu	2020	13	2	418	445			Environmental Studies; Water Resources	Environmental Sciences & Ecology; Water Resources	WoS
2					Roobavannan M., Kandasamy J., Pande S., Vigneswaran S., Sivapalan M.	Allocating Environmental Water and Impact on Basin Unemployment: Role of A Diversified Economy	Ecological Economics	Agriculture; Diversified economy; Environmental water allocation; Migration; Socio-hydrology; Unemployment	Water diversion for environmental purposes threatens many agricultural communities. This paper focuses on the water-agriculture-environment nexus in the Murrumbidgee River Basin, Australia, and attempts to explain how reduced water allocation to agriculture aimed at protecting the environment in turn impacted the wider economy and the community. Predictably reduced water allocation saw declines i…	Kandasamy, J.; School of Civil and Environmental Engineering, PO BOX 123, Broadway NSW 2007, Australia; email: jaya.kandasamy@uts.edu.au	2017	136		178	188		10.1016/j.ecolecon.2017.02.006			Scopus
1	0				Roobavannan, M; Kandasamy, J; Pande, S; Vigneswaran, S; Sivapalan, M	Allocating Environmental Water and Impact on Basin Unemployment: Role of A Diversified Economy	ECOLOGICAL ECONOMICS	Socio-hydrology; Agriculture; Environmental water allocation; Unemployment; Diversified economy; Migration	Water diversion for environmental purposes threatens many agricultural communities. This paper focuses on the water-agriculture-environment nexus in the Murrumbidgee River Basin, Australia, and attempts to explain how reduced water allocation to agriculture aimed at protecting the environment in turn impacted the wider economy and the community. Predictably reduced water allocation saw declines i…	jaya.kandasamy@uts.edu.au	2017	136		178	188		10.1016/j.ecolecon.2017.02.006	Ecology; Economics; Environmental Sciences; Environmental Studies	Environmental Sciences & Ecology; Business & Economics	WoS
2					Mostert E.	An alternative approach for socio-hydrology: Case study research	Hydrology and Earth System Sciences		Currently the most popular approach in socio hydrology is to develop coupled human–water models. This article proposes an alternative approach, qualitative case study research, involving a systematic review of (1) the human activities affecting the hydrology in the case, (2) the main human actors, and (3) the main factors influencing the actors and their activities. Moreover, this article present…	Mostert, E.; Department Water Management, Stevinweg 1, Netherlands; email: e.mostert@tudelft.nl	2018	22	1	317	329		10.5194/hess-22-317-2018			Scopus
1	0				Mostert, E	An alternative approach for socio-hydrology: case study research	HYDROLOGY AND EARTH SYSTEM SCIENCES		Currently the most popular approach in socio hydrology is to develop coupled human-water models. This article proposes an alternative approach, qualitative case study research, involving a systematic review of (1) the human activities affecting the hydrology in the case, (2) the main human actors, and (3) the main factors influencing the actors and their activities. Moreover, this article present…	e.mostert@tudelft.nl	2018	22	1	317	329		10.5194/hess-22-317-2018	Geosciences, Multidisciplinary; Water Resources	Geology; Water Resources	WoS
2					Jaramillo L.V., Stone M.C., Morrison R.R.	An indicator-based approach to assessing resilience of socio-hydrologic systems in Nepal to hydropower development	Journal of Hydrology		Resilience is essential to the integrity of socio-hydrologic systems, especially when faced with stress caused by natural hazards and economic development. Nepal has seen both in recent years. The objective of this study is to construct and implement an indicator-based approach to assess socio-hydrological systems with new metrics to evaluate the influence of hydropower development. We adopted a …	Jaramillo, L.V.; Department of Civil, United States; email: lvjaramillo@alumni.stanford.edu	2018	563		1111	1118		10.1016/j.jhydrol.2018.05.070			Scopus
1	0				Jaramillo, LV; Stone, MC; Morrison, RR	An indicator-based approach to assessing resilience of socio-hydrologic systems in Nepal to hydropower development	JOURNAL OF HYDROLOGY		Resilience is essential to the integrity of socio-hydrologic systems, especially when faced with stress caused by natural hazards and economic development. Nepal has seen both in recent years. The objective of this study is to construct and implement an indicator-based approach to assess socio-hydrological systems with new metrics to evaluate the influence of hydropower development. We adopted a …	lvjaramillo@alumni.stanford.edu	2018	563		1111	1118		10.1016/j.jhydrol.2018.05.070	Engineering, Civil; Geosciences, Multidisciplinary; Water Resources	Engineering; Geology; Water Resources	WoS
0	1	1	0		Di Baldassarre, G; Nohrstedt, D; Mard, J; Burchardt, S; Albin, C; Bondesson, S; Breinl, K; Deegan, FM; Fuentes, D; Lopez, MG; Granberg, M; Nyberg, L; Nyman, MR; Rhodes, E; Troll, V; Young, S; Walch, C; Parker, CF	An Integrative Research Framework to Unravel the Interplay of Natural Hazards and Vulnerabilities	EARTHS FUTURE	Disaster risk reduction; Natural hazards; Vulnerability; Flood risk; Socio-hydrology	Climate change, globalization, urbanization, social isolation, and increased interconnectedness between physical, human, and technological systems pose major challenges to disaster risk reduction (DRR). Subsequently, economic losses caused by natural hazards are increasing in many regions of the world, despite scientific progress, persistent policy action, and international cooperation. We argue …	giuliano.dibaldassarre@geo.uu.se	2018	6	3	305	310		10.1002/2017EF000764	Environmental Sciences; Geosciences, Multidisciplinary; Meteorology & Atmospheric Sciences	Environmental Sciences & Ecology; Geology; Meteorology & Atmospheric Sciences	WoS	0	0	1
2					Li B., Sivapalan M., Xu X.	An Urban Sociohydrologic Model for Exploration of Beijing's Water Sustainability Challenges and Solution Spaces	Water Resources Research	modeling; sociohydrology; urban hydrology; water sustainability	The mismatch between water demand and water availability in many megacities poses vexing water management challenges. Managers are forced to take remedial efforts to address these challenges, often with a heavy focus on infrastructure solutions such as building reservoirs or interbasin transfers to meet demand, which may in fact exacerbate the problem through unintended consequences that arise fr…	Li, B.; College of Water Sciences, China; email: libin@mail.bnu.edu.cn	2019	55	7	5918	5940		10.1029/2018WR023816			Scopus
1	0				Li, B; Sivapalan, M; Xu, XY	An Urban Sociohydrologic Model for Exploration of Beijing's Water Sustainability Challenges and Solution Spaces	WATER RESOURCES RESEARCH		The mismatch between water demand and water availability in many megacities poses vexing water management challenges. Managers are forced to take remedial efforts to address these challenges, often with a heavy focus on infrastructure solutions such as building reservoirs or interbasin transfers to meet demand, which may in fact exacerbate the problem through unintended consequences that arise fr…	libin@mail.bnu.edu.cn	2019	55	7	5918	5940		10.1029/2018WR023816	Environmental Sciences; Limnology; Water Resources	Environmental Sciences & Ecology; Marine & Freshwater Biology; Water Resources	WoS
0	0				Wu J., Fang W., Hu Z., Hong B.	Application of Bayesian approach to dynamic assessment of flood in urban underground spaces	Water (Switzerland)	Communication; Engagement; Groundwater management; Socio-economic aspects; Socio-hydrogeology	The trouble with groundwater is that despite its critical importance to global water supplies, it frequently attracts insufficient management attention relative to more visible surface water sources, irrespective of regional climate, socioeconomic profile, and regulatory environment. To this end, the recently defined sub-discipline of "socio-hydrogeology", an extension of socio-hydrology, seeks t…	Wu, J.; Department of Safety Technology and Management, China; email: jiansongwu@hotmail.com	2018	10	9			1112	10.3390/w10091112			Scopus
[truncated: 365 more rows]
[truncated: 145 more columns]
