# Supplementary material for: To which extent are socio-hydrology studies truly integrative? The case of natural hazards and disaster research
Source: Copernicus journal article supplement (doi:10.5194/hess-26-2301-2022), 2022-05-02
Supplement: Supplementary file 1 [file hess-26-2301-2022-supplement.zip › Supplementary material-Table S1 S2 and FigS1.pdf]

Supplementary material

Table S1: Search strategy used to identify relevant socio-hydrology and hydrology articles within the Scopus and Web of Science databases.

|                        | Database       | Search terms                                                                                                                                                                                                                                                                                                                                                                                                                       |
|------------------------|----------------|------------------------------------------------------------------------------------------------------------------------------------------------------------------------------------------------------------------------------------------------------------------------------------------------------------------------------------------------------------------------------------------------------------------------------------|
| Socio-hydrology search | Scopus         | (TITLE-ABS ("socio-hydrology" OR "socio-hydrology" OR "socio-hydrological" OR "socio-hydrological" OR "socio-hydrologic" OR "socio-hydrologic") OR AUTHKEY ("socio-hydrology" OR "socio-hydrology" OR "socio-hydrological" OR "socio-hydrological" OR "socio-hydrologic" OR "socio-hydrologic")) AND DOCTYPE (ar) AND (LIMIT-TO (LANGUAGE, "English"))                                                                             |
|                        | Web of Science | (TI=("socio-hydrology" OR "socio-hydrology" OR "socio-hydrological" OR "socio-hydrological" OR "socio-hydrologic" OR "socio-hydrologic")) or (AB=("socio-hydrology" OR "socio-hydrology" OR "socio-hydrological" OR "socio-hydrological" OR "socio-hydrologic" OR "socio-hydrologic"))or (AK=("socio-hydrology" OR "socio-hydrology" OR "socio-hydrological" OR "socio-hydrological" OR "socio-hydrologic" OR "socio-hydrologic")) |
| Hydrology search       | Scopus         | (TITLE-ABS ("hydrology" OR "hydrological" OR "hydrologic") OR AUTHKEY ("hydrology" OR "hydrological" OR "hydrologic")) AND DOCTYPE (ar) AND (LIMIT-TO (LANGUAGE, "English"))                                                                                                                                                                                                                                                       |
|                        | Web of Science | (TI=("hydrology" OR "hydrological" OR "hydrologic")) or (AB=("hydrology" OR "hydrological" OR "hydrologic")) OR (AK=("hydrology" OR "hydrological" OR "hydrologic"))                                                                                                                                                                                                                                                               |

5 **Table S2: Categories considered for classifying the articles.**

| Category                                                        | Sub-categories                                                                                                                                                                                                                                                                                                                                                                                                                                                                    | Goal                                                                                                                                                                                                                                                     |
|-----------------------------------------------------------------|-----------------------------------------------------------------------------------------------------------------------------------------------------------------------------------------------------------------------------------------------------------------------------------------------------------------------------------------------------------------------------------------------------------------------------------------------------------------------------------|----------------------------------------------------------------------------------------------------------------------------------------------------------------------------------------------------------------------------------------------------------|
| Country of the case study                                       | <ul style="list-style-type: none"> <li>▪ All cited in the articles</li> <li>▪ Not applicable</li> </ul>                                                                                                                                                                                                                                                                                                                                                                           | Identify how the studies are distributed across geographic regions (e.g. continents, countries). Not applicable indicates hypothetical studies.                                                                                                          |
| Type of natural hazard investigated                             | <ul style="list-style-type: none"> <li>▪ Flood (Flash flood, Riverine flood, Ponding or pluvial flood, Urban flood, Coastal flood)</li> <li>▪ Wave action</li> <li>▪ Landslide</li> <li>▪ Drought (Hydrological drought, Meteorological drought, Agricultural drought)</li> <li>▪ Wildfire</li> <li>▪ Glacial lake outburst</li> <li>▪ Mass movement</li> <li>▪ Earthquake</li> <li>▪ Volcanic activity</li> <li>▪ Storm</li> <li>▪ Fog</li> <li>▪ Extreme Temperature</li> </ul> | Identify the natural hazards studied. The International Disaster Database (EM-DAT) of the Centre for Research on the Epidemiology of Disaster (CRED) was applied for defining the sub-categories. Biological and extraterrestrial hazards were excluded. |
| Spatial scale of the physical system (a) and social system (b)  | <ul style="list-style-type: none"> <li>▪ Individual/Household (a) (b)</li> <li>▪ Group/Community (a) (b)</li> <li>▪ Municipal (a) (b)</li> <li>▪ River basin (a) (b)</li> <li>▪ Regional (a) (b)</li> <li>▪ National (a) (b)</li> <li>▪ Global (a)</li> <li>▪ International (b)</li> <li>▪ Cross-scale (a) (b)</li> <li>▪ Floodplain (a)</li> <li>▪ Other (a) (b)</li> <li>▪ Undefined** (a) (b)</li> </ul>                                                                       | Identify which spatial scale was considered aiming to uncover similarities and differences between physical and social-spatial scales.                                                                                                                   |
| Temporal scale of the physical system (a) and social system (b) | <ul style="list-style-type: none"> <li>▪ Hour (a) (b)</li> <li>▪ Day (a) (b)</li> <li>▪ Week (a) (b)</li> <li>▪ Month (a) (b)</li> <li>▪ Year (a) (b)</li> <li>▪ Decade (a) (b)</li> <li>▪ Century (a) (b)</li> <li>▪ Event (discrete recurrence) (a)</li> <li>▪ Post-event (b)</li> <li>▪ Other (a) (b)</li> <li>▪ Undefined** (a) (b)</li> </ul>                                                                                                                                | Identify the temporal scale applied for understanding the physical and social systems.                                                                                                                                                                   |

**Table S2 (continued).**

| <b>Category</b>                                                           | <b>Sub-categories</b>                                                                                                                                                                                                                                                                                                                                                                                                                                                                                                                                                                                                                                                                                              | <b>Goal</b>                                                                                                                                   |
|---------------------------------------------------------------------------|--------------------------------------------------------------------------------------------------------------------------------------------------------------------------------------------------------------------------------------------------------------------------------------------------------------------------------------------------------------------------------------------------------------------------------------------------------------------------------------------------------------------------------------------------------------------------------------------------------------------------------------------------------------------------------------------------------------------|-----------------------------------------------------------------------------------------------------------------------------------------------|
| Physical components                                                       | <ul style="list-style-type: none"> <li>▪ Hydrological</li> <li>▪ Meteorological</li> <li>▪ Hydraulic</li> <li>▪ Topographic</li> <li>▪ Other</li> <li>▪ Not applicable*</li> <li>▪ Undefined**</li> </ul>                                                                                                                                                                                                                                                                                                                                                                                                                                                                                                          | Identify the components used for representing the physical system.                                                                            |
| Social components                                                         | <ul style="list-style-type: none"> <li>▪ Societal memory/Risk awareness/Risk perception</li> <li>▪ Experience of prior event</li> <li>▪ Formal institution (norms, laws, rules)</li> <li>▪ Informal institution (local norms/ rules, attitudes)</li> <li>▪ Individual characteristics</li> <li>▪ Demography (Displacement individual/ population)</li> <li>▪ Economy</li> <li>▪ Other</li> <li>▪ Not applicable*</li> <li>▪ Undefined**</li> </ul>                                                                                                                                                                                                                                                                 | Identify the components used for representing the social system.                                                                              |
| Physical data gathering sources (a) and Social data gathering sources (b) | <ul style="list-style-type: none"> <li>▪ Rainfall gauge (a)</li> <li>▪ Stream gauge (a)</li> <li>▪ Radar (a)</li> <li>▪ Remote sensing (a) (b)</li> <li>▪ Census data (a) (b)</li> <li>▪ Narrative (a) (b)</li> <li>▪ Questionnaire (a) (b)</li> <li>▪ Interview (a) (b)</li> <li>▪ Focus group (a) (b)</li> <li>▪ Participant observation (a) (b)</li> <li>▪ Direct observation (researcher) (a) (b)</li> <li>▪ Social media (a) (b)</li> <li>▪ Newspaper (a) (b)</li> <li>▪ Official document (a) (b)</li> <li>▪ Volunteered Geographic Information (a) (b)</li> <li>▪ Social cartography/ mapping (a) (b)</li> <li>▪ Other (a) (b)</li> <li>▪ Not applicable* (a) (b)</li> <li>▪ Undefined** (a) (b)</li> </ul> | Identify the techniques for data gathering used in the studies. This category contributes to defining the “Methodological approach” category. |

**Table S2 (continued).**

| Category                                                    | Sub-categories                                                                                                                                                                                                                                                                                                                                                                                                                                                                                                                                                  | Goal                                                                                                                                        |
|-------------------------------------------------------------|-----------------------------------------------------------------------------------------------------------------------------------------------------------------------------------------------------------------------------------------------------------------------------------------------------------------------------------------------------------------------------------------------------------------------------------------------------------------------------------------------------------------------------------------------------------------|---------------------------------------------------------------------------------------------------------------------------------------------|
| Physical data processing (a) and Social data processing (b) | <ul style="list-style-type: none"> <li>▪ Agent-based modelling (a) (b)</li> <li>▪ Bayesian networks (a) (b)</li> <li>▪ Behavioural game (a) (b)</li> <li>▪ Cellular automata (a) (b)</li> <li>▪ Comparative analysis (a) (b)</li> <li>▪ Conceptual diagram (a) (b)</li> <li>▪ Content analysis (a) (b)</li> <li>▪ GIS (a) (b)</li> <li>▪ Grounded Theory (a) (b)</li> <li>▪ Empirical numerical modelling (a) (b)</li> <li>▪ Statistical analysis (a) (b)</li> <li>▪ Other (a) (b)</li> <li>▪ Not applicable* (a) (b)</li> <li>▪ Undefined** (a) (b)</li> </ul> | Identify the data processing technique used. This category contributes to defining the “Methodological approach” category.                  |
| Methodological approach                                     | <ul style="list-style-type: none"> <li>▪ Qualitative</li> <li>▪ Quantitative</li> <li>▪ Mixed (Quantitative-Qualitative)</li> </ul>                                                                                                                                                                                                                                                                                                                                                                                                                             | Identify the approach used considering the data gathering and processing steps.                                                             |
| Interdisciplinarity                                         | <ul style="list-style-type: none"> <li>▪ Mono-disciplinary</li> <li>▪ Weakly Multi or Interdisciplinary</li> <li>▪ Multi or Interdisciplinary</li> </ul>                                                                                                                                                                                                                                                                                                                                                                                                        | Identify the composition of disciplinary perspectives of authors considering their affiliation.                                             |
| Transdisciplinarity                                         | <ul style="list-style-type: none"> <li>▪ There was stakeholder engagement</li> <li>▪ There was not stakeholder engagement</li> </ul>                                                                                                                                                                                                                                                                                                                                                                                                                            | Identify if people were included in the study at some level like invited to fill surveys or to express their views, among other activities. |

\**Not applicable* indicates that the category was not applied in the study.

\*\**Undefined* indicates that the category was not clear.

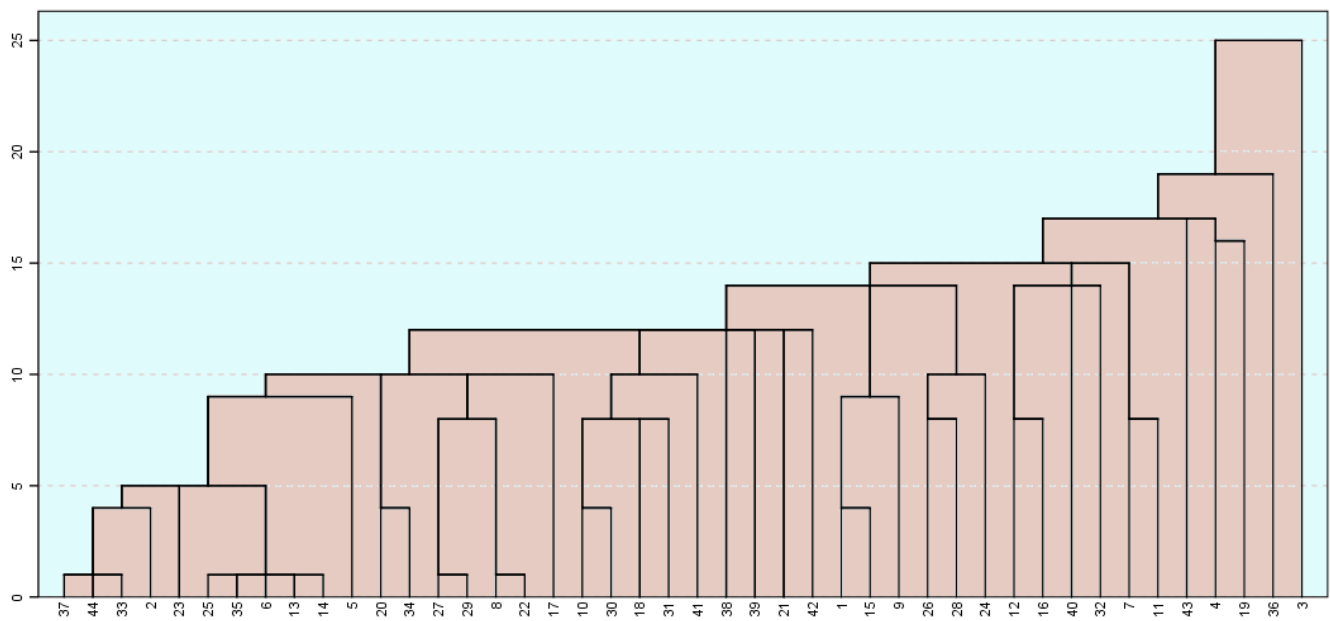

**Figure S1: Cluster analysis relating social components, data gathering, and processing tools used. The numbers on the x-axis indicate the article identification number according to the Systematic Review (Supplementary\_material-Systematic\_Review.xlsx). Categories such as “Other”, “Undefined”, and “Not applicable” were excluded before clustering the articles.**
